# Supplementary material for: Association between medical complications according to continuity of care and medication adherence in patients with hypertension in Korea: a national population-based cohort study
Source: PubMed Central journal article supplement — BMJ Open. 2023 Jun 29;13(6):e073404. doi: 10.1136/bmjopen-2023-073404 (PMC10314624; doi:10.1136/bmjopen-2023-073404), 2023-06-29
Supplement: bmjopen-2023-073404.draft_revisions.pdf [file bmjopen-2023-073404.draft_revisions.pdf]

# BMJ Open

BMJ Open is committed to open peer review. As part of this commitment we make the peer review history of every article we publish publicly available.

When an article is published we post the peer reviewers' comments and the authors' responses online. We also post the versions of the paper that were used during peer review. These are the versions that the peer review comments apply to.

The versions of the paper that follow are the versions that were submitted during the peer review process. They are not the versions of record or the final published versions. They should not be cited or distributed as the published version of this manuscript.

BMJ Open is an open access journal and the full, final, typeset and author-corrected version of record of the manuscript is available on our site with no access controls, subscription charges or pay-per-view fees (<http://bmjopen.bmj.com>).

If you have any questions on BMJ Open's open peer review process please email [info.bmjopen@bmj.com](mailto:info.bmjopen@bmj.com)

# BMJ Open

## The association between medical complications according to continuity of care and medication adherence in patients with hypertension in Korea: a national population-based cohort study

|                               |                                                                                                                                                                                       |
|-------------------------------|---------------------------------------------------------------------------------------------------------------------------------------------------------------------------------------|
| Journal:                      | <i>BMJ Open</i>                                                                                                                                                                       |
| Manuscript ID                 | bmjopen-2023-073404                                                                                                                                                                   |
| Article Type:                 | Original research                                                                                                                                                                     |
| Date Submitted by the Author: | 06-Mar-2023                                                                                                                                                                           |
| Complete List of Authors:     | Kim, Dayea; Korea University, Graduate School of Public Health<br>CHA, Jaewoo; Korea University, Preventive Medicine                                                                  |
| Keywords:                     | Hypertension < CARDIOLOGY, Cardiology < INTERNAL MEDICINE,<br>Primary Health Care, PREVENTIVE MEDICINE, Health policy < HEALTH<br>SERVICES ADMINISTRATION & MANAGEMENT, PUBLIC HEALTH |
|                               |                                                                                                                                                                                       |

SCHOLARONE™  
Manuscripts

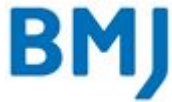

I, the Submitting Author has the right to grant and does grant on behalf of all authors of the Work (as defined in the below author licence), an exclusive licence and/or a non-exclusive licence for contributions from authors who are: i) UK Crown employees; ii) where BMJ has agreed a CC-BY licence shall apply, and/or iii) in accordance with the terms applicable for US Federal Government officers or employees acting as part of their official duties; on a worldwide, perpetual, irrevocable, royalty-free basis to BMJ Publishing Group Ltd ("BMJ") its licensees and where the relevant Journal is co-owned by BMJ to the co-owners of the Journal, to publish the Work in this journal and any other BMJ products and to exploit all rights, as set out in our [licence](#).

The Submitting Author accepts and understands that any supply made under these terms is made by BMJ to the Submitting Author unless you are acting as an employee on behalf of your employer or a postgraduate student of an affiliated institution which is paying any applicable article publishing charge ("APC") for Open Access articles. Where the Submitting Author wishes to make the Work available on an Open Access basis (and intends to pay the relevant APC), the terms of reuse of such Open Access shall be governed by a Creative Commons licence – details of these licences and which [Creative Commons](#) licence will apply to this Work are set out in our licence referred to above.

Other than as permitted in any relevant BMJ Author's Self Archiving Policies, I confirm this Work has not been accepted for publication elsewhere, is not being considered for publication elsewhere and does not duplicate material already published. I confirm all authors consent to publication of this Work and authorise the granting of this licence.

1  
2  
3 **The association between medical complications according to continuity of care and**  
4 **medication adherence in patients with hypertension in Korea: a national population-**  
5 **based cohort study**  
6  
7  
8  
9

10  
11  
12 Dayea Kim<sup>2</sup> M.P.H., Jaewoo Cha<sup>1\*</sup> M.P.H.  
13

14  
15  
16  
17 <sup>1</sup>Department of Preventive Medicine, Korea University College of Medicine, Seoul, Republic  
18 of Korea  
19

20  
21 <sup>2</sup> Graduate School of Public Health, Korea University College of Medicine, Seoul, Republic  
22 of Korea  
23  
24

25  
26  
27  
28 **\*Correspondence to:** Jaewoo Cha MPH  
29

30 Department of Preventive Medicine, Korea University College of Medicine, Seoul, Republic  
31 of Korea  
32

33 Seoul, 02841, Republic of Korea  
34

35 Phone: +82 10-5766-7651  
36

37 Fax: +82 2-927-7220  
38

39 E-mail: [cha7651@naver.com](mailto:cha7651@naver.com)  
40  
41  
42  
43  
44  
45  
46

47 **Conflict of interest**  
48

49 The authors declare that the research was conducted in the absence of any commercial or  
50 financial relationship that could be construed as potential conflicts of interest.  
51  
52  
53  
54  
55  
56  
57  
58  
59  
60

## Abstract

**Objectives:** To analyse the differences in hypertensive complications according to continuity of care and medication adherence in patients with ambulatory care-sensitive conditions.

**Design:** A national population-based retrospective cohort study.

**Setting:** Primary care data at all levels of hospitals in Korea.

**Participants:** In total, 102,519 patients diagnosed with hypertension were included in this study.

**Main outcome measures:** The levels of continuity of care (COC) and medication adherence were estimated within the initial 2 years of the follow-up period, and the incidence of medical complications, within the subsequent 16 years. We utilised COC and modified modified continuity index (MMCI), to measure continuity of care, and medication possession ratio (MPR) to measure medication adherence.

**Results:** Average COC levels in the hypertension group were 0.8112, respectively. The average proportion of MPR in the hypertension group was 73.3%. COC in patients with hypertension showed different results: the low COC (COC<1) group had a 1.14-fold increased risk of medical complications than the high COC (COC=1) group. In terms of MPR in patients with hypertension, the 0–19% MPR group had a 1.5-fold risk of medical complications, the 20–39% MPR group had a 1.42-fold risk of medical complications, the 40–59% MPR group had a 1.36-fold risk of medical complications, and the 60–79% MPR group had a 1.24-fold risk of medical complications relative to the 80–100% MPR group.

**Conclusions:** In patients with hypertension, high COC and medication adherence for the first 2 years of diagnosis can help prevent medical complications and promote patients' health. Therefore, effective strategies to improve COC and medication adherence are required. Future research will need to consider sensitivity analysis of COC and medication adherence with different study periods.

1  
2  
3  
4  
5 **Keywords:** Continuity of care, medication adherence, ambulatory care-sensitive conditions,  
6  
7  
8 hypertension, retrospective cohort  
9  
10  
11  
12  
13  
14  
15  
16  
17  
18  
19  
20  
21  
22  
23  
24  
25  
26  
27  
28  
29  
30  
31  
32  
33  
34  
35  
36  
37  
38  
39  
40  
41  
42  
43  
44  
45  
46  
47  
48  
49  
50  
51  
52  
53  
54  
55  
56  
57  
58  
59  
60

For peer review only

## INTRODUCTION

Hypertension is one of the most important health issues worldwide (1). In terms of the global prevalence of hypertension, almost 1.3 billion people, which is close to 20% of the world population, have hypertension (2). The World Health Organization and the Global Burden of Disease Study evaluated the contribution of all risk factors; hypertension ranked first at 20% with a contribution greater than that of obesity (3). Hypertension progresses in approximately 50% of cases caused by coronary artery disease or heart disease, approximately 33% by stroke, and 10–15% by renal disease (1). It is closely related to cardiovascular disease which is the leading cause of death worldwide (4).

Hypertension is also classified as ambulatory care-sensitive conditions (ACSCs) which means that early interventions or diagnosis are beneficial in preventing the progress of medical complications which may result in death, hospitalisation, and huge medical costs (5). ACSCs were classified by the Agency of Health Research and Quality (AHRQ), and the following 16 diseases selected by AHRQ are treated effectively in a timely manner with regards to providing medical services and preventing the occurrence of a disease or in the case of a disease that has already occurred (6). By treating and managing them early, hospitalisation due to aggravation or complications of the disease can be reduced (6). Treatment in the outpatient stage slows the onset and progression of the disease and cures acute and chronic diseases (7). This is known as possible or avoidable hospitalisation (5,8). ACSCs are representative indicators for evaluating the accessibility and quality of primary care (9).

Several studies have focused on hypertension, continuity of care, and medication adherence (10–12). However, the study design was limited to the natural environment and only a small number of patients (10-12) were included. In the data from the National Health Insurance Service (NHIS), over 50 million patients have been registered (13). Patient data

1  
2  
3 include not only physician visit information but also the prescription data for each visit (13).  
4  
5 Since the National Health Insurance is mandatory for every citizen in Korea, the reliability of  
6  
7 the data is extremely high, and data on the national level of population is stored in big data  
8  
9 centres (NHIS, 2022).  
10  
11

12 The objective of this study was to analyse the effect of ACSCs provided in a timely  
13  
14 and effective manner and prevent the occurrence of medical complications by treating and  
15  
16 managing early cases of hypertension that have already occurred using continuity of care  
17  
18 (COC) and medication possession ratio (MPR) measurements. Additionally, it aims to  
19  
20 analyse the primary care of ACSCs in different levels of hospitals and their outcomes.  
21  
22  
23  
24  
25

## 26 **METHODS**

### 27 **Inclusion and exclusion of participants**

28  
29 This study is a national population-based retrospective cohort study and investigated the  
30  
31 incidence of hypertension from 2002.01.01 to 2019.12.31 among the general population in  
32  
33 Korea. Unlike previous studies on the risk of complications according to COC and  
34  
35 medication adherence in the first 2 years, the present study examined the time variance,  
36  
37 including the time of the first visit to the medical institution and patient age (more than 30  
38  
39 years). 14-16 Patients who were prescribed drugs less than two times due to proper  
40  
41 measurement of MPR (Number of excluded participants=53,662), were aged <30 years for  
42  
43 the extraction of higher risk population (Number of excluded participants= 6,630), who  
44  
45 visited medical institutes in 2002 and 2003 (wash-out period, number of excluded  
46  
47 participants=54,180), who had medical complications before the index date due to the  
48  
49 prevention of contamination of results on the incidence (Number of excluded  
50  
51 participants=5,698), who were diagnosed with hypertension from 2016–2019 for maintaining  
52  
53 the baseline characteristics of target population (Number of excluded participants=38,340),  
54  
55  
56  
57  
58  
59  
60



1  
2  
3 who had taken related drugs or undergone related procedures or surgeries due to the  
4 suggestions from AHRQ on ACSCs research (Number of excluded participants=2,047), who  
5 had visited the medical institution before the index date due to hypertension to avoid unequal  
6 baseline characteristics of patients (Number of excluded participants=9,919), who visited the  
7 emergency room or were hospitalized within 2 years of the index date based on the  
8 suggestions from AHRQ on ACSCs research (Number of excluded participants=8,907), who  
9 died within 2 years of the index date for the washout period of mortality and severity  
10 (Number of excluded participants=1,065), and who visited the medical institute less than four  
11 times after the index date due to a proper measurement of COC (Number of excluded  
12 participants=22,308) were excluded to avoid bias such as misclassification bias or  
13 contamination of the results. Finally, 102,519 participants were included in the study from the  
14 retrospective data of 1 million members of the general population of Korea [Supplementary  
15 Figure 1].  
16  
17  
18  
19  
20  
21  
22  
23  
24  
25  
26  
27  
28  
29  
30  
31  
32  
33  
34

### 35 **Measurements**

36  
37 COC is defined as 'continuance of care by a healthcare provider to meet a patient's medical  
38 needs providing high quality and harmonised care (17). Additionally, with a good level of  
39 continuous care with doctors, the hospitalisation rate, prevalence rate, and the number of  
40 examinations are reduced (18). Methods for measuring COC include Usual Provider Care  
41 (UPC), most frequent primary care (MFPC), and modified modified continuity index  
42 (MMCI) (19).  
43  
44  
45  
46  
47  
48  
49  
50

51 Medication adherence refers to the degree of compliance with medications prescribed  
52 by a doctor (20). Accurate tracking of prescription data is essential for analysing medication  
53 adherence as well as effectively predicting healthcare costs and utilisation (20).  
54  
55  
56  
57

58 To measure medication adherence, the medication possession ratio (MPR) and proportion of  
59  
60

1  
2  
3 days covered (PDC) are usually used for analysis (21). We used COC for continuity of care  
4  
5 and MPR to estimate medication adherence using NHI data, which tracks prescription data  
6  
7 completely (12). We received professional advice from doctors of internal medicine or  
8  
9 cardiology for the antihypertensive drug selection [Supplementary Table 1].  
10  
11  
12  
13

### 14 **Data sources**

15  
16  
17 This study used the data of 1 million individuals from the National Health Insurance Service  
18  
19 database (DB) via stratified sampling from 2002 to 2019 (13). The sampling database is  
20  
21 based on the sex and age group (18 sections) of the National Health Information Service DB,  
22  
23 which includes the medical records of more than 50 million people (13). To maintain  
24  
25 representativeness, sampling was performed under the stratification of demographic  
26  
27 characteristics and income quintiles in the Republic of Korea (13). In addition, these cohort  
28  
29 data connected with the national-level health check-up DB of over 66% of general population  
30  
31 (over 33 million) in Korea. Furthermore, information on the cause of death is provided in  
32  
33 connection with death data from the National Statistical Office (22).  
34  
35  
36  
37  
38  
39

### 40 **Variables and Statistics**

41  
42 Factors influencing COC in patients with hypertension and the occurrence of  
43  
44 complications included the sex, age, insurance type, income, outpatient status, COC of the  
45  
46 patient, depending on the number of visits, number of providers, main medical institution,  
47  
48 and comorbidities. Missing values for any valuables were initially eliminated. There was no  
49  
50 lost to follow up because the dataset was based on medical record system and analyzed  
51  
52 retrospectively. Subgroup analysis was performed for primary care because of efficiency of  
53  
54 health system in Korea. Statistical significance was tested for mean and standard deviation  
55  
56 using Student's t-test and analysis of variance. A p-value of <0.05 was regarded to be  
57  
58  
59  
60

1  
2  
3 statistically significant, and if the assumption was not satisfied, Kruskal, a non-parametric  
4 test method, was utilized. In addition, the Wallis test, Wilcoxon rank-sum test, and Fisher's  
5 exact test were used.  
6  
7

8  
9  
10 Depending on the level of COC (COC index low vs. high), observations and  
11 differences in results according to independent variables were applied using the chi-squared  
12 test.  
13  
14

15  
16  
17 A comparison of complications according to COC and MPR was performed using  
18 Kaplan–Meier survival curves and log-rank tests. The differences in medical complications  
19 according to continuity of care and medication adherence were examined. The applied Cox  
20 proportional hazards model for incidence was analyzed. The output value of the Cox  
21 proportional hazards model is presented as hazard ratios (HRs) and 95% confidence intervals  
22 (CIs). Ethics approval for the study was obtained from the Institutional Review Board at  
23 Korea University (IRB document no. KUIRB-2021-0333-01). Informed consent was not  
24 required due to the retrospective nature of the study. The study has been prepared in  
25 accordance with the STROBE guidelines.  
26  
27  
28  
29  
30  
31  
32  
33  
34  
35  
36  
37  
38  
39

#### 40 **Patient and Public Involvement**

41  
42 Patients are involved from the time of visiting the medical institute because all medical  
43 records were registered for National Health Insurance. Informed consent was not required  
44 due to the retrospective nature of the study. All personal data and identifiable information  
45 was completely anonymised for retrospective research, with ethics approval from the  
46 Institutional Review Board of Korea University.  
47  
48  
49  
50  
51  
52  
53  
54  
55

## 56 **RESULTS**

### 57 **General characteristics of patients with hypertension**

58  
59  
60

1  
2  
3 The total number of participants who used the National Health Insurance Service  
4 sampling DB from 2002 to 2019 was 102,519 after elimination of patients who had missing  
5 data for any of the included variables. No patients were lost to follow-up because not only are  
6 all medical records registered through the electronic medical record system, but they are also  
7 tracked in accordance with the National Health Insurance Act established by the Korean  
8 government, with a follow-up period of 16 years after first 2 years. Data from medical claims  
9 were utilized.  
10  
11  
12  
13  
14  
15  
16  
17  
18

19 In terms of sex, 51,522 (50.3%) patients were men, and 50,997 (49.7%) were  
20 women.  
21  
22

23 In terms of age, we categorized age groups for age stratification. Participants aged  
24 50-59 years accounted for the largest share at 30.7%, followed by those aged 60-69 years  
25 (24.5%), 40-49 years (20.7%), 70-79 years (15.1%), 30-39 years (5.2%), 80 years or older  
26 (3.8%).  
27  
28  
29  
30  
31

32 Regarding the type of insurance, NHI insurers accounted for the majority (94.0%)  
33 followed by other insurance at 6.0%.  
34  
35  
36

37 The income level was divided into ten sections, which follow the official Korean  
38 standard of household income. 9th-10th decile (27.0%), 7th-8th decile (21.5%), 5th-6th  
39 decile (18.1%), 1-2 decile (16.5%), over three deciles was followed by the 4th decile  
40 (14.9%), and the 0th decile (2.0%).  
41  
42  
43  
44  
45

46 As for the number of outpatient visits for treatment, 7-9 times were the most  
47 frequent at 29.7%, followed by 10-12 times (29.5%), 13 times or more (25.0%), and finally  
48 4-6 times (15.8%).  
49  
50  
51  
52

53 As for the number of providers visited, it includes changes in medical institutes and  
54 doctors. 50.9% of the patients visited only one hospital (provider) followed by two places  
55 (provider) such as outpatient clinics (31.0%), three places (provider) (12.2%), and four places  
56  
57  
58  
59  
60

1  
2  
3 (provider) or more (5.9%).  
4

5 Clinics accounted for 70.8% of major medical institutions, followed by others  
6 (9.3%), general hospitals (9.1%), hospitals (6.1%), and tertiary general hospitals (4.7%).  
7

8 With respect to comorbidities, there were more cases of diabetes in the group without  
9 diabetes  
10

11 (71.3%) than in the group with diabetes (28.7%). Dyslipidemia was also higher in the  
12 group without Dyslipidaemia was also higher in the group without dyslipidemia (50.2%) than  
13 in that with dyslipidemia (49.8%). The level of COC is divided into a high- level group  
14 (COC=1) and a low-level group (COC<1). CoC level accounted for 50.9% of high-level  
15 group, followed by low-level group (49.1%).  
16  
17  
18  
19  
20  
21  
22  
23  
24  
25

26 MPR was divided into five categories (Excellent=80-100%, Good=60-79%,  
27 Normal=40-59%,  
28  
29

30 Bad=20-39%, and Very bad=0-19%). The number of patients with excellent MPR  
31 was 55.5%, the highest, followed by good (15.6%), normal (11.5%), bad (9.8%), and very  
32 bad (7.6%). The year of diagnosis was also added from 2004 to 2015 [Table 1]. Finally, in  
33 terms of year of diagnosis, it accounted for in 2004 (10.1%), 2005 (12.1%), 2006 (10.1%),  
34 2007 (8.8%), 2008 (8.9%), 2009 (8.7%), 2010 (7.9%), 2011 (7.6%), 2012 (7.4%), 2013  
35 (6.5%), 2014 (5.6%), 2015 (6.4%) [Table 1].  
36  
37  
38  
39  
40  
41  
42  
43  
44  
45  
46  
47  
48  
49  
50  
51  
52  
53  
54  
55  
56  
57  
58  
59  
60

**Table 1. General Characteristics of the Study population**

|                     |                           | N       | %     |
|---------------------|---------------------------|---------|-------|
| Total               |                           | 102,519 | 100.0 |
| Sex                 |                           |         |       |
|                     | Male                      | 51,522  | 50.3  |
|                     | Female                    | 50,997  | 49.7  |
| Age                 |                           |         |       |
|                     | 30–39                     | 2,084   | 2.0   |
|                     | 40–49                     | 16,943  | 16.5  |
|                     | 50–59                     | 15,266  | 14.9  |
|                     | 60–69                     | 18,532  | 18.1  |
|                     | 70–79                     | 22,056  | 21.5  |
|                     | Over 80                   | 27,638  | 27.0  |
| Insurance type      |                           |         |       |
|                     | National Health Insurance | 96,325  | 94.0  |
|                     | Others                    | 6,194   | 6.0   |
| Income              |                           |         |       |
|                     | 0 quartile                | 284     | 2.0   |
|                     | 1–2 quartile              | 16,943  | 16.5  |
|                     | 3–4 quartile              | 15,266  | 14.9  |
|                     | 5–6 quartile              | 18,532  | 18.1  |
|                     | 7–8 quartile              | 22,056  | 21.5  |
|                     | 9–10 quartile             | 27,638  | 27.0  |
| Number of visits    |                           |         |       |
|                     | 4–6 times                 | 16,175  | 15.8  |
|                     | 7–9 times                 | 30,475  | 29.7  |
|                     | 10–12 times               | 30,236  | 29.5  |
|                     | Over 13 times             | 25,633  | 25.0  |
| Number of providers |                           |         |       |
|                     | 1                         | 52,197  | 50.9  |
|                     | 2                         | 31,825  | 31.0  |
|                     | 3                         | 12,462  | 12.2  |
|                     | More than 4               | 6,053   | 5.9   |
| Levels of hospital  |                           |         |       |
|                     | Tertiary general hospital | 4,857   | 4.7   |

|                   |                     |        |      |
|-------------------|---------------------|--------|------|
|                   | General hospital    | 9,292  | 9.1  |
|                   | Hospital            | 6,270  | 6.1  |
|                   | Clinics             | 72,612 | 70.8 |
|                   | Others              | 9,488  | 9.3  |
| CCI Index         |                     |        |      |
| Diabetes          |                     |        |      |
|                   | Yes                 | 29,391 | 28.7 |
|                   | No                  | 73,128 | 71.3 |
| Dyslipidaemia     |                     |        |      |
|                   | Yes                 | 51,048 | 49.8 |
|                   | No                  | 51,471 | 50.2 |
| COC level         |                     |        |      |
|                   | High (COC = 1)      | 52,179 | 50.9 |
|                   | Low (COC > 1)       | 50,340 | 49.1 |
| MPR Level         |                     |        |      |
|                   | Excellent (80-100%) | 56,939 | 55.5 |
|                   | Good (60-79%)       | 16,012 | 15.6 |
|                   | Normal (40-59%)     | 11,808 | 11.5 |
|                   | Bad (20-39%)        | 9,996  | 9.8  |
|                   | Very bad (0-19%)    | 7,764  | 7.6  |
| Year of Diagnosis |                     |        |      |
|                   | 2004                | 10,357 | 10.1 |
|                   | 2005                | 12,362 | 12.1 |
|                   | 2006                | 10,321 | 10.1 |
|                   | 2007                | 9,017  | 8.8  |
|                   | 2008                | 9,101  | 8.9  |
|                   | 2009                | 8,906  | 8.7  |
|                   | 2010                | 8,082  | 7.9  |
|                   | 2011                | 7,807  | 7.6  |
|                   | 2012                | 7,623  | 7.4  |
|                   | 2013                | 6,699  | 6.5  |
|                   | 2014                | 5,772  | 5.6  |
|                   | 2015                | 6,472  | 6.3  |

N, Number; CCI, Charlson Comorbidity index; COC, Continuity of Care; MPR, medication possession ratio

## Hazard ratio of hypertension complications according to continuity of treatment and adherence to medication in hypertension patients

In participants with hypertension in the low adherence group (COC < 1) compared to the high adherence group (COC = 1) the risk of complications was 1.14 times higher (HR=1.14, 95% CI:1.10–1.17) and statistically significant [Table 2].

**Table 2. Overall hazard ratio according to COC level**

| COC level | Hazard Ratio |            |                |                            |                 |
|-----------|--------------|------------|----------------|----------------------------|-----------------|
|           | Patients     | Events (N) | IR per 1000PYR | <sup>a</sup> HR(95% CI)    | <i>p</i> -value |
| High      | 52,179       | 7,143      | 15.4           | Ref                        | -               |
| Low       | 50,340       | 8,142      | 17.7           | <b>1.14(1.10–1.17) ***</b> | <b>&lt;.001</b> |

N, Number; COC, continuity of care; HR, hazards ratio; CI, confidence interval; IR, Incidence rate; PYR, Person Years at

Risk

<sup>a</sup> Adjusted sex, age, insurance type, income, number of visits, number of providers, level of hospital, and CCI Index

\*\*\*Significance at  $p < .001$ ; \*\*Significance at  $p < .01$ .

In comparison to the excellent medication adherence group (80–100%), the good group (60–79%) was 1.24 times (HR=1.24, 95% CI:1.18–1.29), normal group (40–59%) 1.36 times (HR=1.36, 95% CI:1.29–1.42), bad group (20–39%) 1.42 times (HR=1.42, 95% CI:1.35–1.50), and very bad group (0–19%) 1.50 times (HR=1.50, 95% CI:1.42–1.59) at a higher risk of hypertensive complications, and all were statistically significant [Table 3].

**Table 3. Overall hazard ratio according to MPR level**

| MPR Level | Hazard Ratio |           |                |                         |                 |
|-----------|--------------|-----------|----------------|-------------------------|-----------------|
|           | Patients     | Events(N) | IR per 1000PYR | <sup>a</sup> HR(95% CI) | <i>p</i> -value |



|           |        |       |      |                     |       |
|-----------|--------|-------|------|---------------------|-------|
| Excellent | 56,939 | 7,143 | 14.1 | Ref                 |       |
| Good      | 16,012 | 2,695 | 17.9 | 1.24(1.18-1.29) *** | <.001 |
| Normal    | 11,808 | 2,146 | 19.5 | 1.36(1.29-1.42) *** | <.001 |
| Bad       | 9,996  | 1,834 | 20.3 | 1.42(1.35-1.50) *** | <.001 |
| Very bad  | 7,764  | 1,467 | 21.4 | 1.50(1.42-1.59) *** | <.001 |

N, Number; MPR, medication possession ratio; HR, hazards ratio; IR, Incidence rate; PYR, Person Years at Risk

<sup>a</sup> Adjusted sex, age, insurance type, income, number of visits, number of providers, level of hospital, and CCI Index

\*\*\*Significance at  $p < .001$ ; \*\*Significance at  $p < .01$ .

### **Hazard ratio for each type of hypertension complication according to treatment continuity and medication adherence**

COC and medication adherence for the time until complications occurred were analysed.

Kaplan–Meier survival curves analysis was performed [Supplementary Figure 2, Supplementary Figure 3].

#### ***Hazard ratio of coronary artery disease***

In coronary sinuses in the low continuity group (COC<1) compared to the high COC group (COC=1), the risk of developing pulse disease was 1.10 times higher (HR=1.10, 95% CI:1.03–1.16) and statistically significant.

In comparison to the excellent medication adherence group (80–100%), the good group (60–79%) was 1.26 times (HR=1.26, 95% CI:1.16–1.37), normal group (40–59%) was 1.35 times (HR=1.35, 95% CI:1.23–1.47), Bad group (20-39%) 1.38 times (HR=1.38, 95% CI:1.261.52), and the very bad group (0–19%) 1.38 times (HR=1.38, 95% CI:1.24–1.35) at higher risk of coronary artery disease and all were statistically significant.

#### ***Hazard ratio of vascular complications***

Vascular summation in the low continuity group (COC<1) compared to that in the high

continuity group (COC=1), the risk of developing the disease was 1.07 times (HR=1.07, 95% CI:0.94-1.23) higher and was not statistically significant.

In comparison to the excellent medication adherence group (80–100%), the good group (60–79%) was 1.25 times (HR=1.25, 95% CI:1.04–1.51), normal group (40–59%) 1.33 times (HR=1.33, 95% CI:1.08–1.63), bad group (20–39%) 1.45 times (HR=1.45, 95% CI:1.17–1.79), and the very bad group (0–19%) 1.59 times (HR=1.59, 95% CI:1.26–2.00) at higher risk of vascular complications and all were statistically significant.

### ***Hazard ratio of cerebrovascular disease***

The risk of developing a cerebrovascular disease in the group with low continuity of care (COC<1) compared to the group with high continuity of care (COC=1), was 1.14 times higher (HR=1.14, 95% CI:1.09–1.19) and statistically significant.

In comparison to the excellent medication adherence group (80–100%), the good group (60–79%) was 1.18 times (HR=1.18, 95% CI:1.11–1.26), normal group (40–59%) 1.38 times (HR=1.38, 95% CI:1.29–1.47), bad group (20–39%) was 1.51 times (HR=1.51, 95% CI:1.41–1.62), and very bad group (0–19%) 1.13 times (HR=1.13, 95% CI:1.43–1.67) at higher risk of cerebrovascular disease and all were statistically significant.

### ***Hazard ratio of heart disease***

The risk of developing heart disease in the low continuity of care group (COC<1) was 1.11 times higher (HR=1.11, 95% CI:1.06–1.17) compared to the high continuity of care group (COC=1), which was statistically significant.

In comparison to the excellent medication adherence group (80–100%), the good (60–79%), normal (40–59%), bad (20–39%), and very bad groups (0–19%) had 1.21 (HR=1.21, 95% CI:1.13–1.30), 1.33 (HR=1.33, 95% CI:1.23–1.44), 1.36 (HR=1.36, 95%

CI:1.25–1.48), and 1.47 times (HR=1.47, 95% CI:1.34–1.62) higher risk of heart disease, respectively, and all were statistically significant.

### ***Hazard ratio of hypertensive nephropathy***

In patients with hypertension in the low-adherence group (COC<1) compared to the high-adherence group (COC=1) the risk of developing hypertensive nephropathy was 1.05 times higher (HR=1.05, 95% CI:0.95–1.16) and this difference was not statistically significant.

In comparison to the excellent medication adherence group (80–100%), the good (60–79%), normal (40–59%), bad (20–39%), and very bad groups (0–19%) were 1.39 (HR=1.39, 95% CI:1.21–1.60), 1.58 (HR=1.58, 95% CI:1.36–1.84), 1.62 (HR=1.62, 95% CI:1.11–1.89), and 1.62 times (HR=1.62, 95% CI:1.35–1.94) at higher risk of hypertensive nephropathy, respectively and all were statistically significant [Table 4, Table 5].

**Table 4. Hazard ratio of medical complications according to COC level**

|                        |                         | COC level |                            |
|------------------------|-------------------------|-----------|----------------------------|
|                        |                         | High      | Low                        |
| CAD                    | Events(N)               | 2,117     | 2,350                      |
|                        | IR per 1000PYR          | 4.4       | 4.9                        |
|                        | <sup>a</sup> HR(95% CI) | Ref       | <b>1.10 (1.03–1.16) **</b> |
|                        | <i>p-value</i>          | -         | <b>0.002</b>               |
| Vascular complications | Events(N)               | 412       | 451                        |
|                        | IR per 1000PYR          | 0.8       | 0.9                        |
|                        | <sup>a</sup> HR(95% CI) | Ref       | 1.07 (0.94–1.23)           |

|                          |                         |       |                             |
|--------------------------|-------------------------|-------|-----------------------------|
|                          | <i>p-value</i>          | -     | 0.302                       |
| Cerebrovascular disease  | Events(N)               | 3,639 | 4,178                       |
|                          | IR per<br>1000PYR       | 7.6   | 8.7                         |
|                          | <sup>a</sup> HR(95% CI) | Ref   | <b>1.14 (1.09–1.19) ***</b> |
|                          | <i>p-value</i>          | -     | <b>&lt;.001</b>             |
| Heart disease            | Events(N)               | 2,602 | 2,951                       |
|                          | IR per<br>1000PYR       | 5.4   | 6.1                         |
|                          | <sup>a</sup> HR(95% CI) | Ref   | <b>1.11 (1.06–1.17) ***</b> |
|                          | <i>p-value</i>          | -     | <b>&lt;.001</b>             |
| Hypertensive nephropathy | Events(N)               | 716   | 768                         |
|                          | IR per<br>1000PYR       | 1.5   | 1.6                         |
|                          | <sup>a</sup> HR(95% CI) | Ref   | 1.05 (0.95–1.16)            |
|                          | <i>p-value</i>          | -     | 0.367                       |

N, Number; HR, hazards ratio; CI, confidence interval; COC, continuity of care; CAD,

Coronary Artery Disease; IR, Incidence rate; PYR, Person Years at Risk

<sup>a</sup> Adjusted sex, age, insurance type, income, number of visits, number of providers, level of hospital, and CCI Index

\*\*\*Significance at  $p < .001$ ; \*\*Significance at  $p < .01$ .

**Table 5. Hazard ratio of medical complications according to MPR level**

|                         |                         | MPR level |                             |                             |                             |                             |
|-------------------------|-------------------------|-----------|-----------------------------|-----------------------------|-----------------------------|-----------------------------|
|                         |                         | Excellent | Good                        | Normal                      | Bad                         | Very bad                    |
| CAD                     | Events(N)               | 2,081     | 811                         | 635                         | 535                         | 405                         |
|                         | IR per 1000PYR          | 4         | 5.1                         | 5.5                         | 5.6                         | 5.5                         |
|                         | <sup>a</sup> HR(95% CI) | Ref       | <b>1.26 (1.16–1.37) ***</b> | <b>1.35 (1.23–1.47) ***</b> | <b>1.38 (1.26–1.52) ***</b> | <b>1.38 (1.24–1.53) ***</b> |
|                         | <i>p-value</i>          | -         | <b>&lt;.001</b>             | <b>&lt;.001</b>             | <b>&lt;.001</b>             | <b>&lt;.001</b>             |
| Vascular complications  | Events(N)               | 393       | 154                         | 120                         | 107                         | 89                          |
|                         | IR per 1000PYR          | 0.7       | 1                           | 1                           | 1.1                         | 1.2                         |
|                         | <sup>a</sup> HR(95% CI) | Ref       | <b>1.25 (1.04–1.51) *</b>   | <b>1.33 (1.08–1.63) **</b>  | <b>1.45 (1.17–1.79) ***</b> | <b>1.59 (1.26–2.00) ***</b> |
|                         | <i>p-value</i>          | -         | <b>0.018</b>                | <b>0.007</b>                | <b>0.001</b>                | <b>&lt;.001</b>             |
| Cerebrovascular disease | Events(N)               | 3,613     | 1,312                       | 1,120                       | 997                         | 775                         |
|                         | IR per 1000PYR          | 6.9       | 8.4                         | 9.8                         | 10.6                        | 10.8                        |
|                         | <sup>a</sup> HR(95% CI) | Ref       | <b>1.18 (1.11–1.26) ***</b> | <b>1.38 (1.29–1.47) ***</b> | <b>1.51 (1.41–1.62) ***</b> | <b>1.54 (1.43–1.67) ***</b> |
|                         | <i>p-value</i>          | -         | <b>&lt;.001</b>             | <b>&lt;.001</b>             | <b>&lt;.001</b>             | <b>&lt;.001</b>             |
| Heart disease           | Events(N)               | 2,585     | 981                         | 788                         | 659                         | 540                         |
|                         | IR per 1000PYR          | 4.9       | 6.2                         | 6.8                         | 6.9                         | 7.4                         |
|                         | <sup>a</sup> HR(95% CI) | Ref       | <b>1.21 (1.13–1.30) ***</b> | <b>1.33 (1.23–1.44) ***</b> | <b>1.36 (1.25–1.48) ***</b> | <b>1.47 (1.34–1.62) ***</b> |
|                         | <i>p-value</i>          | -         | <b>&lt;.001</b>             | <b>&lt;.001</b>             | <b>&lt;.001</b>             | <b>&lt;.001</b>             |

|                          |                         |     |                             |                             |                             |                             |
|--------------------------|-------------------------|-----|-----------------------------|-----------------------------|-----------------------------|-----------------------------|
|                          | Events(N)               | 633 | 278                         | 232                         | 194                         | 147                         |
|                          | IR per 1000PYR          | 1.2 | 1.7                         | 2                           | 2                           | 2                           |
| Hypertensive nephropathy | <sup>a</sup> HR(95% CI) | Ref | <b>1.39 (1.21–1.60) ***</b> | <b>1.58 (1.36–1.84) ***</b> | <b>1.62 (1.38–1.90) ***</b> | <b>1.62 (1.35–1.94) ***</b> |
|                          | <i>p-value</i>          | -   | <b>&lt;.001</b>             | <b>&lt;.001</b>             | <b>&lt;.001</b>             | <b>&lt;.001</b>             |

N, Number; HR, hazards ratio; CI, confidence interval; MPR, medicine possession rate; CAD, Coronary Artery Disease; IR, Incidence rate; PYR, Person Years at Risk

<sup>a</sup> Adjusted sex, age, insurance type, income, number of visits, number of providers, level of hospital, and CCI Index

\*\*\*Significance at  $p < .001$ ; \*\*Significance at  $p < .01$ .

1  
2  
3 ***Subgroup analysis of hazard ratio of medical complications according to COC, MPR levels***  
4  
5 ***in clinics (primary care)***  
6

7  
8 In patients with hypertension in the low-adherence group (COC<1) compared to the high-  
9  
10 adherence group (COC=1) the risk of developing medical complications was 1.16 times  
11  
12 higher (HR=1.16, 95% CI:1.12–1.21) and this difference was statistically significant.  
13

14  
15 In comparison to the excellent medication adherence group (80–100%), the good (60–79%),  
16  
17 normal (40–59%), bad (20–39%), and very bad groups (0–19%) were 1.21 (HR=1.21, 95%  
18  
19 CI:1.15–1.28), 1.37 (HR=1.37, 95% CI:1.29–1.45), 1.43 (HR=1.43, 95% CI:1.34–1.52), and  
20  
21 1.51 times (HR=1.51, 95% CI:1.40–1.61) at higher risk of medical complications,  
22  
23 respectively and all were statistically significant.  
24

25  
26 When it comes to the number of visits, 4-6 times compared to 7-9 times, 10-12 times,  
27  
28 and over 13 times of the risk of developing medical complications was 0.86 times (HR=0.86,  
29  
30 95% CI:0.80–0.91), 0.78 times (HR=0.78, 95% CI:0.73–0.83), 0.85 times (HR=0.85, 95%  
31  
32 CI:0.80–0.91) higher and this difference were statistically significant [Supplementary Table  
33  
34 2].  
35  
36  
37  
38  
39

## 40 **DISCUSSION**

41  
42 This study highlights the fact that the continuity of care and the order of establishing health  
43  
44 policies can increase response and lower the risk of long-term complications within the first  
45  
46 two years of diagnosis of hypertension.  
47

48  
49 In the present study, COC and medication adherence were associated with the  
50  
51 occurrence of complications caused by hypertension. Overall, for patients with hypertension  
52  
53 in the low adherence group (COC<1) compared to the high adherence group (COC=1), the  
54  
55 risk of complications was 1.14 times higher and statistically significant. Similarly, with  
56  
57 regards to coronary sinus, cerebrovascular disease, and coronary heart disease, the risk of  
58  
59  
60

1  
2  
3 developing pulse disease, cerebrovascular disease, and coronary disease, respectively was  
4  
5 greater in the low continuity group than in the high continuity of care group.  
6  
7

8 In terms of overall medication adherence, in comparison to the excellent medication  
9 adherence group (80–100%), the good group (60–79%) was 1.24, 1.26, 1.25, 1.18, 1.21, and  
10 1.39 times, normal group (40–59%) 1.36, 1.35, 1.33, 1.38, 1.33, and 1.58 times, bad group  
11 (20–39%) 1.42, 1.38, 1.45, 1.51, 1.36, and 1.62 times, and very bad group (0–19%) 1.50, 1.38,  
12 1.59, 1.13, 1.47, and 1.62 times at higher risk of hypertensive complications, coronary artery  
13 disease, vascular complications, cerebrovascular disease, heart disease, and hypertensive  
14 nephropathy, respectively, and all were statistically significant.  
15  
16  
17  
18  
19  
20  
21  
22

23 This study had several strengths. First, the study obtained population  
24 representativeness because national health insurance is mandatory in Korea. Second, medical  
25 complications were selected according to the AHRQ standards. Third, this is the first attempt  
26 at a long-term (17-year) analysis of ACSCs with medical complications.  
27  
28  
29  
30  
31  
32

33 However, this study also had several limitations. First, since only the continuity of  
34 treatment and medication adherence in the initial 2 years were measured, follow-up after 2  
35 years was not reflected in the effects of changes in care. Second, the risk of complications or  
36 blood pressure level was not analysed in this study. Third, whether other underlying diseases  
37 or external factors may affect the results of this study could not be fully excluded. Fourth, due  
38 the retrospective nature of this observational study, recall bias may impact the validity of this  
39 study.  
40  
41  
42  
43  
44  
45  
46  
47  
48

49 There are several policies for the management of ACSCs around the world. For  
50 example, policies for diabetes, cervical cancer, and asthma in Australia and policies for  
51 depression, cancer, and asthma in the UK and USA; it is possible to provide primary care in a  
52 timely manner and manage chronic diseases more efficiently by including more diseases  
53 subject to chronic disease management in the ACSCs.  
54  
55  
56  
57  
58  
59  
60



1  
2  
3 A follow-up study on the differences in the risk of complications according to  
4  
5 changes in care should be conducted in the future.  
6  
7  
8  
9

### 10 **Transparency statement**

11  
12 The lead author affirms that the manuscript is an honest, accurate, and transparent account of  
13  
14 the study being reported; that no important aspects of the study have been omitted; and that  
15  
16 any discrepancies from the study as originally planned (and, if relevant, registered) have been  
17  
18 explained.  
19  
20  
21  
22  
23

### 24 **SUMMARY BOXES**

#### 25 **What is already known on this topic:**

- 26 • In Ambulatory care-sensitive conditions (ACSC) early interventions or diagnosis are  
27  
28 beneficial in preventing the progress of medical complications which may result in  
29  
30 death, hospitalisation, and huge medical costs.  
31  
32
- 33 • Several studies have focused on hypertension, continuity of care, and medication  
34  
35 adherence; however, the study design was limited to the natural environment, and  
36  
37 only a small number of patients were included. Hence this study was conducted using  
38  
39 data from the National Health Insurance Scheme, which is more representative of the  
40  
41 entire population.  
42  
43  
44  
45  
46

#### 47 **What this study adds:**

- 48 • In patients with hypertension, a high level of continuity of care and medication  
49  
50 adherence for the first 2 years of diagnosis can have a positive effect on preventing  
51  
52 medical complications and promoting patients' health.  
53  
54
- 55 • Therefore, effective strategies to improve continuity of care and medication adherence  
56  
57 are required.  
58  
59  
60

### Data Sharing Statement

Raw data were generated at NHIS (National Health Insurance Services). Derived data supporting the findings of this study are available from the corresponding author Jaewoo Cha on request.

For peer review only

**REFERENCES**

- 1) World Health Organisation. Hypertension. World Health Organisation. Retrieved November 27, 2022, from [https://www.who.int/health-topics/hypertension#tab=tab\\_1](https://www.who.int/health-topics/hypertension#tab=tab_1)
- 2) World Health Organisation. More than 700 million people with untreated hypertension. World Health Organization. Retrieved November 27, 2022, from <https://www.who.int/news/item/25-08-2021-more-than-700-million-people-with-untreated-hypertension>
- 3) Forouzanfar MH, Liu P, Roth GA, Ng M, Biryukov S, Marczak L, et al. Global burden of hypertension and systolic blood pressure of at least 110 to 115 mm Hg, 1990-2015. *JAMA* 2017;317:165-182. <https://doi.org/10.1001/jama.2016.19043>
- 4) Liu J, Bu X, Wei L, Wang X, Lai L, Dong C, et al. Global burden of cardiovascular diseases attributable to hypertension in young adults from 1990 to 2019. *J Hypertens* 2021;39: 2488–2496. <https://doi.org/10.1097/hjh.0000000000002958>
- 5) Ansari Z. The Concept and usefulness of ambulatory care sensitive conditions as indicators of quality and access to primary health care. *Aust J Prim Health* 2007;13:91. <http://dx.doi.org/10.1071/PY07043>
- 6) Lin W, Huang I, Wang S, Yang M, Yaung C. Continuity of diabetes care is associated with avoidable hospitalizations: evidence from Taiwan's National Health Insurance scheme. *Int J Qual Health Care* 2009;22: 3-8. <http://dx.doi.org/10.1093/intqhc/mzp059>
- 7) Billings J, Zeitel L, Lukomnik J, Carey T, Blank A, Newman L. Impact Of socioeconomic status on hospital use In New York City. *Health Aff (Millwood)* 1993; 12:162-173. <https://doi.org/10.1377/hlthaff.12.1.162>
- 8) Gao J, Moran E, Li Y, Almenoff P. Predicting potentially avoidable hospitalizations. *Med Care* 2014;52:164-171. <https://doi.org/10.1097/mlr.0000000000000041>

- 1  
2  
3 9) Laditka J, Laditka S, Mastanduno M. Hospital utilization for ambulatory care sensitive  
4 conditions: health outcome disparities associated with race and ethnicity. *Soc Sci Med*  
5 2003;57:1429-1441. [https://doi.org/10.1016/s0277-9536\(02\)00539-7](https://doi.org/10.1016/s0277-9536(02)00539-7)  
6  
7
- 8  
9  
10 10) Shin S, Song H, Oh SK, Choi KE, Kim H, Jang S. Effect of antihypertension  
11 medication adherence on hospitalization for cardiovascular disease and mortality in  
12 hypertension patients. *Hyperten Res* 2013;36:1000-1005.  
13  
14  
15  
16  
17 <https://doi.org/10.1038/hr.2013.85>  
18
- 19 11) Nam Y, Cho K, Kang H, Lee K, Park E. Greater continuity of care reduces hospital  
20 admissions in patients with hypertension: an analysis of nationwide health insurance  
21 data in Korea, 2011–2013. *Health Policy* 2016;120:604-611.  
22  
23  
24  
25  
26  
27 <https://doi.org/10.1016/j.healthpol.2016.04.012>  
28
- 29 12) Gygli N, Zúñiga F, Simon M. Regional variation of potentially avoidable  
30 Hospitalisation in Switzerland: an observational study. *BMC Health Serv Res*  
31 2021;21:849. <https://doi.org/10.1186/s12913-021-06876-5>  
32  
33  
34
- 35 13) NHIS. (2022). National Health Insurance Data Sharing Service. Retrieved November  
36 27, 2022, from <https://nhiss.nhis.or.kr/bd/ab/bdaba012eng.do>  
37  
38
- 39 14) Brousseau ME, Schaefer EJ, Wolfe ML, Bloedon LT, Digenio AG, Clark, RW, et al.  
40 Effects of an inhibitor of cholesteryl ester transfer protein on HDL cholesterol. *N Eng J*  
41  
42  
43  
44  
45  
46 *Med* 2004; 350:1505–1515.
- 47 15) Cheng S, Chen C, Hou Y. A longitudinal examination of continuity of care and  
48 avoidable hospitalization. *Arch Intern Med* 2010; 170: 1671-1677.  
49  
50  
51  
52 <https://doi.org/10.1001/archinternmed.2010.340>  
53
- 54 16) Christakis DA, Wright JA, Koepsell TD, Emerson S, Connell FA. Is greater continuity  
55 of care associated with less emergency department utilization? *Pediatrics* 1999;103:  
56  
57  
58  
59  
60 738-742.

- 1  
2  
3 17) Citro R, Ghosh S, Churgin PG. A fundamental metric for continuity of care: modeling  
4 and performance evaluation. *IEEE Trans Inf Technol Biomed* 1997;1:189-204.  
5  
6 <https://doi.org/10.1109/4233.654862>  
7  
8
- 9  
10 18) Tom J, Tseng C, Davis J, Solomon C, Zhou C, Mangione-Smith R. Missed well-child  
11 care visits, low continuity of care, and risk of ambulatory care-sensitive  
12 hospitalizations in young children. *Arch Pediatr Adolesc Med* 2010;164(11): 1052-  
13 1058 <https://doi.org/10.1001/archpediatrics.2010.201>  
14  
15  
16
- 17 19) Hong JS, Kim JY, Kang HC. Continuity of ambulatory care among adult patients for  
18 type 2 diabetes and its associated factors in Korea. *Korean J Health Policy and Adm*  
19 2009;19:51–70. <https://doi.org/10.4332/kjhpa.2009.19.2.051>  
20  
21  
22  
23
- 24 20) Kalsekar I, Iyer S, Mody R, Rajagopalan R, Kavookjian J. Utilization and costs for  
25 compliant patients initiating therapy with pioglitazone or rosiglitazone versus insulin in  
26 a Medicaid fee-for-service population. *J Manage Care Pharm* 2006;12: 121-129.  
27  
28 <https://doi.org/10.18553/jmcp.2006.12.2.121>  
29  
30  
31  
32
- 33 21) Gygli N, Zúñiga F, Simon M. Regional variation of potentially avoidable  
34 hospitalisation in Switzerland: an observational study. *BMC Health Serv Res* 2021;  
35 21:849. <https://doi.org/10.1186/s12913-021-06876-5>  
36  
37  
38  
39
- 40 22) Statistics Korea. Statistics Korea - Kostat.go.kr [Internet]. Statistics Korea- Cause of  
41 death. [cited 2022 Dec2]. Available from: <https://kostat.go.kr/portal/eng/index.action>  
42  
43  
44  
45  
46  
47  
48  
49  
50  
51  
52  
53  
54  
55  
56  
57  
58  
59  
60

## Supplementary Materials

**Supplementary Table 1.** Antihypertensive drugs included.

| Drugs included                                                                                                                                                                                                                                                                                                                                                                                                                                         |
|--------------------------------------------------------------------------------------------------------------------------------------------------------------------------------------------------------------------------------------------------------------------------------------------------------------------------------------------------------------------------------------------------------------------------------------------------------|
| Captopril, enalapril, ramipril, candesartan, fimasartan, losartan, olmesartan, telmisartan, valsartan, carteolol, nadolol, propranolol, nifedipine, felodipine, amlodipine, lercanidipine, CCB, diltiazem, verapamil, atenolol, bisoprolol, celiprolol, metoprolol, amosulalol, carvedilol, bevantolol, doxazosin, terazosin, hydrochlorothiazide, indapamide, furosemide, torsemide, spironolactone, amiloride, hydralazine, minoxidil, nitroprusside |

**Supplementary Table 2.** Subgroup analysis of hazard ratio of medical complications according to COC, MPR levels in clinics (primary care)

|                  | Hazard Ratio |           |                |                           |                 |
|------------------|--------------|-----------|----------------|---------------------------|-----------------|
|                  | Patients     | Events(N) | IR per 1000PYR | HR (95% CI)               | <i>p-value</i>  |
| COC level        |              |           |                |                           |                 |
| High             | 36,273       | 4,437     | 13.8           | Ref                       |                 |
| Low              | 36,339       | 5,405     | 16.2           | <b>1.16(1.12-1.21)***</b> | <b>&lt;.001</b> |
| MPR Level        |              |           |                |                           |                 |
| Excellent        | 41,414       | 4,674     | 12.8           | Ref                       |                 |
| Good             | 11,326       | 1,738     | 16.1           | <b>1.21(1.15-1.28)***</b> | <b>&lt;.001</b> |
| Normal           | 7,953        | 1,362     | 18.1           | <b>1.37(1.29-1.45)***</b> | <b>&lt;.001</b> |
| Bad              | 6,518        | 1,118     | 18.7           | <b>1.43(1.34-1.52)***</b> | <b>&lt;.001</b> |
| Very bad         | 5,401        | 950       | 19.6           | <b>1.51(1.40-1.61)***</b> | <b>&lt;.001</b> |
| Number of visits |              |           |                |                           |                 |

|               |        |       |      |                           |                 |
|---------------|--------|-------|------|---------------------------|-----------------|
| 4~6 times     | 8,770  | 1,388 | 17.8 | Ref                       |                 |
| 7~9 times     | 18,484 | 2,490 | 15.1 | <b>0.86(0.80-0.91)***</b> | <b>&lt;.001</b> |
| 10~12 times   | 23,493 | 3,112 | 14.1 | <b>0.78(0.73-0.83)***</b> | <b>&lt;.001</b> |
| Over 13 times | 21,865 | 2,852 | 14.9 | <b>0.85(0.80-0.91)***</b> | <b>&lt;.001</b> |

N, Number; COC, continuity of care; MPR, Medication Possession Ratio; HR, hazards ratio; CI, confidence interval; IR,

Incidence rate; PYR, Person Years at Risk

\*\*\*Significance at  $p < .001$ .

For peer review only

Supplementary Figure 1. Flow diagram of study population

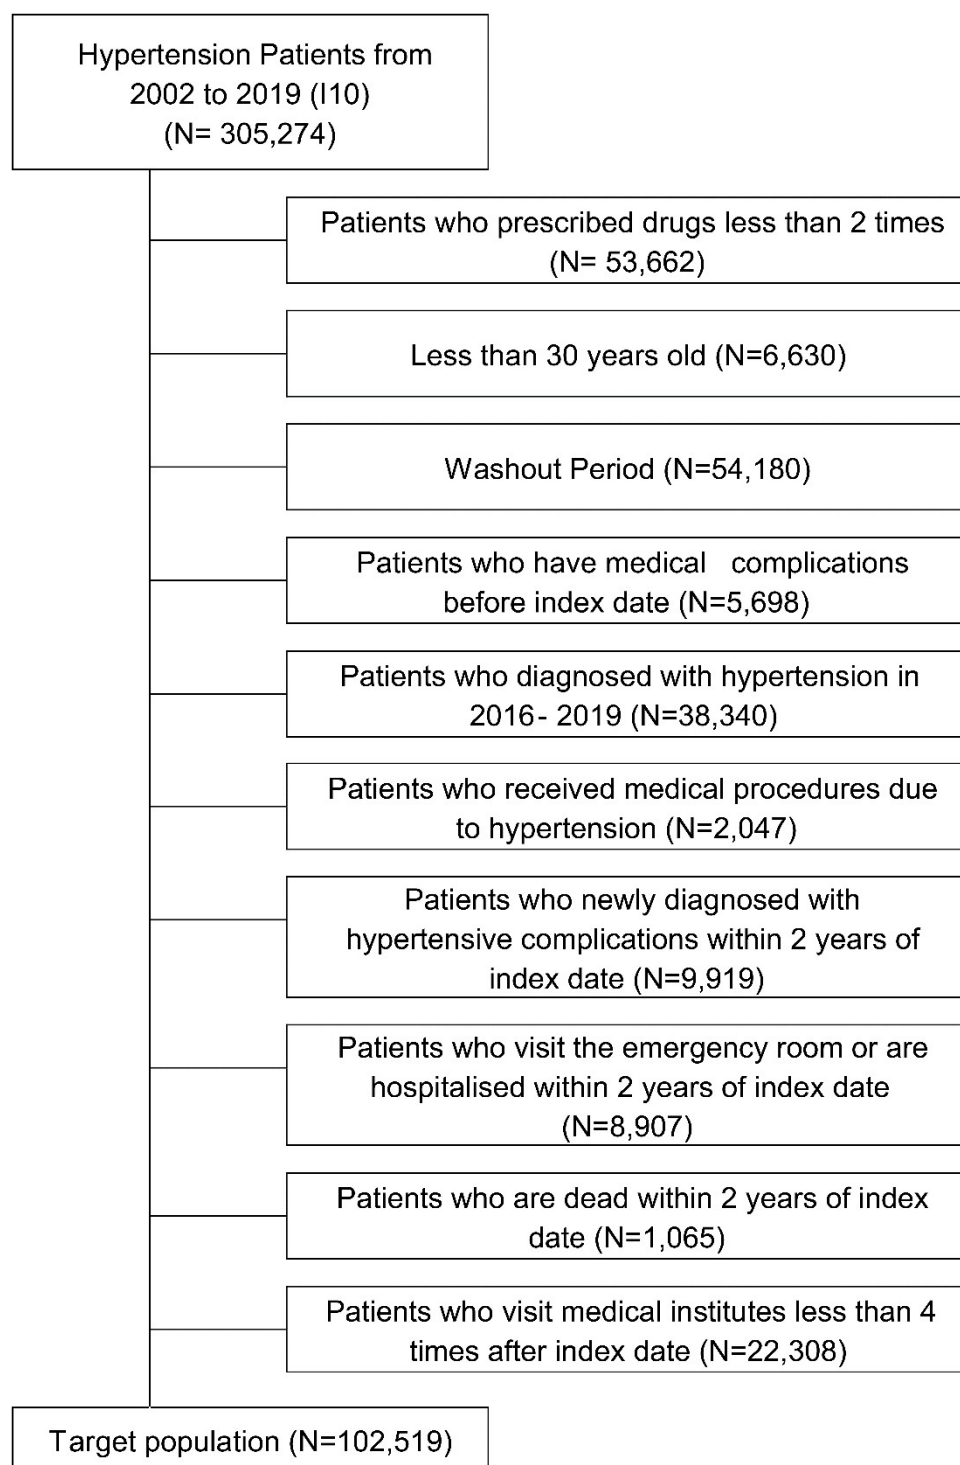



**Supplementary Figure 2.** Kaplan–Meier Curve of medical complications according to Continuity of Care (COC) level

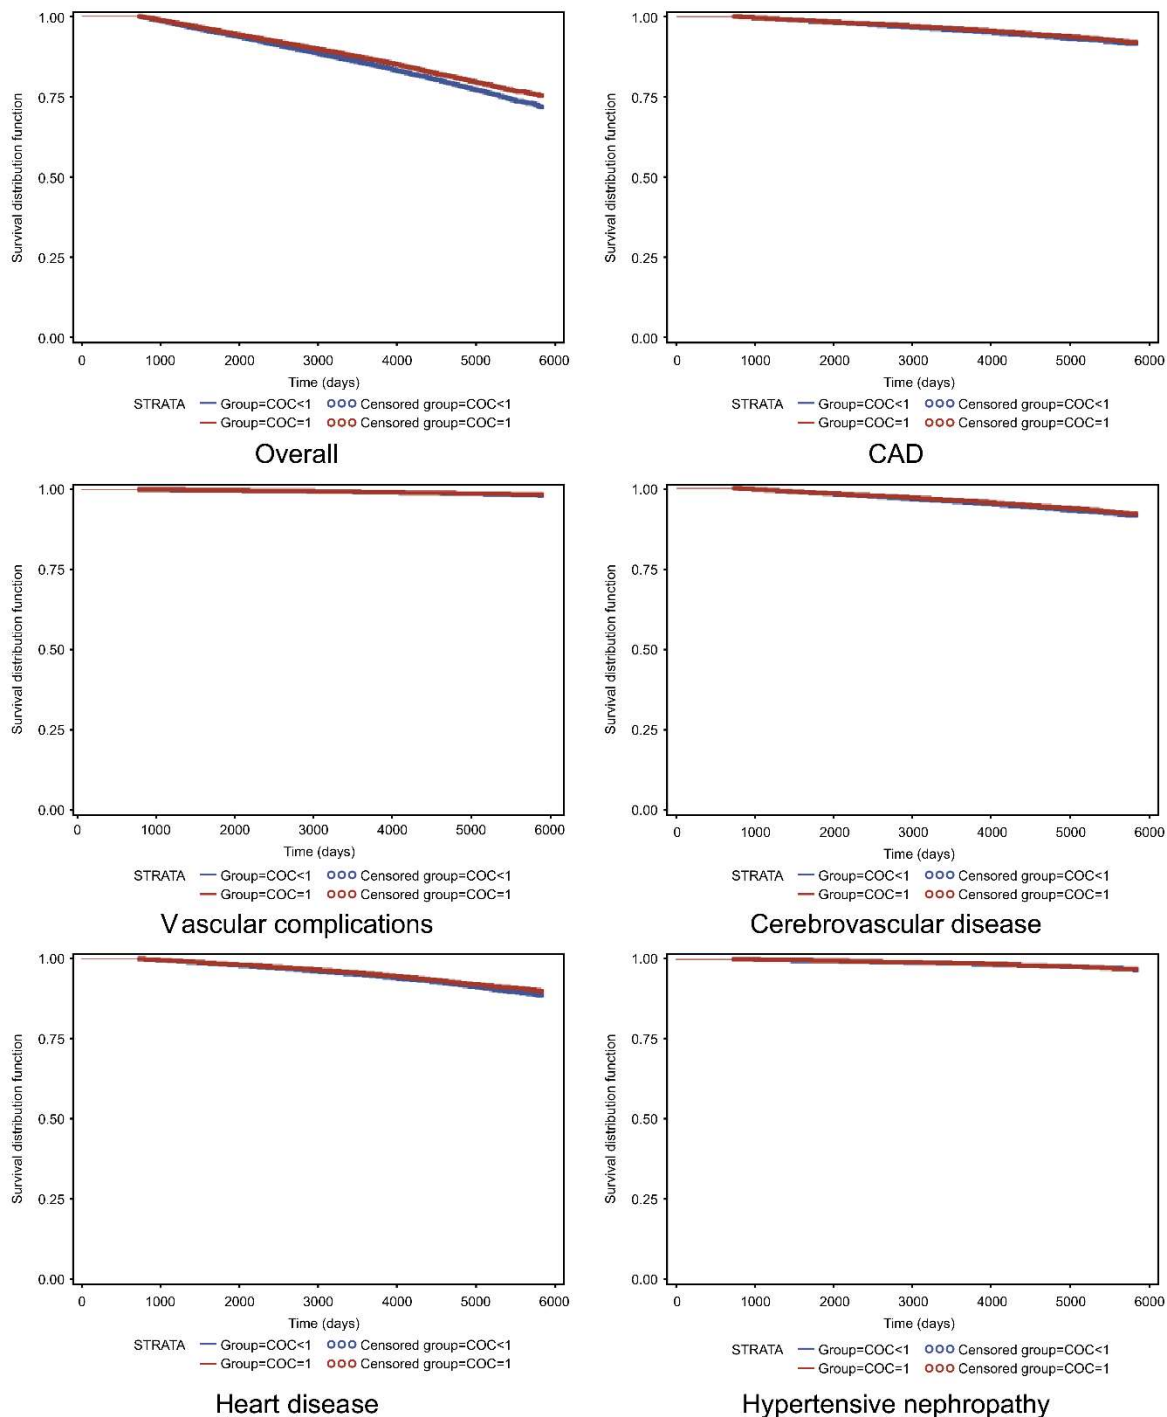

**Supplementary Figure 3.** Kaplan–Meier Curve of medical complications according to medicine possession ratio (MPR) level

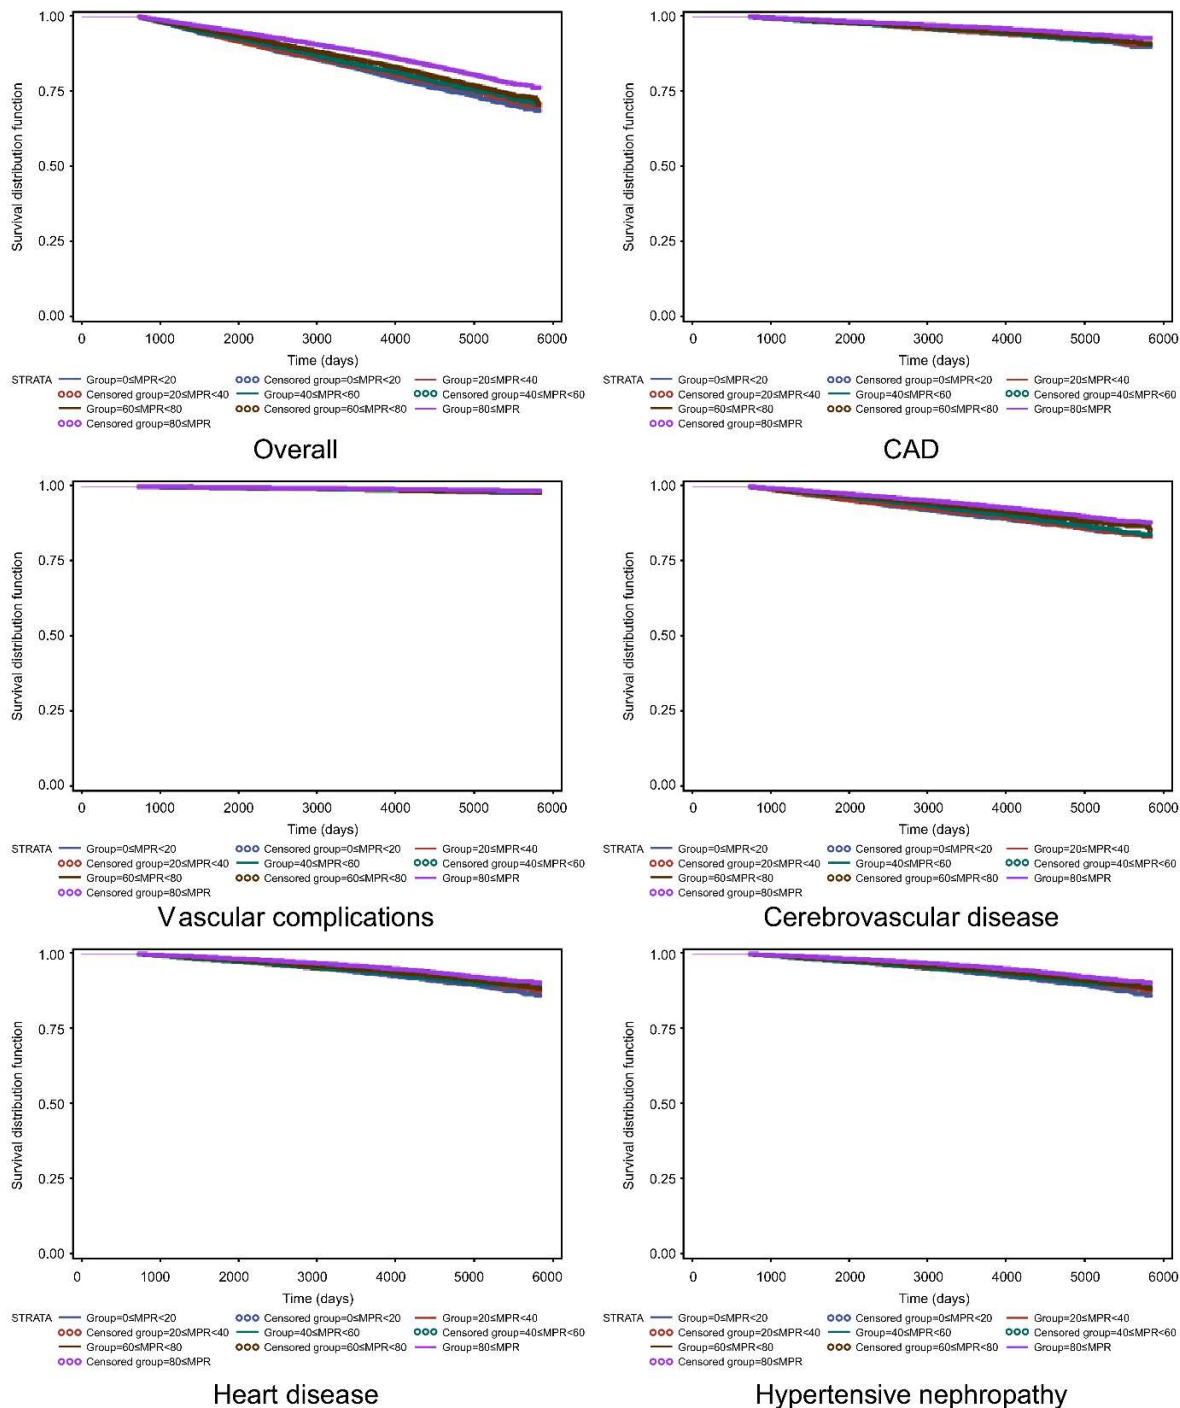

## STROBE Statement—checklist of items that should be included in reports of observational studies

|                              | Item No | Recommendation                                                                                                                                                                                                                                                                                                                                                                                                                                                         | Page No |
|------------------------------|---------|------------------------------------------------------------------------------------------------------------------------------------------------------------------------------------------------------------------------------------------------------------------------------------------------------------------------------------------------------------------------------------------------------------------------------------------------------------------------|---------|
| <b>Title and abstract</b>    | 1       | (a) Indicate the study's design with a commonly used term in the title or the abstract                                                                                                                                                                                                                                                                                                                                                                                 | 1       |
|                              |         | (b) Provide in the abstract an informative and balanced summary of what was done and what was found                                                                                                                                                                                                                                                                                                                                                                    | 2-3     |
| <b>Introduction</b>          |         |                                                                                                                                                                                                                                                                                                                                                                                                                                                                        |         |
| Background/rationale         | 2       | Explain the scientific background and rationale for the investigation being reported                                                                                                                                                                                                                                                                                                                                                                                   | 4-5     |
| Objectives                   | 3       | State specific objectives, including any prespecified hypotheses                                                                                                                                                                                                                                                                                                                                                                                                       | 5       |
| <b>Methods</b>               |         |                                                                                                                                                                                                                                                                                                                                                                                                                                                                        |         |
| Study design                 | 4       | Present key elements of study design early in the paper                                                                                                                                                                                                                                                                                                                                                                                                                | 5-6     |
| Setting                      | 5       | Describe the setting, locations, and relevant dates, including periods of recruitment, exposure, follow-up, and data collection                                                                                                                                                                                                                                                                                                                                        | 5-6     |
| Participants                 | 6       | (a) <i>Cohort study</i> —Give the eligibility criteria, and the sources and methods of selection of participants. Describe methods of follow-up<br><i>Case-control study</i> —Give the eligibility criteria, and the sources and methods of case ascertainment and control selection. Give the rationale for the choice of cases and controls<br><i>Cross-sectional study</i> —Give the eligibility criteria, and the sources and methods of selection of participants | 6       |
|                              |         | (b) <i>Cohort study</i> —For matched studies, give matching criteria and number of exposed and unexposed<br><i>Case-control study</i> —For matched studies, give matching criteria and the number of controls per case                                                                                                                                                                                                                                                 | NA      |
| Variables                    | 7       | Clearly define all outcomes, exposures, predictors, potential confounders, and effect modifiers. Give diagnostic criteria, if applicable                                                                                                                                                                                                                                                                                                                               | 6       |
| Data sources/<br>measurement | 8*      | For each variable of interest, give sources of data and details of methods of assessment (measurement). Describe comparability of assessment methods if there is more than one group                                                                                                                                                                                                                                                                                   | 6-7     |
| Bias                         | 9       | Describe any efforts to address potential sources of bias                                                                                                                                                                                                                                                                                                                                                                                                              | 5       |
| Study size                   | 10      | Explain how the study size was arrived at                                                                                                                                                                                                                                                                                                                                                                                                                              | 5       |
| Quantitative variables       | 11      | Explain how quantitative variables were handled in the analyses. If applicable, describe which groupings were chosen and why                                                                                                                                                                                                                                                                                                                                           | 6       |
| Statistical methods          | 12      | (a) Describe all statistical methods, including those used to control for confounding                                                                                                                                                                                                                                                                                                                                                                                  | 7       |
|                              |         | (b) Describe any methods used to examine subgroups and interactions                                                                                                                                                                                                                                                                                                                                                                                                    | 7       |
|                              |         | (c) Explain how missing data were addressed                                                                                                                                                                                                                                                                                                                                                                                                                            | 7       |
|                              |         | (d) <i>Cohort study</i> —If applicable, explain how loss to follow-up was addressed<br><i>Case-control study</i> —If applicable, explain how matching of cases and controls was addressed<br><i>Cross-sectional study</i> —If applicable, describe analytical methods taking account of sampling strategy                                                                                                                                                              | 7       |
|                              |         | (e) Describe any sensitivity analyses                                                                                                                                                                                                                                                                                                                                                                                                                                  | NA      |

Continued on next page

| <b>Results</b>           |     |                                                                                                                                                                                                              |       |
|--------------------------|-----|--------------------------------------------------------------------------------------------------------------------------------------------------------------------------------------------------------------|-------|
| Participants             | 13* | (a) Report numbers of individuals at each stage of study—eg numbers potentially eligible, examined for eligibility, confirmed eligible, included in the study, completing follow-up, and analysed            | 8-12  |
|                          |     | (b) Give reasons for non-participation at each stage                                                                                                                                                         | 8     |
|                          |     | (c) Consider use of a flow diagram                                                                                                                                                                           | N/A   |
| Descriptive data         | 14* | (a) Give characteristics of study participants (eg demographic, clinical, social) and information on exposures and potential confounders                                                                     | 8-12  |
|                          |     | (b) Indicate number of participants with missing data for each variable of interest                                                                                                                          | NA    |
|                          |     | (c) <i>Cohort study</i> —Summarise follow-up time (eg, average and total amount)                                                                                                                             | N/A   |
| Outcome data             | 15* | <i>Cohort study</i> —Report numbers of outcome events or summary measures over time                                                                                                                          | 12-22 |
|                          |     | <i>Case-control study</i> —Report numbers in each exposure category, or summary measures of exposure                                                                                                         | N/A   |
|                          |     | <i>Cross-sectional study</i> —Report numbers of outcome events or summary measures                                                                                                                           | N/A   |
| Main results             | 16  | (a) Give unadjusted estimates and, if applicable, confounder-adjusted estimates and their precision (eg, 95% confidence interval). Make clear which confounders were adjusted for and why they were included | 12-22 |
|                          |     | (b) Report category boundaries when continuous variables were categorized                                                                                                                                    | 12-22 |
|                          |     | (c) If relevant, consider translating estimates of relative risk into absolute risk for a meaningful time period                                                                                             | N/A   |
| Other analyses           | 17  | Report other analyses done—eg analyses of subgroups and interactions, and sensitivity analyses                                                                                                               | 12-22 |
| <b>Discussion</b>        |     |                                                                                                                                                                                                              |       |
| Key results              | 18  | Summarise key results with reference to study objectives                                                                                                                                                     | 22-23 |
| Limitations              | 19  | Discuss limitations of the study, taking into account sources of potential bias or imprecision. Discuss both direction and magnitude of any potential bias                                                   | 23    |
| Interpretation           | 20  | Give a cautious overall interpretation of results considering objectives, limitations, multiplicity of analyses, results from similar studies, and other relevant evidence                                   | 22-23 |
| Generalisability         | 21  | Discuss the generalisability (external validity) of the study results                                                                                                                                        | 23-24 |
| <b>Other information</b> |     |                                                                                                                                                                                                              |       |
| Funding                  | 22  | Give the source of funding and the role of the funders for the present study and, if applicable, for the original study on which the present article is based                                                | N/A   |

\*Give information separately for cases and controls in case-control studies and, if applicable, for exposed and unexposed groups in cohort and cross-sectional studies.

**Note:** An Explanation and Elaboration article discusses each checklist item and gives methodological background and published examples of transparent reporting. The STROBE checklist is best used in conjunction with this article (freely available on the Web sites of PLoS Medicine at <http://www.plosmedicine.org/>, Annals of Internal Medicine at <http://www.annals.org/>, and Epidemiology at <http://www.epidem.com/>). Information on the STROBE Initiative is available at [www.strobe-statement.org](http://www.strobe-statement.org).

# BMJ Open

## The association between medical complications according to continuity of care and medication adherence in patients with hypertension in Korea: a national population-based cohort study

|                                 |                                                                                                                                                                                 |
|---------------------------------|---------------------------------------------------------------------------------------------------------------------------------------------------------------------------------|
| Journal:                        | <i>BMJ Open</i>                                                                                                                                                                 |
| Manuscript ID                   | bmjopen-2023-073404.R1                                                                                                                                                          |
| Article Type:                   | Original research                                                                                                                                                               |
| Date Submitted by the Author:   | 29-Apr-2023                                                                                                                                                                     |
| Complete List of Authors:       | Kim, Dayea; Korea University, Graduate School of Public Health<br>CHA, Jaewoo; Korea University, Preventive Medicine                                                            |
| <b>Primary Subject Heading</b>: | Cardiovascular medicine                                                                                                                                                         |
| Secondary Subject Heading:      | Health services research, Health policy, Medical management, Public health, Pharmacology and therapeutics                                                                       |
| Keywords:                       | Hypertension < CARDIOLOGY, Cardiology < INTERNAL MEDICINE, Primary Health Care, PREVENTIVE MEDICINE, Health policy < HEALTH SERVICES ADMINISTRATION & MANAGEMENT, PUBLIC HEALTH |
|                                 |                                                                                                                                                                                 |

SCHOLARONE™  
Manuscripts



I, the Submitting Author has the right to grant and does grant on behalf of all authors of the Work (as defined in the below author licence), an exclusive licence and/or a non-exclusive licence for contributions from authors who are: i) UK Crown employees; ii) where BMJ has agreed a CC-BY licence shall apply, and/or iii) in accordance with the terms applicable for US Federal Government officers or employees acting as part of their official duties; on a worldwide, perpetual, irrevocable, royalty-free basis to BMJ Publishing Group Ltd ("BMJ") its licensees and where the relevant Journal is co-owned by BMJ to the co-owners of the Journal, to publish the Work in this journal and any other BMJ products and to exploit all rights, as set out in our [licence](#).

The Submitting Author accepts and understands that any supply made under these terms is made by BMJ to the Submitting Author unless you are acting as an employee on behalf of your employer or a postgraduate student of an affiliated institution which is paying any applicable article publishing charge ("APC") for Open Access articles. Where the Submitting Author wishes to make the Work available on an Open Access basis (and intends to pay the relevant APC), the terms of reuse of such Open Access shall be governed by a Creative Commons licence – details of these licences and which [Creative Commons](#) licence will apply to this Work are set out in our licence referred to above.

Other than as permitted in any relevant BMJ Author's Self Archiving Policies, I confirm this Work has not been accepted for publication elsewhere, is not being considered for publication elsewhere and does not duplicate material already published. I confirm all authors consent to publication of this Work and authorise the granting of this licence.

1  
2  
3  
4 1 **The association between medical complications according to continuity**  
5  
6 2 **of care and medication adherence in patients with hypertension in**  
7  
8  
9 3 **Korea: a national population-based cohort study**  
10  
11  
12 4

13  
14 5 Dayea Kim,<sup>2</sup> MPH, Jaewoo Cha,<sup>1\*</sup> MPH

15  
16 6 Dayea Kim: 0000-0003-0443-9291

17  
18 7 Jaewoo Cha: 0000-0002-7966-1551  
19  
20  
21 8

22  
23 9 <sup>1</sup> Department of Preventive Medicine, Korea University College of Medicine, Seoul, Republic  
24  
25 10 of Korea

26  
27 11 <sup>2</sup> Graduate School of Public Health, Korea University College of Medicine, Seoul, Republic  
28  
29 12 of Korea  
30  
31  
32 13

33  
34 14 **\*Correspondence to:** Jaewoo Cha, MPH

35  
36 15 Department of Preventive Medicine, Korea University College of Medicine

37  
38 16 Seoul, 02841, Republic of Korea

39  
40 17 Phone: +82 10-5766-7651

41  
42 18 Fax: +82 2-927-7220

43  
44 19 E-mail: [cha7651@naver.com](mailto:cha7651@naver.com)  
45  
46  
47  
48  
49  
50  
51  
52  
53  
54  
55  
56  
57  
58  
59  
60

22 The corresponding author attests that all listed authors meet authorship criteria and that no  
23 others meeting the criteria have been omitted.  
24  
25

1  
2  
3 26  
4  
5 27  
6  
7  
8 28  
9  
10 29  
11  
12 30  
13  
14 31  
15  
16 32  
17  
18 33  
19  
20 34  
21  
22 35  
23  
24 36  
25  
26 37  
27  
28 38  
29  
30 39  
31  
32 40  
33  
34 41  
35  
36 42  
37  
38 43  
39  
40 44  
41  
42 45  
43  
44 46  
45  
46 47  
47  
48 48  
49  
50 49  
51  
52 50  
53  
54  
55  
56  
57  
58  
59  
60

For peer review only



1  
2  
3 51 **Abstract**  
4

5 52 **Objectives:** To analyse the differences in hypertensive complications according to continuity  
6  
7  
8 53 of care and medication adherence in patients with ambulatory care-sensitive conditions.  
9

10 54 **Design:** A national population-based retrospective cohort study.  
11

12 55 **Setting:** Medical claims data at all levels of hospitals in Korea.  
13

14 56 **Participants:** 102,519 patients diagnosed with hypertension were included in this study.  
15

16  
17 57 **Main outcome measures:** The levels of continuity of care and medication adherence were  
18  
19 58 estimated within the initial 2 years of the follow-up period, and the incidence of medical  
20  
21 59 complications within the subsequent 16 years. We utilised a level of continuity of care (COC)  
22  
23 60 to measure continuity of care and medication possession ratio (MPR) to measure medication  
24  
25 61 adherence.  
26  
27

28 62 **Results:** The average level of COC in the hypertension group was 0.8112. The average  
29  
30 63 proportion of MPR in the hypertension group was 73.3%. Continuity of care in patients with  
31  
32 64 hypertension showed varying results: the low COC group had a 1.14-fold increased risk of  
33  
34 65 medical complications compared to the high COC group. In terms of a level of medication  
35  
36 66 adherence in patients with hypertension, the 0–19% MPR group had a 1.5-fold risk of  
37  
38 67 medical complications relative to the 80–100% MPR group.  
39  
40

41  
42 68 **Conclusions:** In patients with hypertension, high continuity of care and medication adherence  
43  
44 69 for the first 2 years of diagnosis can help prevent medical complications and promote  
45  
46 70 patients' health. Therefore, effective strategies to improve continuity of care and medication  
47  
48 71 adherence are required. Future research should include some factors that may affect the  
49  
50 72 incidence of hypertensive complications such as familial aggregation, and hazard  
51  
52 73 stratification by the level of blood pressure were not considered, so there may be residual  
53  
54 74 confounding and still room for improvement.  
55  
56  
57  
58  
59  
60

1  
2  
3 76 **Keywords:** Continuity of care, medication adherence, ambulatory care-sensitive conditions,  
4  
5 77 hypertension, retrospective cohort  
6  
7  
8 78

9  
10 79 **Strengths and limitations of this study**  
11  
12 80

- 13  
14  
15 81 • The study had a long follow-up period (18 years) and included over 100,000 participants,  
16  
17 82 which are regarded as indicators of relatively higher reliability and validity in cohort  
18  
19 83 studies according to the European Society of Cardiology.  
20  
21  
22 84 • The database we utilised contained data on health service use of over 50,000,000 Korean  
23  
24 85 citizens' (99.7% of whole population), which means nationally representative.  
25  
26  
27 86 • Hypertension (ICD-11 code=I.10) was selected from the ACSCs list in the Agency of  
28  
29 87 Health Research and Quality standard and hypertensive complications were selected  
30  
31 88 according to the World Health Organization and the advice from specialists in internal  
32  
33 89 medicine.  
34  
35  
36 90 • Due to the retrospective nature of the study, the possibility of bias, including  
37  
38 91 misclassification bias, may not be excluded.  
39  
40  
41 92 • Some factors that may affect the incidence of hypertensive complications such as familial  
42  
43 93 aggregation, and hazard stratification by the level of blood pressure were not considered.  
44  
45  
46  
47  
48 95  
49  
50 96  
51  
52 97  
53  
54 98  
55  
56  
57 99  
58  
59 100  
60

## 101 INTRODUCTION

102 Hypertension is one of the most important health issues worldwide (1). In terms of the  
103 global prevalence of hypertension, almost 1.4 billion people, which is almost 20% of the  
104 world population, have hypertension (2). In an evaluation of all risk factors by the World  
105 Health Organization and the Global Burden of Disease Study hypertension ranked first as a  
106 contributor to the burden of disease at 20%, with a contribution greater than that of obesity  
107 (3). Hypertension progresses in approximately 50% of cases caused by coronary artery  
108 disease or heart disease, approximately 33% of cases caused by stroke, and 10–15% of cases  
109 caused by renal disease (1). It is closely related to ischemic heart disease, which is the leading  
110 cause of death worldwide (4).

111 Hypertension is classified as an ambulatory care-sensitive condition, which means that  
112 early diagnosis and intervention are beneficial in preventing the medical complications that  
113 may result in death, hospitalisation, and major medical costs (5). Ambulatory care-sensitive  
114 conditions have been classified by the Agency of Health Research and Quality (AHRQ), and  
115 16 diseases selected by the AHRQ can be prevented from progressing if they are treated  
116 effectively in a timely manner by providing prevention and medical services (6). By treating  
117 and managing these conditions early, hospitalisation due to aggravation or complications of  
118 the disease can be reduced (6). Early intervention in an outpatient setting slows the onset and  
119 progression of the disease (7) and prevents avoidable hospitalisation (5,8).

120 Ambulatory care-sensitive conditions are representative indicators for evaluating the  
121 accessibility and quality of primary care (9). Several studies have focused on hypertension,  
122 continuity of care (COC), and medication adherence (10-12). However, the study design of  
123 some studies was limited by the setting, and the small number of patients included (10-12).  
124 Over 50 million patients are registered in the National Health Insurance Service (NHIS)  
125 database (13). Patient data include not only physician visit information, but also the

1  
2  
3 126 prescription data for each visit (13). As National Health Insurance (NHI) is mandatory for  
4  
5 127 every citizen in Korea, the reliability of the data is high, and data are representative of the  
6  
7  
8 128 population on a national level (13).  
9

10 129 The objective of this study was to analyse the effect of providing timely and effective  
11  
12 130 ambulatory care to patients with early hypertension on preventing the occurrence of medical  
13  
14 131 complications using COC and the medication possession ratio (MPR) as indicators of  
15  
16  
17 132 effective care. A secondary objective was to assess the outcomes of hypertension according  
18  
19 133 to the level of hospital at which patients were treated.  
20  
21  
22 134

## 23 24 135 **METHODS**

25  
26 136 This national, population-based, retrospective cohort study investigated the incidence of  
27  
28 137 hypertension from 1 January 2002 to 31 December 2019 among the general population in  
29  
30 138 Korea. Unlike previous studies on the risk of complications according to the COC and  
31  
32  
33 139 medication adherence in the first 2 years, this study examined the time variance, including the  
34  
35 140 time of the first visit to the medical institution and the patient's age (greater than 30 years)  
36  
37 141 (14-15).  
38  
39  
40 142

### 41 42 143 **Inclusion and exclusion of participants**

43  
44 144 This study used the data of 1.4 million individuals from the NHIS database from 2002 to  
45  
46 145 2019 selected using stratified sampling (13). The NHIS database, which includes the medical  
47  
48 146 records of more than 50 million people, is stratified by sex and age group (18 strata) (13). To  
49  
50 147 maintain representativeness, sampling was performed according to the demographic  
51  
52  
53 148 characteristics and income quintiles in the Republic of Korea (13). In addition, these cohort  
54  
55  
56 149 data were linked to the national health check-up database of over 66% of the general  
57  
58 150 population (over 33 million) in Korea. Furthermore, information on the cause of death was  
59  
60

1  
2  
3 151 provided by linkage to death data from the National Statistical Office (16-17).  
4

5 152 After excluding patients with missing data for any of the key variables, data on the  
6  
7 153 medical claims of 102,519 patients with hypertension (ICD code= I.10) were extracted from  
8  
9 154 the NHIS database, covering the 2002–2019 period, and included in the analysis. No patients  
10  
11 155 were lost to follow-up because all medical records were registered through the electronic  
12  
13 156 medical record system and tracked in accordance with the National Health Insurance Act  
14  
15 157 established by the Korean government.  
16  
17

18  
19 158 To avoid bias, we excluded patients who were prescribed drugs less than twice  
20  
21 159 (n=53,662) to enable proper measurement of the MPR; patients aged <30 years (n=6,630) to  
22  
23 160 exclude low-risk patients; patients who visited medical institutions in 2002 and 2003  
24  
25 161 (n=54,180) as a washout period; patients with medical complications (n=5,698) to prevent  
26  
27 162 contamination of results on the incidence of complications; patients who were diagnosed with  
28  
29 163 hypertension from 2016–2019 (n=38,340) to maintain the baseline characteristics of the  
30  
31 164 target population; patients who had taken related drugs or undergone related procedures or  
32  
33 165 surgeries according to the AHRQ guidelines on ambulatory care-sensitive conditions  
34  
35 166 (n=2,047); patients who had visited the medical institution before the index date due to  
36  
37 167 hypertension (n=9,919), or who visited the emergency room or were hospitalised within 2  
38  
39 168 years of the index date according to the AHRQ guidelines on ambulatory care-sensitive  
40  
41 169 conditions (n=8,907) to avoid unequal baseline characteristics; patients who died within 2  
42  
43 170 years of the index date (n=1,065) for the washout period of mortality and severity; and  
44  
45 171 patients who visited medical institutions less than four times after the index date (n=22,308)  
46  
47 172 to enable proper measurement of COC. After these exclusions, retrospective data of 102,519  
48  
49 173 patients (out of 1 million members of the general population of Korea) were included in the  
50  
51 174 analysis (Figure 1).  
52  
53  
54  
55  
56  
57  
58  
59  
60

## 176 **Measurements**

177 COC was defined as “continuance of care by a healthcare provider to meet a patient's  
178 medical needs providing high quality and harmonised care” (18). Additionally, with a good  
179 level of continuous care with doctors, the hospitalisation rate, prevalence, and the number of  
180 medical visits are reduced (19). Methods for measuring COC include the Usual Provider of  
181 Care index, most frequent primary care, and the modified modified continuity index (20).

182 Shortell identified four core factors required for COC (21). First, data should be for  
183 individuals. Second, analysed data should be distinguished and comparable when individuals  
184 visit different medical institutions and providers. Third, COC should reflect the total number  
185 of visits for care. Finally, appropriate referral patterns should also be considered (22). Korea  
186 has a fee for service system without a proper referral system (22).

187 The COC index measures COC on a scale of 0 to 1, based on all visits. The COC index  
188 weights both the frequency of visits to each provider and the dispersion of visits between  
189 providers. If every visit for medical services to one provider, the COC index will be 1. The  
190 formula is:

$$191 \quad COC = \frac{\sum_{j=1}^M n_j^2 - N}{N(N-1)}$$

192 N = total number of ambulatory care

193  $n_j$  = number of visits to provider

194 M = total number of provider

195  
196 The major drawback of this method is it is not applicable if there are fewer than four  
197 visits (23). This is not an ultimate threshold of COC, but is used in practice.

198 MPR is a common method of measuring medication adherence in general practice. The  
199 minimum number of prescriptions is two. The formula for MPR is:

1  
2  
3  
4 200 
$$MPR = \frac{\text{Sum of days' supply for all fills in a period}}{\text{\# of days in period}}$$

5  
6 201 MPR is usually estimated using prescription data, for example, prescription data was  
7  
8 202 provided with the defined daily dose. A MPR value of 1 means complete medication  
9  
10 203 adherence.

11  
12  
13 204 The major limitation of MPR estimation is that it is based on retrospective data review,  
14  
15 205 and patients may have received unrecorded medication. However, due to the Korean  
16  
17 206 pharmaceutical information system, unrecorded prescription cannot occur. Another limitation  
18  
19 207 of the MPR method is sharing medicine between family members. However, sharing of  
20  
21 208 medication is likely to be minimal, because each medical appointment is scheduled according  
22  
23 209 to the number of days medication prescribed. the major strength of the MPR method is that  
24  
25 210 research diseases containing data on changeable parameters such as blood pressure  
26  
27 211 (hypertension), HbA1c and fasting blood glucose (diabetes), researchers can closely estimate  
28  
29 212 patient health status based on the drugs that they are prescribed.

30  
31  
32  
33 213 Medication adherence refers to the degree of compliance with medications prescribed by  
34  
35 214 a doctor (24). Accurate tracking of prescription data is essential for analysing medication  
36  
37 215 adherence as well as effectively predicting healthcare costs and utilisation (23). To measure  
38  
39 216 medication adherence, the MPR and proportion of days covered are usually used for analysis  
40  
41 217 (12). We used the COC index and MPR to estimate medication adherence using NHI data,  
42  
43 218 which tracks all prescription data (12). We received professional advice from specialists in  
44  
45 219 internal medicine and cardiology for the selection of antihypertensive drugs (Supplementary  
46  
47 220 table 1).

48  
49  
50  
51 221 Medical complications of hypertension—coronary artery disease, vascular complications,  
52  
53 222 cerebrovascular disease, heart disease, and hypertensive nephropathy—were selected based  
54  
55 223 on WHO documentation (1). The WHO documentation also includes cognitive impairment as  
56  
57  
58  
59  
60

224 a type of hypertensive complication (1), but as data on mental examination was unavailable,  
225 we were unable to include cognitive impairment as a complication in our study.

226

### 227 **Statistical analysis**

228 Explanatory variables influencing COC and the occurrence of complications in patients  
229 with hypertension included sex, age, insurance type, income, outpatient status, COC, MPR  
230 level of the patient, number of visits, number of providers, main medical institution, and  
231 comorbidities. Patients with values for any of these variables were excluded. There was no  
232 loss to follow-up because the dataset was based on the medical record system and was  
233 analysed retrospectively. Subgroup analysis was performed for primary care visits to assess  
234 the efficiency of the healthcare system in Korea. The statistical significance of differences  
235 between groups was assessed using Student's t-test and analysis of variance. P values <0.05  
236 were regarded as statistically significant. The Kruskal–Wallis test and Wilcoxon rank-sum  
237 test were used to compare continuous variables that were not normally distributed, and  
238 Fisher's exact test was used to compare categorical variables between groups.

239 Insurance type is divided into two categories, Health Insurance beneficiaries and medical  
240 aid recipients. The NHI system in Korea enables medical aid recipients to obtain free health  
241 services because it is based on the lowest level of household income.

242 Income was divided into ten categories as described in supplementary table 2.

243 COC was divided into two categories: high (COC index =1) and low (COC index <1).  
244 Most COC-related research in Korea uses this standard because overall levels of COC in  
245 Korea is high compared with those in other countries. According to Organization for  
246 Economic Cooperation and Development (OECD) statistics on healthcare utilisation, Korea  
247 has a three-fold higher outpatient and inpatient medical care use than the OECD average (25).  
248 In this study, the mean COC index was 0.8112, confirming the high level of COC in Korea.



1  
2  
3 249 In previous studies, the MPR has generally been divided into three categories (>80%, 50–  
4  
5 250 80%, and <50% of MPR) or two categories (>60% and <60% of MPR) (26, 27). However,  
6  
7  
8 251 we decided to use five categories (excellent: 80–100%, good: 60–80%, normal: 40–60%, bad:  
9  
10 252 20–40%, and very bad: 0–20%) to enable more detailed analysis of the MPR.

11  
12 253 Outpatient status, number of visits, number of providers, main medical institution are  
13  
14 254 required factors for calculating the COC level. We used the Charlson Comorbidity Index to  
15  
16  
17 255 measure comorbidities (28).

18  
19 256 Categorical variables associated with the level of COC (low vs high), were compared  
20  
21 257 using the chi-square test. A comparison of complications according to the COC and MPR was  
22  
23  
24 258 performed using Kaplan–Meier survival curves and log-rank tests. The differences in medical  
25  
26 259 complications according to COC and medication adherence were examined. The Cox  
27  
28 260 proportional hazards model was used to compare the risk. Hazard ratios (HRs) and 95%  
29  
30  
31 261 confidence intervals (CIs) were estimated using multivariable Cox proportional hazards  
32  
33 262 regression.

### 34 35 263 36 37 264 **Ethical issues**

38  
39 265 Ethics approval for the study was obtained from the Institutional Review Board at Korea  
40  
41  
42 266 University (IRB document no. KUIRB-2021-0333-01). Informed consent was not required  
43  
44  
45 267 due to the retrospective nature of the study. The study has been prepared in accordance with  
46  
47 268 the STROBE guidelines.

### 48 49 269 50 51 270 **Patient and public involvement**

52  
53 271 We did not involve patients and public in this study because it was a retrospective study  
54  
55  
56 272 using data from the NHIS database.

57  
58 273  
59  
60

## 274 **RESULTS**

275 The average continuity of care level in the hypertension group was 0.8112. The average  
276 medication possession ratio in the hypertension group was 73.3%.

### 277 **General characteristics of patients with hypertension**

278 The patient characteristics are shown in supplementary table 1. Of the patients, 51,522  
279 (50.3%) were male, and 50,997 (49.7%) were female. The 50–59-years aged group was the  
280 largest age group (30.7%), followed by the aged 60–69-years (24.5%) and 40–49-years  
281 (20.7%) age groups. The vast majority of patients (94.0%) were covered by NHI. The largest  
282 income categories were the 9th–10th decile (27.0%), followed by the 7th–8th decile (21.5%)  
283 and the 5th–6th decile (18.1%). The most common outpatient visit categories were 7–9 visits  
284 (29.7%), followed by 10–12 visits (29.5%), and 13 or more visits (25.0%). Of the patients,  
285 50.9% visited only one provider and 31.0% visited two providers. The majority of patients  
286 visited clinics (70.8%). The most common comorbidities were dyslipidemia (49.8%) and  
287 diabetes (28.7%). Approximately half the patients (50.9%) had a high level of COC. The  
288 majority of patients (55.5%) had an excellent MPR. The most frequent years of diagnosis  
289 were 2004 (10.1%), 2005 (12.1%), and 2006 (10.1%).

### 291 **Risk of complications of hypertension according to the continuity of care level and** 292 **medication adherence**

293 Compared with the high COC group, participants in the low COC group had a  
294 significantly higher risk of complications (HR: 1.14, 95% CI: 1.10–1.17) (Table 1).

295

296 **Table 1. Risk of complications of hypertension according to the continuity of care level**

| COC level | No. of patients | No. of events | IR per 1000 PYR | HR <sup>a</sup> (95% CI)   | <i>p</i>         |
|-----------|-----------------|---------------|-----------------|----------------------------|------------------|
| High      | 52,179          | 7,143         | 15.4            | Ref                        |                  |
| Low       | 50,340          | 8,142         | 17.7            | <b>1.14 (1.10–1.17)***</b> | <b>&lt;0.001</b> |

297 CI, confidence interval; COC, continuity of care; HR, hazard ratio; IR, incidence rate; PYR, person-years at risk

298 <sup>a</sup> Adjusted for sex, age, insurance type, income, number of visits, number of providers, level of hospital, and  
299 Charlson Comorbidity Index

300 \*\*\*,<0.001

301 Compared with the excellent MPR group, the risk of developing hypertensive  
302 complications was significantly higher in the good, normal, bad, and very bad MPR groups  
303 (Table 2).

304 **Table 2. Risk of hypertensive complications according to the medication possession ratio**

| MPR level | No. of patients | No. of events | IR per 1000 PYR | HR <sup>a</sup> (95% CI)   | <i>p</i>         |
|-----------|-----------------|---------------|-----------------|----------------------------|------------------|
| Excellent | 56,939          | 7,143         | 14.1            | Ref                        |                  |
| Good      | 16,012          | 2,695         | 17.9            | <b>1.24 (1.18-1.29)***</b> | <b>&lt;0.001</b> |
| Normal    | 11,808          | 2,146         | 19.5            | <b>1.36 (1.29-1.42)***</b> | <b>&lt;0.001</b> |
| Bad       | 9,996           | 1,834         | 20.3            | <b>1.42 (1.35-1.50)***</b> | <b>&lt;0.001</b> |
| Very bad  | 7,764           | 1,467         | 21.4            | <b>1.50 (1.42-1.59)***</b> | <b>&lt;0.001</b> |

305 HR, hazard ratio; IR, incidence rate; MPR, medication possession ratio; PYR, person-years at risk

306 <sup>a</sup> Adjusted for sex, age, insurance type, income, number of visits, number of providers, level of hospital, and  
307 Charlson Comorbidity Index

308 \*\*\*,<0.001

### 310 **Risk of specific types of hypertension complication according to the continuity of care** 311 **level and medication adherence**

312 Kaplan–Meier survival curves showing the time until complications occurred according to  
313 the COC and medication adherence are shown in supplementary figures 1 and 2, respectively.

314 The risks of developing coronary artery disease, vascular complications, cerebrovascular  
 315 disease, heart disease, and hypertensive nephropathy according to each COC level and  
 316 medication adherence level are shown in tables 3 and 4, respectively. Patients with diabetes  
 317 and high cholesterol had a higher incidence of hypertensive complications than patients  
 318 without diabetes and high cholesterol, respectively.

319

320 **Table 3. Risk of medical complications of hypertension according to the continuity of**  
 321 **care level**

| Complication             | Parameter                | COC level |                            |
|--------------------------|--------------------------|-----------|----------------------------|
|                          |                          | High      | Low                        |
| CAD                      | Events (N)               | 2,117     | 2,350                      |
|                          | IR per 1000 PYR          | 4.4       | 4.9                        |
|                          | HR <sup>a</sup> (95% CI) | Ref       | <b>1.10 (1.03–1.16)**</b>  |
|                          | <i>p</i>                 | -         | <b>0.002</b>               |
| Vascular complications   | Events (N)               | 412       | 451                        |
|                          | IR per 1000 PYR          | 0.8       | 0.9                        |
|                          | HR <sup>a</sup> (95% CI) | Ref       | 1.07 (0.94–1.23)           |
|                          | <i>p</i>                 | -         | 0.302                      |
| Cerebrovascular disease  | Events (N)               | 3,639     | 4,178                      |
|                          | IR per 1000 PYR          | 7.6       | 8.7                        |
|                          | HR <sup>a</sup> (95% CI) | Ref       | <b>1.14 (1.09–1.19)***</b> |
|                          | <i>p</i>                 | -         | <b>&lt;0.001</b>           |
| Heart disease            | Events (N)               | 2,602     | 2,951                      |
|                          | IR per 1000 PYR          | 5.4       | 6.1                        |
|                          | HR <sup>a</sup> (95% CI) | Ref       | <b>1.11 (1.06–1.17)***</b> |
|                          | <i>p</i>                 | -         | <b>&lt;0.001</b>           |
| Hypertensive nephropathy | Events (N)               | 716       | 768                        |
|                          | IR per 1000 PYR          | 1.5       | 1.6                        |

| Complication | Parameter                | COC level |                  |
|--------------|--------------------------|-----------|------------------|
|              |                          | High      | Low              |
|              | HR <sup>a</sup> (95% CI) | Ref       | 1.05 (0.95–1.16) |
|              | <i>p</i>                 | -         | 0.367            |

322 CAD, coronary artery disease; CI, confidence interval; COC, continuity of care; HR, hazard ratio; IR, incidence  
 323 rate; PYR, person-years at risk

324 <sup>a</sup> Adjusted for sex, age, insurance type, income, number of visits, number of providers, level of hospital, and  
 325 Charlson Comorbidity Index

326 \*\*, <.01 \*\*\*,<0.001

327 **Table 4. Risk of medical complications of hypertension according to the medication possession ratio**

| Complication            | Parameter                | MPR level |                            |                            |                            |                            |
|-------------------------|--------------------------|-----------|----------------------------|----------------------------|----------------------------|----------------------------|
|                         |                          | Excellent | Good                       | Normal                     | Bad                        | Very bad                   |
| CAD                     | Events (N)               | 2,081     | 811                        | 635                        | 535                        | 405                        |
|                         | IR per 1000 PYR          | 4         | 5.1                        | 5.5                        | 5.6                        | 5.5                        |
|                         | HR <sup>a</sup> (95% CI) | Ref       | <b>1.26 (1.16–1.37)***</b> | <b>1.35 (1.23–1.47)***</b> | <b>1.38 (1.26–1.52)***</b> | <b>1.38 (1.24–1.53)***</b> |
|                         | <i>p</i>                 | -         | <b>&lt;0.001</b>           | <b>&lt;0.001</b>           | <b>&lt;0.001</b>           | <b>&lt;0.001</b>           |
| Vascular complications  | Events (N)               | 393       | 154                        | 120                        | 107                        | 89                         |
|                         | IR per 1000 PYR          | 0.7       | 1                          | 1                          | 1.1                        | 1.2                        |
|                         | HR <sup>a</sup> (95% CI) | Ref       | <b>1.25 (1.04–1.51)*</b>   | <b>1.33 (1.08–1.63)**</b>  | <b>1.45 (1.17–1.79)***</b> | <b>1.59 (1.26–2.00)***</b> |
|                         | <i>p</i>                 | -         | <b>0.018</b>               | <b>0.007</b>               | <b>0.001</b>               | <b>&lt;0.001</b>           |
| Cerebrovascular disease | Events (N)               | 3,613     | 1,312                      | 1,120                      | 997                        | 775                        |
|                         | IR per 1000 PYR          | 6.9       | 8.4                        | 9.8                        | 10.6                       | 10.8                       |
|                         | HR <sup>a</sup> (95% CI) | Ref       | <b>1.18 (1.11–1.26)***</b> | <b>1.38 (1.29–1.47)***</b> | <b>1.51 (1.41–1.62)***</b> | <b>1.54 (1.43–1.67)***</b> |
|                         | <i>p</i>                 | -         | <b>&lt;0.001</b>           | <b>&lt;0.001</b>           | <b>&lt;0.001</b>           | <b>&lt;0.001</b>           |

| Complication             | Parameter                | MPR level |                            |                            |                            |                            |
|--------------------------|--------------------------|-----------|----------------------------|----------------------------|----------------------------|----------------------------|
|                          |                          | Excellent | Good                       | Normal                     | Bad                        | Very bad                   |
| Heart disease            | Events (N)               | 2,585     | 981                        | 788                        | 659                        | 540                        |
|                          | IR per 1000 PYR          | 4.9       | 6.2                        | 6.8                        | 6.9                        | 7.4                        |
|                          | HR <sup>a</sup> (95% CI) | Ref       | <b>1.21 (1.13–1.30)***</b> | <b>1.33 (1.23–1.44)***</b> | <b>1.36 (1.25–1.48)***</b> | <b>1.47 (1.34–1.62)***</b> |
|                          | <i>p</i>                 | -         | <b>&lt;0.001</b>           | <b>&lt;0.001</b>           | <b>&lt;0.001</b>           | <b>&lt;0.001</b>           |
| Hypertensive nephropathy | Events (N)               | 633       | 278                        | 232                        | 194                        | 147                        |
|                          | IR per 1000 PYR          | 1.2       | 1.7                        | 2                          | 2                          | 2                          |
|                          | HR <sup>a</sup> (95% CI) | Ref       | <b>1.39 (1.21–1.60)***</b> | <b>1.58 (1.36–1.84)***</b> | <b>1.62 (1.38–1.90)***</b> | <b>1.62 (1.35–1.94)***</b> |
|                          | <i>p</i>                 | -         | <b>&lt;0.001</b>           | <b>&lt;0.001</b>           | <b>&lt;0.001</b>           | <b>&lt;0.001</b>           |

328 CAD, coronary artery disease; CI, confidence interval; HR, hazard ratio; MPR, medication possession ratio; PYR, person-years at risk

329 <sup>a</sup> Adjusted for sex, age, insurance type, income, number of visits, number of providers, level of hospital, and Charlson Comorbidity Index

330 \*, < .05; \*\*, <.01 \*\*\*,<0.001

1  
2  
3 331 The risk of coronary artery disease was significantly higher in the low continuity group  
4  
5 332 than the high COC group (HR: 1.10, 95% CI: 1.03–1.16) (Table 3). Compared with the  
6  
7  
8 333 excellent MPR group, the risk of coronary artery disease was significantly higher in the good,  
9  
10 334 normal, bad, and very bad MPR groups (Table 4).

11  
12 335 The risk of vascular complications did not differ significantly according to the COC level  
13  
14 336 (table 3). Compared with the excellent MPR group, the risk of vascular complications was  
15  
16  
17 337 significantly higher in the good, normal, bad, and very bad MPR groups (table 4).

18  
19 338 The risk of cerebrovascular disease was significantly higher in the low continuity group  
20  
21 339 than the high COC group (HR: 1.14, 95% CI: 1.09–1.19) (table 3). Compared with the excellent  
22  
23  
24 340 MPR group, the risk of cerebrovascular disease was significantly higher in the good, normal,  
25  
26 341 bad, and very bad MPR groups (table 4).

27  
28 342 The risk of heart disease was significantly higher in the low COC group than the high COC  
29  
30 343 group (HR: 1.11, 95% CI: 1.06–1.17) (table 3). Compared with the excellent MPR group, the  
31  
32  
33 344 risk of heart disease was significantly higher in the good, normal, bad, and very bad MPR  
34  
35 345 groups (table 4).

36  
37 346 The risk of hypertensive nephropathy did not differ significantly according to the COC  
38  
39 347 level (table 3). Compared with the excellent MPR group, the risk of hypertensive nephropathy  
40  
41  
42 348 was significantly higher in the good, normal, bad, and very bad MPR groups (table 4).

43  
44 349  
45  
46 350 **Subgroup analysis of risk of medical complications according to continuity of care and**  
47  
48 351 **medication possession ratio levels in primary care clinics**

49  
50  
51 352 A subgroup analysis of the risk of medical complications according to the COC level and  
52  
53 353 MPR in patients with hypertension attending primary care clinics showed that the risk of  
54  
55  
56 354 developing complications was significantly higher in in the the low COC group than the high  
57  
58 355 COC group (HR: 1.16, 95% CI: 1.12–1.21). Compared with the excellent MPR group, the  
59  
60



1  
2  
3 356 risk of developing hypertensive complications was significantly higher in the good, normal,  
4  
5 357 bad, and very bad MPR groups. Compared with patients who had 4–6 visits, the risk of  
6  
7 358 developing medical complications was significantly lower in patients with 7–9 visits, 10–12  
8  
9 359 visits, or 13 visits or more (Supplementary table 3).

360

## 361 **DISCUSSION**

362 This study highlights the fact that the COC and order of establishing health policies can  
363 increase the response and lower the risk of long-term complications within the first two years  
364 of diagnosis of hypertension. In this study, COC and medication adherence were associated  
365 with the occurrence of complications caused by hypertension. Overall, for patients with  
366 hypertension in the low as compared to the high COC group, the risk of complications was  
367 significantly higher. Similarly, the risk of developing coronary artery disease, cerebrovascular  
368 disease, and heart disease was greater in the low as compared to the high COC group. In  
369 terms of overall medication adherence, in comparison to the excellent medication adherence  
370 group (80–100%), the good group (60–79%), normal group (40–59%), bad group (20–39%),  
371 and very bad group (0–19%) were at significantly higher risk of developing hypertensive  
372 complications such as coronary artery disease, vascular complications, cerebrovascular  
373 disease, heart disease, and hypertensive nephropathy.

374 Other COC and MPR studies have found that patients with low medication adherence are  
375 more likely to result in progress to inpatient or mortality (HR: 1.24, 95% CI:1.18-1.29). The  
376 differences were due to the type of antihypertensive medication, follow-up period, and the  
377 differences in the definition of medication adherence. We overcame these limitations because  
378 of the 18 years follow-up period.

379 Another MPR study showed that low medication adherence is more likely to result in  
380 progress to inpatient or mortality (HR: 1.57, 95% CI:1.40-1.76). this result is similar to that

1  
2  
3 381 of our study (29).  
4

5 382 Other COC and MPR studies focused on hypertension and diabetes, and found that for  
6  
7 383 hypertension, low medication adherence and low COC are more likely to result in progress to  
8  
9 384 death in hospitalised patients (HR: 1.66 (95% CI:1.55-1.77) 1.14(95% CI: 1.08-1.20),  
10  
11 385 respectively). Low medication adherence and low COC are more likely to result in progress  
12  
13 386 to hospitalisation or death among outpatients (HR, 1.67(95% CI:1.47-1.90)). The differences  
14  
15 387 were because the incidence of hypertensive complications were not among their outcomes,  
16  
17 388 and the reason for hospitalisation varied, potentially causing the overestimation of the results.  
18  
19  
20

21 389 This study had several strengths. First, the study obtained population representativeness  
22  
23 390 because we utilised NHI data and NHI subscription is legally mandatory (covering  
24  
25 391 approximately 99.7%) in Korea. Second, the disease was selected from AHRQ standards of  
26  
27 392 ACSCs and hypertensive complications were selected according to the WHO. Third, there is a  
28  
29 393 standard in ACSCs related to hypertension (no cardiac procedures included), which is often  
30  
31 394 omitted in previous studies, and this is the first attempt at a long-term (18-year) analysis of  
32  
33 395 ambulatory care-sensitive conditions (hypertension) with a clearer definition of patients and  
34  
35 396 its incidence rate of complications. However, this study also had several limitations. First, as  
36  
37 397 only the continuity of treatment and medication adherence in the initial 2 years were  
38  
39 398 measured, follow-up after 2 years was not reflected in the effects of changes in care. Second,  
40  
41 399 the risk of complications or blood pressure level was not analysed in this study. Third,  
42  
43 400 whether other underlying diseases or external factors may affect the results, such as familial  
44  
45 401 aggregation, the levels of blood pressure, and over-prescription of drugs, of this study could  
46  
47 402 not be fully excluded. Fourth, due to the retrospective nature of this observational study,  
48  
49 403 misclassification or recall bias may impact the validity of this study. Finally, this study can be  
50  
51 404 elevated to mortality or factor study. The case-control or prospective cohort study to  
52  
53 405 elucidate the association between COC, MPR levels, and the mortality of patients with  
54  
55  
56  
57  
58  
59  
60

1  
2  
3 406 hypertensive complications with its characteristics.  
4

5 407 There are several policies for the management of ambulatory care-sensitive conditions  
6  
7 408 worldwide. For example, there are policies for diabetes, cervical cancer, and asthma in  
8  
9 409 Australia and policies for depression, cancer, and asthma in the UK and USA; it is possible to  
10  
11 410 provide primary care in a timely manner and manage chronic diseases more efficiently by  
12  
13 411 including more diseases subject to chronic disease management in the ambulatory care-  
14  
15 412 sensitive conditions (30). A follow-up study on the differences in the risk of complications  
16  
17 413 according to changes in care should be conducted in the future.  
18  
19  
20

21 414 This study sheds light on the association between COC and medication adherence and the  
22  
23 415 incidence of hypertensive complications such as coronary artery disease and heart disease.  
24  
25 416 The continuous management of blood pressure can be beneficial to prevent hypertensive  
26  
27 417 complications among the patients with hypertension. The implication should be based on  
28  
29 418 subgroup analysis, visiting medical institutes of primary care is adequately beneficial to  
30  
31 419 patients with hypertension. Therefore, the Korean government should establish health  
32  
33 420 policies related to chronic diseases that need management with a view to long-term care.  
34  
35 421 Moreover, because of its unique structure (lack of a gatekeeper system (referral system)), the  
36  
37 422 healthcare system of the Republic of Korea is facing a financial shortage. Future studies  
38  
39 423 should compare the cost-effectiveness of care provided by different types of medical  
40  
41 424 institutions, such as general hospitals and clinics.  
42  
43  
44  
45  
46  
47  
48

#### 49 426 **a. Contributorship statement**

50  
51 427 Conceptualisation: Dayea Kim, Methodology: Dayea Kim, Software: Dayea Kim, Data  
52  
53 428 curation: Dayea Kim, Writing – Original draft preparation: Jaewoo Cha, Visualisation: Jaewoo  
54  
55 429 Cha, Investigation: Dayea Kim, Jaewoo Cha, Supervision: Jaewoo Cha, Validation: Jaewoo  
56  
57 430 Cha, Writing – Reviewing and editing: Dayea Kim, Jaewoo Cha  
58  
59  
60

1  
2  
3 431  
45 432 **b. Competing interests**

6  
7  
8 433 The authors declare that the research was conducted in the absence of any commercial or  
9  
10 434 financial relationship that could be construed as potential conflicts of interest.

11  
12 435  
1314 436 **c. Funding**

15  
16  
17 437 This research received no specific grant from any funding agency in the public, commercial or  
18  
19 438 not-for-profit sectors.

20  
21 439  
2223 440 **d. Data sharing statement**

24  
25  
26 441 Raw data were generated by the National Health Insurance Service. Derived data supporting  
27  
28 442 the findings of this study are available from the corresponding author, Jaewoo Cha, on request.

29  
30 443  
3132 444 **e. Ethics statements**33 445 **Patient consent for publication**

34  
35  
36 446 Not applicable

37  
38 447  
3940 448 **f. Acknowledgements**

41  
42  
43 449 We thank Editage ([www.editage.co.kr](http://www.editage.co.kr)) for English language editing.

44  
45 450  
4647  
48 451  
4950  
51 452  
5253  
54 453  
5556  
57 454  
58

1  
2  
3 455 **REFERENCES**  
4

- 5  
6 456 1. World Health Organisation. Hypertension. [https://www.who.int/health-](https://www.who.int/health-topics/hypertension#tab=tab_1)  
7  
8 457 [topics/hypertension#tab=tab\\_1](https://www.who.int/health-topics/hypertension#tab=tab_1) (accessed 27 Nov 2022).  
9  
10 458 2. World Health Organisation. More than 700 million people with untreated hypertension.  
11  
12 459 [https://www.who.int/news/item/25-08-2021-more-than-700-million-people-with-untreated-](https://www.who.int/news/item/25-08-2021-more-than-700-million-people-with-untreated-hypertension)  
13  
14 460 [hypertension](https://www.who.int/news/item/25-08-2021-more-than-700-million-people-with-untreated-hypertension) (accessed 27 Nov 2022).  
15  
16 461 3. Forouzanfar MH, Liu P, Roth GA, *et al*. Global burden of hypertension and systolic blood  
17  
18 462 pressure of at least 110 to 115 mm Hg, 1990–2015. *JAMA* 2017;317:165–82.  
19  
20 463 4. Liu J, Bu X, Wei L, *et al*. Global burden of cardiovascular diseases attributable to  
21  
22 464 hypertension in young adults from 1990 to 2019. *J Hypertens* 2021;39: 2488–96.  
23  
24 465 5. Ansari Z. The Concept and usefulness of ambulatory care sensitive conditions as indicators  
25  
26 466 of quality and access to primary health care. *Aust J Prim Health*. 2007;13:91.  
27  
28 467 6. Lin W, Huang I, Wang S, Yang M, Yaung C. Continuity of diabetes care is associated with  
29  
30 468 avoidable hospitalizations: evidence from Taiwan's National Health Insurance scheme. *Int J*  
31  
32 469 *Qual Health Care*. 2009;22:3–8.  
33  
34 470 7. Billings J, Zeitel L, Lukomnik J, Carey T, Blank A, Newman L. Impact Of socioeconomic  
35  
36 471 status on hospital use In New York City. *Health Aff (Millwood)*. 1993;12:162–73.  
37  
38 472 8. Gao J, Moran E, Li Y, Almenoff P. Predicting potentially avoidable hospitalizations. *Med*  
39  
40 473 *Care*. 2014;52:164–71.  
41  
42 474 9. Laditka J, Laditka S, Mastanduno M. Hospital utilization for ambulatory care sensitive  
43  
44 475 conditions: health outcome disparities associated with race and ethnicity. *Soc Sci Med*.  
45  
46 476 2003;57:1429–41. [https://doi.org/10.1016/s0277-9536\(02\)00539-7](https://doi.org/10.1016/s0277-9536(02)00539-7)  
47  
48 477 10. Shin S, Song H, Oh SK, Choi KE, Kim H, Jang S. Effect of antihypertension medication  
49  
50 478 adherence on hospitalization for cardiovascular disease and mortality in hypertension  
51  
52 479 patients. *Hypertens Res*. 2013;36:1000–5.  
53  
54  
55  
56  
57  
58  
59  
60

- 1  
2  
3 480 11. Nam Y, Cho K, Kang H, Lee K, Park E. Greater continuity of care reduces hospital  
4  
5 481 admissions in patients with hypertension: an analysis of nationwide health insurance data in  
6  
7 482 Korea, 2011–2013. *Health Policy*. 2016;120:604–11.
- 8  
9  
10 483 12. Gygli N, Zúñiga F, Simon M. Regional variation of potentially avoidable hospitalisation  
11  
12 484 in Switzerland: an observational study. *BMC Health Serv Res*. 2021;21:849.
- 13  
14 485 13. National Health Insurance Service. National Health Insurance Data Sharing Service.  
15  
16 486 <https://nhiss.nhis.or.kr/bd/ab/bdaba012eng.do> (accessed 27 Nov 2022).
- 17  
18 487 14. Cheng S, Chen C, Hou Y. A longitudinal examination of continuity of care and avoidable  
19  
20 488 hospitalization. *Arch Intern Med*. 2010;170:1671–77.
- 21  
22 489 15. Christakis DA, Wright JA, Koepsell TD, Emerson S, Connell FA. Is greater continuity of  
23  
24 490 care associated with less emergency department utilization? *Pediatrics*. 1999;103:738–42.
- 25  
26 491 16. Statistics Korea. Statistics Korea – Cause of death.  
27  
28 492 <https://kostat.go.kr/portal/eng/index.action> (accessed 2 Dec 2022).
- 29  
30 493 17. KOSIS. KOSIS: Life table. KOSIS.  
31  
32 494 [https://kosis.kr/statHtml/statHtml.do?orgId=101&tblId=DT\\_1B42&conn\\_path=I2](https://kosis.kr/statHtml/statHtml.do?orgId=101&tblId=DT_1B42&conn_path=I2). Published  
33  
34 495 December 6, 2022. Accessed April 25, 2023.
- 35  
36 496 18. Citro R, Ghosh S, Churgin PG. A fundamental metric for continuity of care: modeling  
37  
38 497 and performance evaluation. *IEEE Trans Inf Technol Biomed*. 1997;1:189–204.
- 39  
40 498 19. Tom J, Tseng C, Davis J, Solomon C, Zhou C, Mangione-Smith R. Missed well-child  
41  
42 499 care visits, low continuity of care, and risk of ambulatory care-sensitive hospitalizations in  
43  
44 500 young children. *Arch Pediatr Adolesc Med*. 2010;164:1052–8.
- 45  
46 501 20. Hong JS, Kim JY, Kang HC. Continuity of ambulatory care among adult patients for type  
47  
48 502 2 diabetes and its associated factors in Korea. *Korean J Health Policy and Adm*. 2009;19:51–  
49  
50 503 70.
- 51  
52 504 21. Shortell SM. Continuity of medical care: conceptualization and measurement. *Med Care*.  
53  
54 505 1976;14:377–91.

- 1  
2  
3 506 22. Bice TW, Boxerman SB. A quantitative measure of continuity of care. *Med Care*.  
4  
5 507 1977;15:347–9.  
6  
7  
8 508 23. Christakis DA, Wright JA, Koepsell TD, Emerson S, Connell FA. Is greater continuity of  
9  
10 509 care associated with less emergency department utilization? *Pediatrics*. 1999;103:738–42.  
11  
12 510 24. Kalsekar I, Iyer S, Mody R, Rajagopalan R, Kavookjian J. Utilization and costs for  
13  
14 511 compliant patients initiating therapy with pioglitazone or rosiglitazone versus insulin in a  
15  
16 512 Medicaid fee-for-service population. *J Manage Care Pharm*. 2006;12:121–9.  
17  
18  
19 513 25. Statistics Office, Korea. The number of outpatient visit in Korea.  
20  
21 514 <https://www.index.go.kr/unify/idx-info.do?idxCd=4240> (accessed 10 Apr 2023).  
22  
23  
24 515 26. Pittman DG, Chen W, Bowlin SJ, Foody JAM. Adherence to statins, subsequent  
25  
26 516 healthcare costs, and cardiovascular hospitalizations. *Am J Cardiol*. 2011;107:1662–6.  
27  
28 517 27. Han E, Suh DC, Lee SM, Jang S. The impact of medication adherence on health  
29  
30 518 outcomes for chronic metabolic diseases: A retrospective cohort study. *Res Social Adm*  
31  
32 519 *Pharm*. 2014;10:e87–98.  
33  
34  
35 520 28. Charlson ME, Charlson RE, Peterson JC, Marinopoulos SS, Briggs WM, Hollenberg JP.  
36  
37 521 The Charlson Comorbidity Index is adapted to predict costs of chronic disease in primary  
38  
39 522 care patients. *J Clin Epidemiol*. 2008;61:1234–40.  
40  
41  
42  
43 523 29. Shin S, Song H, Oh S-K, Choi KE, Kim H, Jang S. Effect of antihypertensive medication  
44  
45 524 adherence on hospitalization for cardiovascular disease and mortality in hypertensive  
46  
47 525 patients. *Hypertension Research*. 2013;36(11):1000-1005. doi:10.1038/hr.2013.85  
48  
49  
50  
51  
52 526 30. Santos R, Rice N, Gravelle H. Patterns of emergency admissions for ambulatory care  
53  
54 527 sensitive conditions: A spatial cross-sectional analysis of observational data. *BMJ Open*.  
55  
56 528 2020;10(11). doi:10.1136/bmjopen-2020-039910  
57  
58  
59  
60

**Figure 1.** Flow diagram of the study population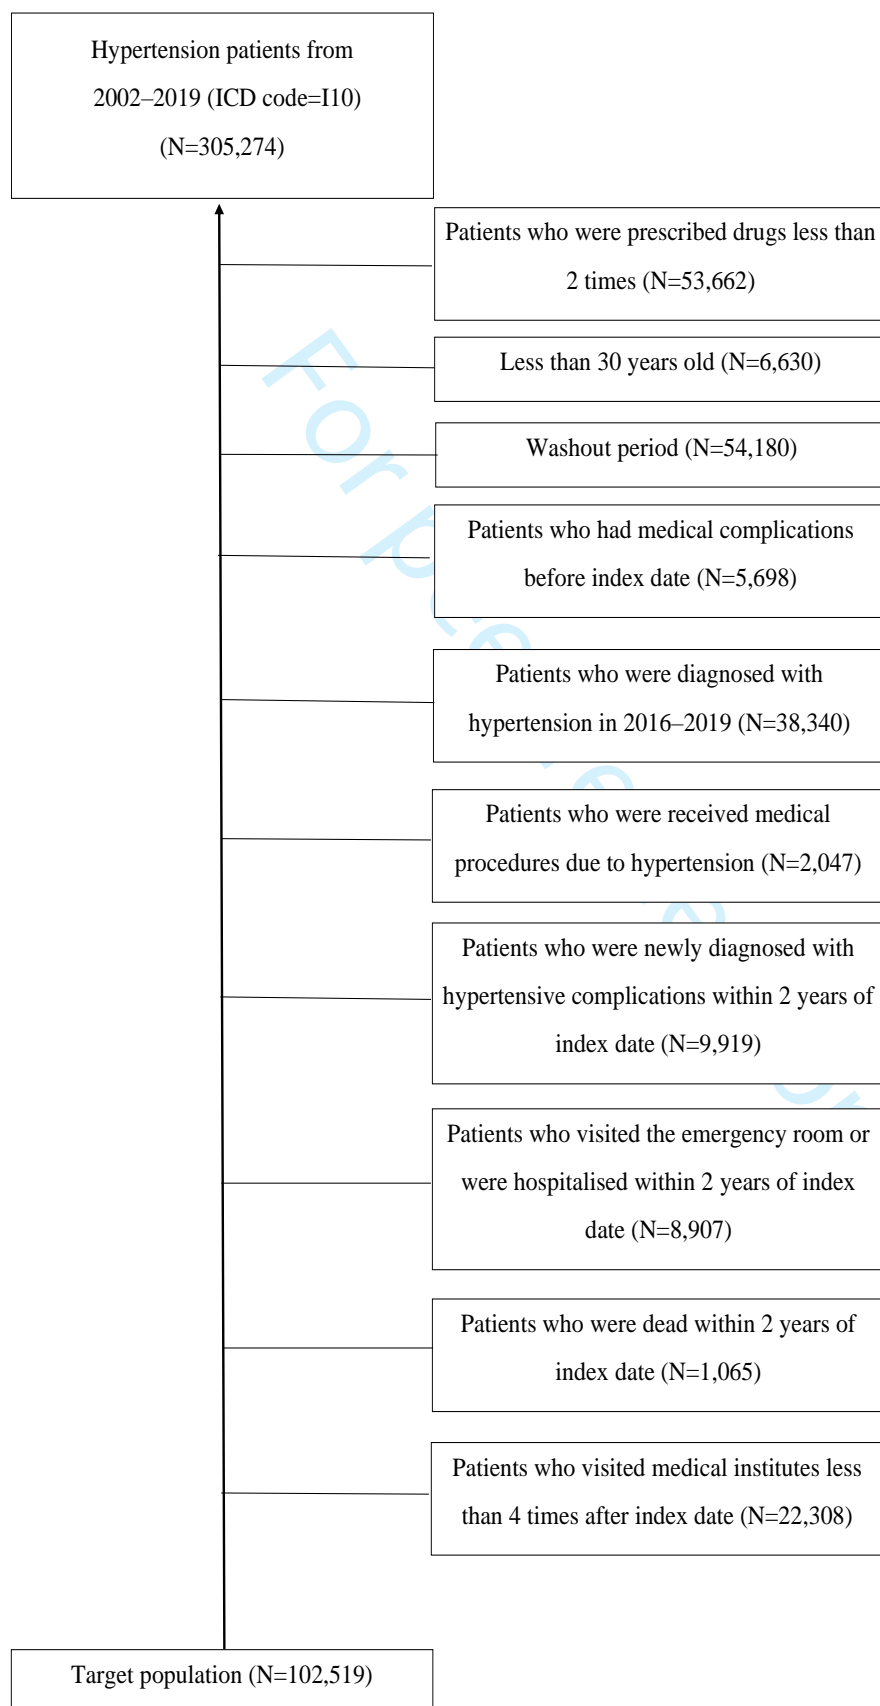



## Supplementary Materials

**Supplementary Table 1.** Antihypertensive drugs included.

| Drugs included                                                                                                                                                                                                                                                                                                                                                                                                                                              |
|-------------------------------------------------------------------------------------------------------------------------------------------------------------------------------------------------------------------------------------------------------------------------------------------------------------------------------------------------------------------------------------------------------------------------------------------------------------|
| Captopril, enalapril, ramipril, candesartan, fimasartan, losartan, olmesartan, telmisartan, valsartan, carteolol, nadolol, propranolol, nifedipine, felodipine, amlodipine, lercanidipine, CCB, diltiazem, verapamil, atenolol, bisoprolol, celiprolol, metoprolol, amosulalol, carvedilol, bevantolol, doxazosin, terazosin, hydrochlorothiazide, indapamide, furosemide, torsemide, spironolactone, amiloride, hydralazine, minoxidil, and nitroprusside. |

**Supplementary Table 2. General Characteristics of the Study population**

| Variable            |                                        | N       | %     |
|---------------------|----------------------------------------|---------|-------|
| Total               |                                        | 102,519 | 100.0 |
| Sex                 | Male                                   | 51,522  | 50.3  |
|                     | Female                                 | 50,997  | 49.7  |
| Age                 | 30–39                                  | 2,084   | 2.0   |
|                     | 40–49                                  | 16,943  | 16.5  |
|                     | 50–59                                  | 15,266  | 14.9  |
|                     | 60–69                                  | 18,532  | 18.1  |
|                     | 70–79                                  | 22,056  | 21.5  |
|                     | Over 80                                | 27,638  | 27.0  |
| Insurance type      | National Health Insurance              | 96,325  | 94.0  |
|                     | Others                                 | 6,194   | 6.0   |
| Income              | 0 decile (0USD)                        | 284     | 2.0   |
|                     | 1st and 2nd deciles (857-1,781USD)     | 16,943  | 16.5  |
|                     | 3rd and 4th deciles (2,609-3,273USD)   | 15,266  | 14.9  |
|                     | 5th and 6th deciles (3,963-4,620USD)   | 18,532  | 18.1  |
|                     | 7th and 8th deciles (5,357-6,323USD)   | 22,056  | 21.5  |
|                     | 9th and 10th deciles (7,925-11,288USD) | 27,638  | 27.0  |
| Number of visits    | 4–6                                    | 16,175  | 15.8  |
|                     | 7–9                                    | 30,475  | 29.7  |
|                     | 10–12                                  | 30,236  | 29.5  |
|                     | ≥13                                    | 25,633  | 25.0  |
| Number of providers | 1                                      | 52,197  | 50.9  |
|                     | 2                                      | 31,825  | 31.0  |
|                     | 3                                      | 12,462  | 12.2  |
|                     | ≥4                                     | 6,053   | 5.9   |

| Variable           |                           | N      | %    |
|--------------------|---------------------------|--------|------|
| Level of hospital  | Tertiary general hospital | 4,857  | 4.7  |
|                    | General hospital          | 9,292  | 9.1  |
|                    | Hospital                  | 6,270  | 6.1  |
|                    | Clinic                    | 72,612 | 70.8 |
|                    | Others                    | 9,488  | 9.3  |
| CCI: Diabetes      | Yes                       | 29,391 | 28.7 |
|                    | No                        | 73,128 | 71.3 |
| CCI: Dyslipidaemia | Yes                       | 51,048 | 49.8 |
|                    | No                        | 51,471 | 50.2 |
| COC                | High (COC index =1)       | 52,179 | 50.9 |
|                    | Low (COC index < 1)       | 50,340 | 49.1 |
| MPR                | Excellent (80–100%)       | 56,939 | 55.5 |
|                    | Good (60–79%)             | 16,012 | 15.6 |
|                    | Normal (40–59%)           | 11,808 | 11.5 |
|                    | Bad (20–39%)              | 9,996  | 9.8  |
|                    | Very bad (0–19%)          | 7,764  | 7.6  |
| Year of diagnosis  | 2004                      | 10,357 | 10.1 |
|                    | 2005                      | 12,362 | 12.1 |
|                    | 2006                      | 10,321 | 10.1 |
|                    | 2007                      | 9,017  | 8.8  |
|                    | 2008                      | 9,101  | 8.9  |
|                    | 2009                      | 8,906  | 8.7  |
|                    | 2010                      | 8,082  | 7.9  |
|                    | 2011                      | 7,807  | 7.6  |
|                    | 2012                      | 7,623  | 7.4  |
|                    | 2013                      | 6,699  | 6.5  |
|                    | 2014                      | 5,772  | 5.6  |
|                    | 2015                      | 6,472  | 6.3  |

COC, continuity of care; MPR, medication possession ratio

**Supplementary Table 3.** Subgroup analysis of the hazard ratio of medical complications according to COC and MPR levels in clinics (primary care)

|                  | Hazard Ratio |            |                |                            |                 |
|------------------|--------------|------------|----------------|----------------------------|-----------------|
|                  | Patients     | Events (N) | IR per 1000PYR | HR (95% CI)                | <i>p-value</i>  |
| COC level        |              |            |                |                            |                 |
| High             | 36,273       | 4,437      | 13.8           | Ref                        |                 |
| Low              | 36,339       | 5,405      | 16.2           | <b>1.16 (1.12–1.21)***</b> | <b>&lt;.001</b> |
| MPR Level        |              |            |                |                            |                 |
| Excellent        | 41,414       | 4,674      | 12.8           | Ref                        |                 |
| Good             | 11,326       | 1,738      | 16.1           | <b>1.21 (1.15–1.28)***</b> | <b>&lt;.001</b> |
| Normal           | 7,953        | 1,362      | 18.1           | <b>1.37 (1.29–1.45)***</b> | <b>&lt;.001</b> |
| Bad              | 6,518        | 1,118      | 18.7           | <b>1.43 (1.34–1.52)***</b> | <b>&lt;.001</b> |
| Very bad         | 5,401        | 950        | 19.6           | <b>1.51 (1.40–1.61)***</b> | <b>&lt;.001</b> |
| Number of visits |              |            |                |                            |                 |
| 4–6 times        | 8,770        | 1,388      | 17.8           | Ref                        |                 |
| 7–9 times        | 18,484       | 2,490      | 15.1           | <b>0.86 (0.80–0.91)***</b> | <b>&lt;.001</b> |
| 10–12 times      | 23,493       | 3,112      | 14.1           | <b>0.78 (0.73–0.83)***</b> | <b>&lt;.001</b> |
| Over 13 times    | 21,865       | 2,852      | 14.9           | <b>0.85 (0.80–0.91)***</b> | <b>&lt;.001</b> |

N, Number; COC, continuity of care; MPR, Medication Possession Ratio; HR, hazards ratio; CI, confidence interval; IR,

Incidence rate; PYR, Person Years at Risk

\*\*\*Significance at  $p < .001$ .

**Supplementary Figure 1.** Kaplan–Meier Curve of medical complications according to Continuity of Care (COC) level

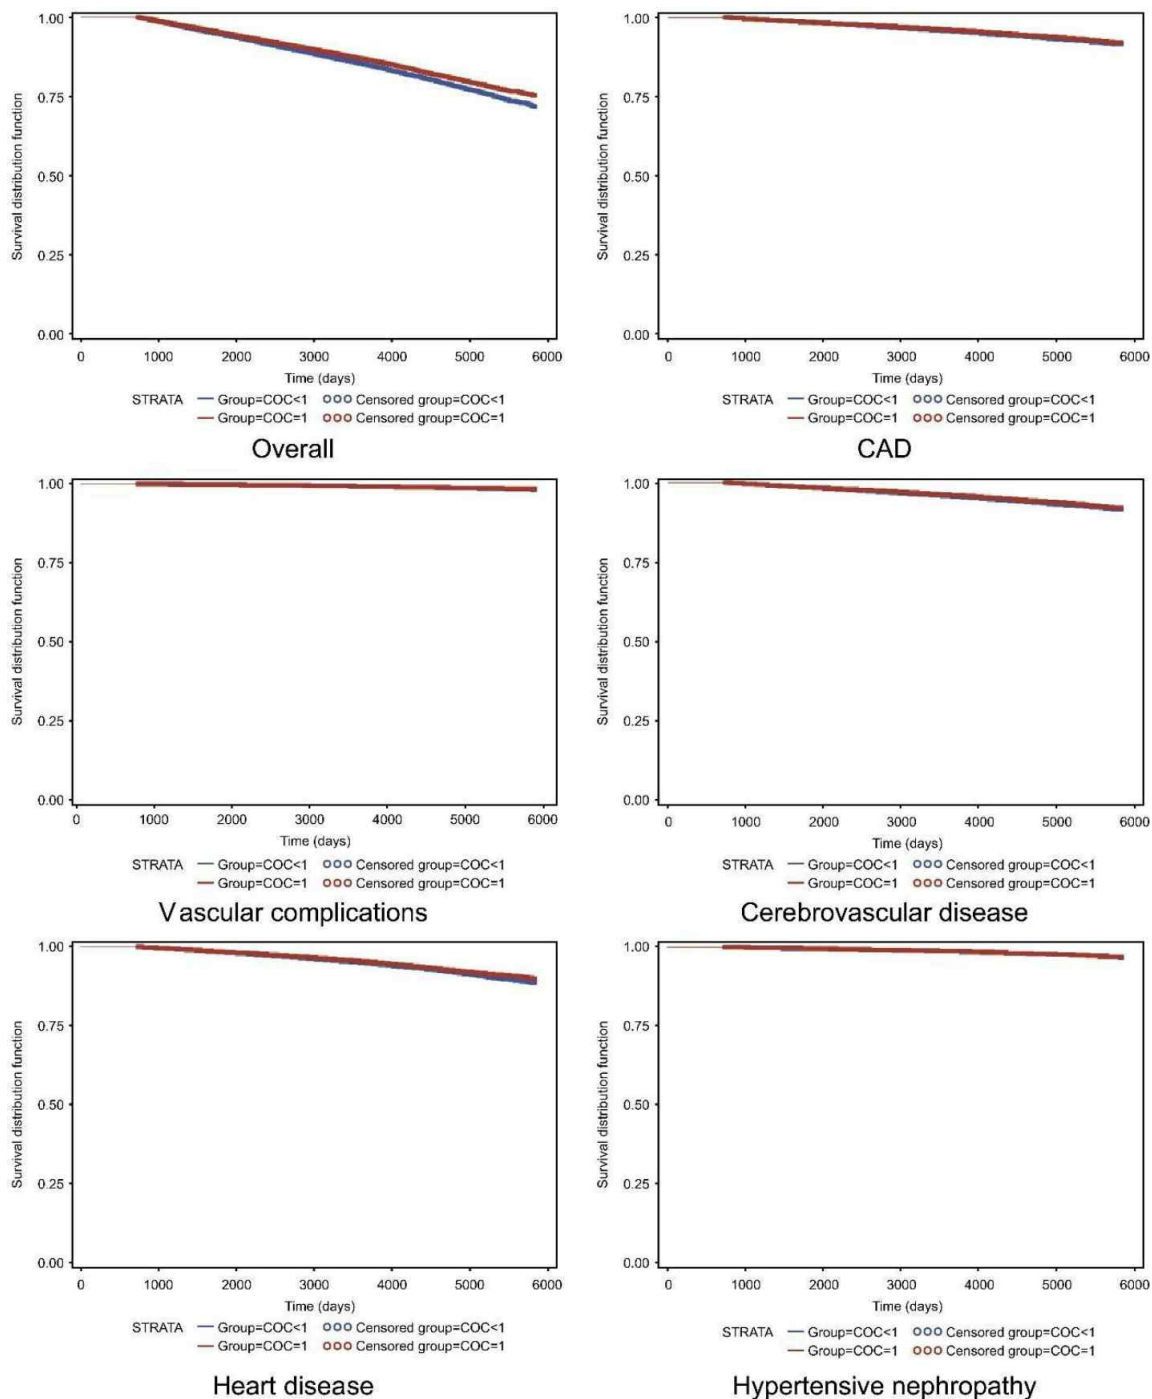

**Supplementary Figure 2.** Kaplan–Meier Curve of medical complications according to medicine possession ratio (MPR) level

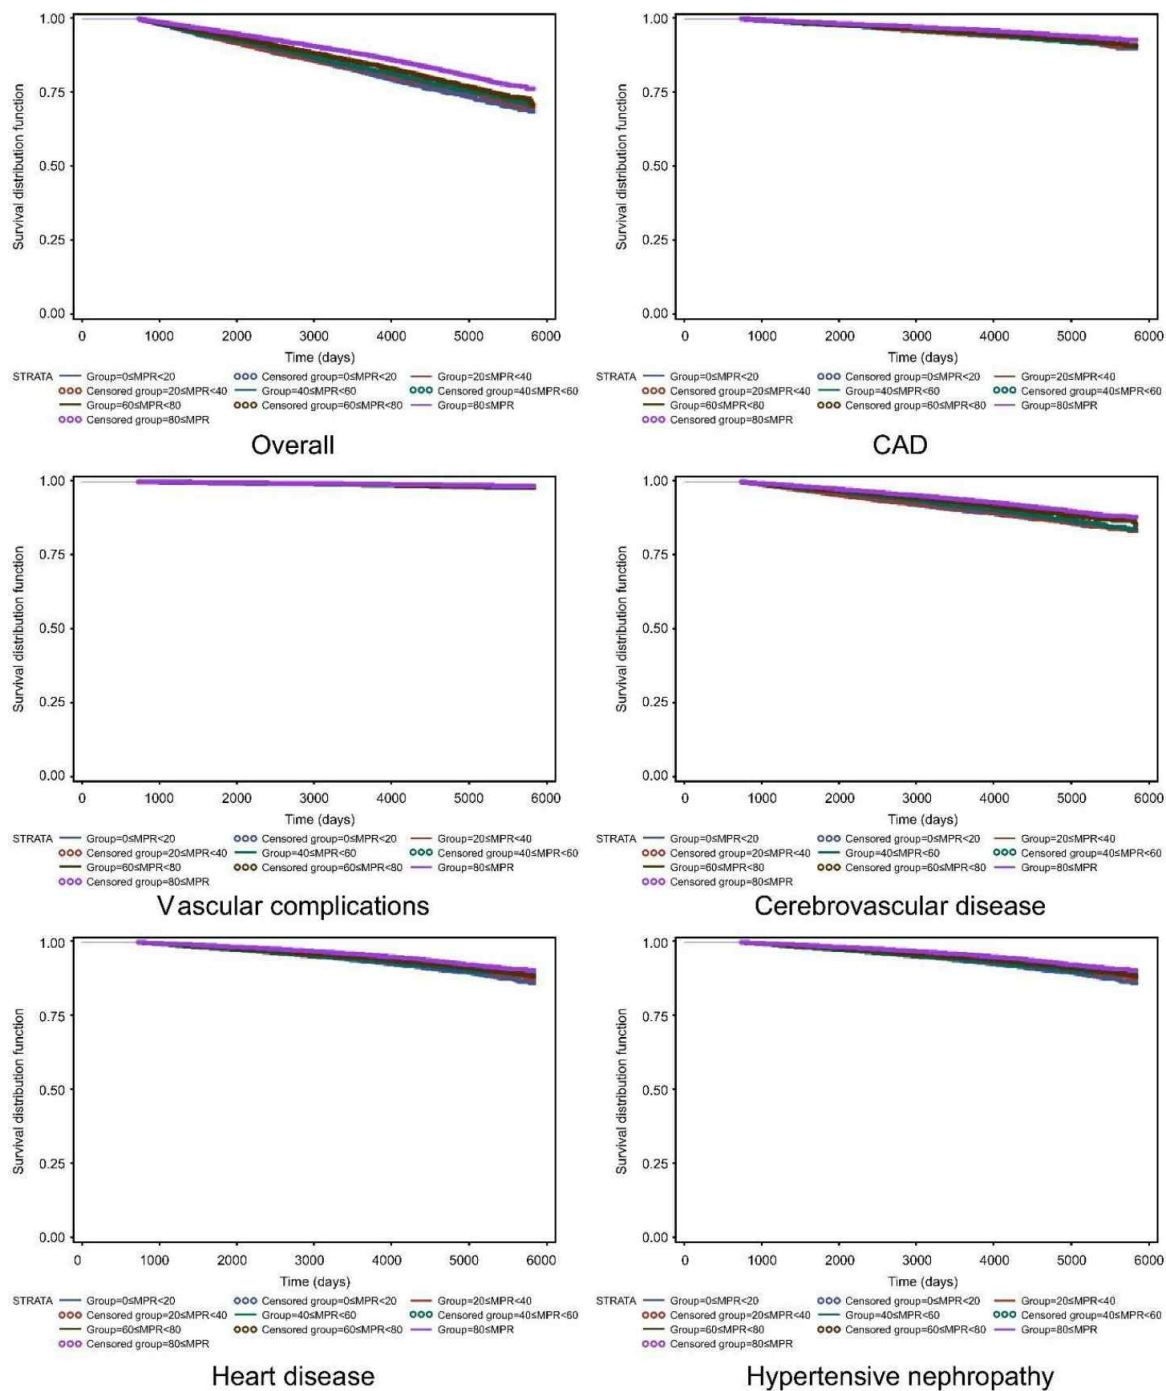

1  
2  
3  
4  
5  
6  
7  
8  
9  
10  
11  
12  
13  
14  
15  
16  
17  
18  
19  
20  
21  
22  
23  
24  
25  
26  
27  
28  
29  
30  
31  
32  
33  
34  
35  
36  
37  
38  
39  
40  
41  
42  
43  
44  
45  
46  
47  
48  
49  
50  
51  
52  
53  
54  
55  
56  
57  
58  
59  
60

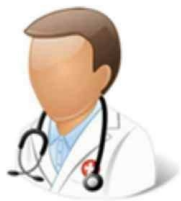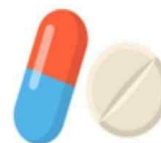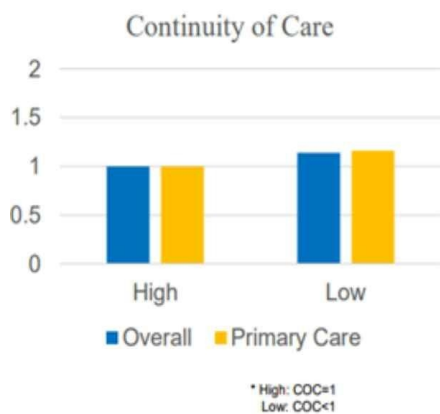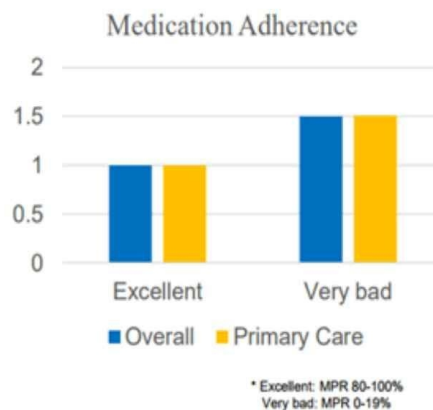

294x227mm (120 x 120 DPI)

## STROBE Statement—checklist of items that should be included in reports of observational studies

|                           | Item No | Recommendation                                                                                                                                                                                                                                                                                                                                                                                                                                                         | Page No |
|---------------------------|---------|------------------------------------------------------------------------------------------------------------------------------------------------------------------------------------------------------------------------------------------------------------------------------------------------------------------------------------------------------------------------------------------------------------------------------------------------------------------------|---------|
| <b>Title and abstract</b> | 1       | (a) Indicate the study's design with a commonly used term in the title or the abstract                                                                                                                                                                                                                                                                                                                                                                                 | 1       |
|                           |         | (b) Provide in the abstract an informative and balanced summary of what was done and what was found                                                                                                                                                                                                                                                                                                                                                                    | 3       |
| <b>Introduction</b>       |         |                                                                                                                                                                                                                                                                                                                                                                                                                                                                        |         |
| Background/rationale      | 2       | Explain the scientific background and rationale for the investigation being reported                                                                                                                                                                                                                                                                                                                                                                                   | 5       |
| Objectives                | 3       | State specific objectives, including any prespecified hypotheses                                                                                                                                                                                                                                                                                                                                                                                                       | 6       |
| <b>Methods</b>            |         |                                                                                                                                                                                                                                                                                                                                                                                                                                                                        |         |
| Study design              | 4       | Present key elements of study design early in the paper                                                                                                                                                                                                                                                                                                                                                                                                                | 6       |
| Setting                   | 5       | Describe the setting, locations, and relevant dates, including periods of recruitment, exposure, follow-up, and data collection                                                                                                                                                                                                                                                                                                                                        | 7-12    |
| Participants              | 6       | (a) <i>Cohort study</i> —Give the eligibility criteria, and the sources and methods of selection of participants. Describe methods of follow-up<br><i>Case-control study</i> —Give the eligibility criteria, and the sources and methods of case ascertainment and control selection. Give the rationale for the choice of cases and controls<br><i>Cross-sectional study</i> —Give the eligibility criteria, and the sources and methods of selection of participants | 6       |
|                           |         | (b) <i>Cohort study</i> —For matched studies, give matching criteria and number of exposed and unexposed<br><i>Case-control study</i> —For matched studies, give matching criteria and the number of controls per case                                                                                                                                                                                                                                                 | N/A     |
| Variables                 | 7       | Clearly define all outcomes, exposures, predictors, potential confounders, and effect modifiers. Give diagnostic criteria, if applicable                                                                                                                                                                                                                                                                                                                               | 10-11   |
| Data sources/measurement  | 8*      | For each variable of interest, give sources of data and details of methods of assessment (measurement). Describe comparability of assessment methods if there is more than one group                                                                                                                                                                                                                                                                                   | 6-7     |
| Bias                      | 9       | Describe any efforts to address potential sources of bias                                                                                                                                                                                                                                                                                                                                                                                                              | 7       |
| Study size                | 10      | Explain how the study size was arrived at                                                                                                                                                                                                                                                                                                                                                                                                                              | 7       |
| Quantitative variables    | 11      | Explain how quantitative variables were handled in the analyses. If applicable, describe which groupings were chosen and why                                                                                                                                                                                                                                                                                                                                           | 6-8     |
| Statistical methods       | 12      | (a) Describe all statistical methods, including those used to control for confounding                                                                                                                                                                                                                                                                                                                                                                                  | 10-11   |
|                           |         | (b) Describe any methods used to examine subgroups and interactions                                                                                                                                                                                                                                                                                                                                                                                                    | 10      |
|                           |         | (c) Explain how missing data were addressed                                                                                                                                                                                                                                                                                                                                                                                                                            | 7       |
|                           |         | (d) <i>Cohort study</i> —If applicable, explain how loss to follow-up was addressed<br><i>Case-control study</i> —If applicable, explain how matching of cases and controls was addressed<br><i>Cross-sectional study</i> —If applicable, describe analytical methods taking account of sampling strategy                                                                                                                                                              | 7       |
|                           |         | (e) Describe any sensitivity analyses                                                                                                                                                                                                                                                                                                                                                                                                                                  | N/A     |

Continued on next page



| <b>Results</b>           |     |                                                                                                                                                                                                              |          |
|--------------------------|-----|--------------------------------------------------------------------------------------------------------------------------------------------------------------------------------------------------------------|----------|
| Participants             | 13* | (a) Report numbers of individuals at each stage of study—eg numbers potentially eligible, examined for eligibility, confirmed eligible, included in the study, completing follow-up, and analysed            | 7        |
|                          |     | (b) Give reasons for non-participation at each stage                                                                                                                                                         | 7        |
|                          |     | (c) Consider use of a flow diagram                                                                                                                                                                           | Figure 1 |
| Descriptive data         | 14* | (a) Give characteristics of study participants (eg demographic, clinical, social) and information on exposures and potential confounders                                                                     | 12-14    |
|                          |     | (b) Indicate number of participants with missing data for each variable of interest                                                                                                                          | N/A      |
|                          |     | (c) <i>Cohort study</i> —Summarise follow-up time (eg, average and total amount)                                                                                                                             | 7        |
| Outcome data             | 15* | <i>Cohort study</i> —Report numbers of outcome events or summary measures over time                                                                                                                          | 12-19    |
|                          |     | <i>Case-control study</i> —Report numbers in each exposure category, or summary measures of exposure                                                                                                         |          |
|                          |     | <i>Cross-sectional study</i> —Report numbers of outcome events or summary measures                                                                                                                           |          |
| Main results             | 16  | (a) Give unadjusted estimates and, if applicable, confounder-adjusted estimates and their precision (eg, 95% confidence interval). Make clear which confounders were adjusted for and why they were included | 12-19    |
|                          |     | (b) Report category boundaries when continuous variables were categorized                                                                                                                                    | 12-19    |
|                          |     | (c) If relevant, consider translating estimates of relative risk into absolute risk for a meaningful time period                                                                                             | 12-19    |
| Other analyses           | 17  | Report other analyses done—eg analyses of subgroups and interactions, and sensitivity analyses                                                                                                               | 18-19    |
| <b>Discussion</b>        |     |                                                                                                                                                                                                              |          |
| Key results              | 18  | Summarise key results with reference to study objectives                                                                                                                                                     | 19-21    |
| Limitations              | 19  | Discuss limitations of the study, taking into account sources of potential bias or imprecision. Discuss both direction and magnitude of any potential bias                                                   | 20-21    |
| Interpretation           | 20  | Give a cautious overall interpretation of results considering objectives, limitations, multiplicity of analyses, results from similar studies, and other relevant evidence                                   | 19-21    |
| Generalisability         | 21  | Discuss the generalisability (external validity) of the study results                                                                                                                                        | 19-21    |
| <b>Other information</b> |     |                                                                                                                                                                                                              |          |
| Funding                  | 22  | Give the source of funding and the role of the funders for the present study and, if applicable, for the original study on which the present article is based                                                | 22       |

\*Give information separately for cases and controls in case-control studies and, if applicable, for exposed and unexposed groups in cohort and cross-sectional studies.

**Note:** An Explanation and Elaboration article discusses each checklist item and gives methodological background and published examples of transparent reporting. The STROBE checklist is best used in conjunction with this article (freely available on the Web sites of PLoS Medicine at <http://www.plosmedicine.org/>, Annals of Internal Medicine at <http://www.annals.org/>, and Epidemiology at <http://www.epidem.com/>). Information on the STROBE Initiative is available at [www.strobe-statement.org](http://www.strobe-statement.org).

# BMJ Open

## The association between medical complications according to continuity of care and medication adherence in patients with hypertension in Korea: a national population-based cohort study

|                                 |                                                                                                                                                                                 |
|---------------------------------|---------------------------------------------------------------------------------------------------------------------------------------------------------------------------------|
| Journal:                        | <i>BMJ Open</i>                                                                                                                                                                 |
| Manuscript ID                   | bmjopen-2023-073404.R2                                                                                                                                                          |
| Article Type:                   | Original research                                                                                                                                                               |
| Date Submitted by the Author:   | 05-Jun-2023                                                                                                                                                                     |
| Complete List of Authors:       | Kim, Dayea; Korea University, Graduate School of Public Health<br>CHA, Jaewoo; Korea University, Preventive Medicine                                                            |
| <b>Primary Subject Heading</b>: | Cardiovascular medicine                                                                                                                                                         |
| Secondary Subject Heading:      | Health services research, Health policy, Medical management, Public health, Pharmacology and therapeutics                                                                       |
| Keywords:                       | Hypertension < CARDIOLOGY, Cardiology < INTERNAL MEDICINE, Primary Health Care, PREVENTIVE MEDICINE, Health policy < HEALTH SERVICES ADMINISTRATION & MANAGEMENT, PUBLIC HEALTH |
|                                 |                                                                                                                                                                                 |

SCHOLARONE™  
Manuscripts



I, the Submitting Author has the right to grant and does grant on behalf of all authors of the Work (as defined in the below author licence), an exclusive licence and/or a non-exclusive licence for contributions from authors who are: i) UK Crown employees; ii) where BMJ has agreed a CC-BY licence shall apply, and/or iii) in accordance with the terms applicable for US Federal Government officers or employees acting as part of their official duties; on a worldwide, perpetual, irrevocable, royalty-free basis to BMJ Publishing Group Ltd ("BMJ") its licensees and where the relevant Journal is co-owned by BMJ to the co-owners of the Journal, to publish the Work in this journal and any other BMJ products and to exploit all rights, as set out in our [licence](#).

The Submitting Author accepts and understands that any supply made under these terms is made by BMJ to the Submitting Author unless you are acting as an employee on behalf of your employer or a postgraduate student of an affiliated institution which is paying any applicable article publishing charge ("APC") for Open Access articles. Where the Submitting Author wishes to make the Work available on an Open Access basis (and intends to pay the relevant APC), the terms of reuse of such Open Access shall be governed by a Creative Commons licence – details of these licences and which [Creative Commons](#) licence will apply to this Work are set out in our licence referred to above.

Other than as permitted in any relevant BMJ Author's Self Archiving Policies, I confirm this Work has not been accepted for publication elsewhere, is not being considered for publication elsewhere and does not duplicate material already published. I confirm all authors consent to publication of this Work and authorise the granting of this licence.

1  
2  
3 1 **The association between medical complications according to continuity of care and**  
4  
5 2 **medication adherence in patients with hypertension in Korea: A national population-**  
6  
7 3 **based cohort study**  
8  
9

10 4  
11  
12 5 Dayea Kim,<sup>1</sup> MPH, Jaewoo Cha,<sup>2\*</sup> MPH

13 6 Dayea Kim: 0000-0003-0443-9291

14 7 Jaewoo Cha: 0000-0002-7966-1551

15 8  
16  
17 9 <sup>1</sup> Graduate School of Public Health, Korea University College of Medicine, Seoul, Republic  
18  
19  
20  
21  
22 10 of Korea

23  
24 11 <sup>2</sup> Department of Preventive Medicine, Korea University College of Medicine, Seoul,  
25  
26  
27 12 Republic of Korea  
28  
29

30  
31  
32  
33 14 **\*Correspondence to:** Jaewoo Cha, MPH

34  
35 15 Department of Preventive Medicine, Korea University College of Medicine

36 16 Seoul, 02841, Republic of Korea

37 17 Phone: +82 10-5766-7651

38 18 Fax: +82 2-927-7220

39 19 E-mail: [cha7651@naver.com](mailto:cha7651@naver.com)  
40  
41  
42  
43  
44  
45  
46  
47  
48  
49  
50

51 22 The corresponding author attests that all listed authors meet authorship criteria and that no  
52  
53 23 others meeting the criteria have been omitted.  
54  
55  
56  
57  
58  
59  
60

1  
2  
3 26 **ABSTRACT**  
4

5 27 **Objectives:** To analyse the differences in hypertensive complications according to continuity  
6  
7  
8 28 of care and medication adherence in patients with hypertension.

9  
10 29 **Design:** A national population-based retrospective cohort study.

11  
12 30 **Setting:** Secondary data analysis using National insurance claims data at all levels of hospitals  
13  
14  
15 31 in South Korea.

16  
17 32 **Participants:** A total of 102,519 patients diagnosed with hypertension were included in this  
18  
19 33 study.

20  
21 34 **Primary outcome measures:** The levels of continuity of care and medication adherence were  
22  
23 35 estimated within the initial 2 years of the follow-up period, and the incidence of medical  
24  
25 36 complications was estimated within the subsequent 16 years. We utilised the level of continuity  
26  
27 37 of care (COC) to measure continuity of care and the medication possession ratio (MPR) to  
28  
29 38 measure medication adherence.

30  
31  
32  
33 39 **Results:** The average level of COC in the hypertension group was 0.8112. The average  
34  
35 40 proportion of the MPR in the hypertension group was 73.3%. Continuity of care in patients  
36  
37 41 with hypertension showed varying results: the low COC group had a 1.14-fold increased risk  
38  
39 42 of medical complications compared to the high COC group. In terms of the level of MPR in  
40  
41 43 patients with hypertension, the 0–19% MPR group had a 1.5-fold risk of medical  
42  
43 44 complications relative to the 80–100% MPR group.

44  
45  
46 47 **Conclusions:** In patients with hypertension, high continuity of care and medication adherence  
47  
48 48 for the first 2 years of diagnosis can help prevent medical complications and promote  
49  
50 49 patients' health. Therefore, effective strategies to improve continuity of care and medication  
51  
52 50 adherence are required. Future research should include some factors that may affect the  
53  
54 51 incidence of hypertensive complications, such as familial aggregation, and hazard  
55  
56 52 stratification by the level of blood pressure, which were not considered in this study.  
57  
58  
59  
60

1  
2  
3 51 Therefore, there may be residual confounding and still room for improvement.  
4

5 52 **Keywords:** ambulatory care-sensitive conditions, continuity of care, hypertension,  
6  
7 medication adherence, retrospective cohort  
8  
9

10 54

11  
12 55 **Strengths and limitations of this study**  
13

- 14  
15 56 • The study had a long follow-up period (18 years) and included over 100,000 participants,  
16  
17 57 which are regarded as indicators of relatively higher reliability and validity in cohort  
18  
19 58 studies according to the European Society of Cardiology.  
20  
21 59 • The utilised database contained data on health service use of over 50,000,000 Korean  
22  
23 60 citizens' (99.7% of whole population), indicating that it was nationally representative.  
24  
25 61 • Hypertension (International Classification of Disease-11 code: I.10) was selected from  
26  
27 62 the Ambulatory Care-Sensitive Conditions list in the Agency of Health Research and  
28  
29 63 Quality standard and hypertensive complications were selected according to the  
30  
31 64 definitions from World Health Organization and the advice from specialists in internal  
32  
33 65 medicine.  
34  
35 66 • Owing to the retrospective nature of the study, the possibility of bias, including  
36  
37 67 misclassification bias, may not be excluded.  
38  
39 68 • Some factors that may affect the incidence of hypertensive complications, such as  
40  
41 69 familial aggregation, and hazard stratification by the level of blood pressure were not  
42  
43 70 considered.  
44  
45  
46  
47  
48  
49  
50  
51  
52  
53  
54  
55  
56  
57  
58  
59  
60

76

77

## 78 INTRODUCTION

79 Hypertension is one of the most important health issues worldwide (1). In terms of the  
80 global prevalence of hypertension, almost 1.4 billion people, which is almost 20% of the  
81 world population, have hypertension (2). In an evaluation of all risk factors by the World  
82 Health Organization (WHO) and the Global Burden of Disease Study, hypertension ranked  
83 first as a contributor to the burden of disease at 20%, with a contribution greater than that of  
84 obesity (3). Hypertension progresses in approximately 50%, 33%, and 10–15% of cases  
85 caused by coronary artery disease or heart disease, stroke, and renal disease, respectively (1).  
86 It is closely related to ischemic heart disease, which is the leading cause of death worldwide  
87 (4).

88 Hypertension is also classified as an Ambulatory Care-Sensitive Condition (ACSCs),  
89 which means that early diagnosis and intervention are beneficial in preventing the medical  
90 complications that may result in death, hospitalisation, and major medical costs (5). ACSCs  
91 have been classified by the Agency of Health Research and Quality (AHRQ), and 16 diseases  
92 selected by the AHRQ can be prevented from progressing if they are treated effectively in a  
93 timely manner by providing prevention and medical services (6). By treating and managing  
94 these conditions early, hospitalisation due to aggravation or complications of the disease can  
95 be reduced (6). Early intervention in an outpatient setting slows the onset and progression of  
96 the disease (7) and prevents avoidable hospitalisation (5,8).

97 ACSCs are representative indicators for evaluating the accessibility and quality of  
98 primary care, which plays a pivotal role in 'early intervention' (9). To assess the  
99 management of ACSCs in medical institutions, including primary care, COC and MPR are  
100 the most important indicators of measurement tools. COC refers to a continuous relationship

1  
2  
3 101 and consultation between a patient and physician, and the MPR refers to the compliance rate  
4  
5 102 of medications as prescribed by a physician. Therefore, these two measurements are broadly  
6  
7  
8 103 used for the evaluation of the ACSCs management.  
9

10 104 Several studies have focused on hypertension, continuity of care, and medication  
11  
12 105 adherence (10-12). However, the study design of previous studies was limited by the setting,  
13  
14 106 and the small number of patients included (10-12). This study used the National Health  
15  
16 107 Insurance Service (NHIS) database, in which over 50 million patients are registered (13).  
17  
18 108 Patient data include physician visit information and the prescription data for each visit (13).  
19  
20 109 As national health insurance is mandatory for every citizen in South Korea, the reliability of  
21  
22 110 the data is high, and data are representative of the population on a national level (13).  
23  
24  
25

26 111 The objective of this study was to analyse the effect of providing timely and effective  
27  
28 112 ambulatory care to patients with early hypertension on preventing the occurrence of medical  
29  
30 113 complications using COC and the MPR as indicators of effective care. The secondary  
31  
32 114 objective was to assess the outcomes of hypertension according to the level of hospital at  
33  
34 115 which patients were treated.  
35  
36  
37  
38  
39

## 40 117 **METHODS**

41  
42 118 This national, population-based, retrospective cohort study investigated the incidence of  
43  
44 119 hypertension from 1 January 2002 to 31 December 2019 among the general population in  
45  
46 120 South Korea. We analysed the secondary data using national insurance claims data at all levels of  
47  
48 121 hospitals in South Korea. Unlike previous studies on the risk of complications according to the  
49  
50 122 continuity of care and medication adherence, this study examined the time variance, including  
51  
52 123 the time from the first visit to initial 2 years of the medical institution, and limited the  
53  
54 124 patient's age (>30 years) (14).  
55  
56  
57  
58  
59  
60



## 126 **Inclusion and exclusion of participants**

127 This study used the data of 1.4 million individuals from the NHIS database from 2002 to  
128 2019 selected using stratified sampling (13). The NHIS database, which includes the medical  
129 records of more than 50 million people, is stratified by sex and age group (18 strata) (13). To  
130 maintain representativeness, sampling was performed according to the demographic  
131 characteristics and income deciles in South Korea (13). In addition, these cohort data were  
132 linked to the national health check-up database, including data of over 66% of the general  
133 population (over 33 million) in South Korea. Furthermore, information on the cause of death  
134 was provided by linkage to death data from the National Statistical Office (15-16).

135 After excluding patients with missing data for any of the key variables, data on the  
136 medical claims of 102,519 patients with hypertension (International Classification of Disease  
137 code: I.10) were extracted from the NHIS database, covering the 2002–2019 period, and  
138 included in the analysis. No patients were lost to follow-up because all medical records were  
139 registered through the electronic medical record system and tracked in accordance with the  
140 ‘National Health Insurance Act’ established by the Korean government.

141 To avoid bias, we excluded patients who were prescribed drugs less than twice  
142 (n=53,662) to enable proper measurement of the MPR; patients aged <30 years (n=6,630) to  
143 exclude low-risk patients; patients who visited medical institutions in 2002 and 2003  
144 (n=54,180) as a washout period; patients with medical complications (n=5,698) to prevent  
145 contamination of results on the incidence of complications; those who were diagnosed with  
146 hypertension from 2016–2019 (n=38,340) to maintain the baseline characteristics of the  
147 target population; patients who had taken related drugs or undergone related procedures or  
148 surgeries according to the AHRQ guidelines on ACSCs (n=2,047); those who had visited the  
149 medical institution before the index date due to hypertension (n=9,919), or who visited the  
150 emergency room or were hospitalised within 2 years of the index date according to the AHRQ

1  
2  
3 151 guidelines on ACSCs research (n=8,907) to avoid unequal baseline characteristics; those who  
4  
5 152 died within 2 years of the index date (n=1,065) for the washout period of mortality and  
6  
7 153 severity; and patients who visited medical institutions less than four times after the index date  
8  
9 154 (n=22,308) to enable proper measurement of COC. After these exclusions, retrospective data  
10  
11 155 of 102,519 patients (out of 1.4 million members of the general population of South Korea)  
12  
13 156 were included in the analysis (Figure 1).  
14  
15  
16  
17 157

## 18 19 158 **Measurements**

20  
21 159 Continuity of care was defined as ‘continuance of care by a healthcare provider to meet a  
22  
23 160 patient's medical needs providing high quality and harmonised care’ (17). Additionally, with  
24  
25 161 a good level of continuous care provided by the physicians, the hospitalisation rate,  
26  
27 162 prevalence, and the number of medical visits are reduced (18). Methods for measuring  
28  
29 163 continuity of care include the COC, Usual Provider of Care index, Most Frequent Primary  
30  
31 164 Care, and the Modified Continuity Index (19). We utilised COC as an indicator.  
32  
33  
34

35 165 Shortell identified four core factors required for COC (20). First, the data should be of  
36  
37 166 individuals. Second, analysed data should be distinguished and compared when individuals  
38  
39 167 visit different medical institutions and providers. Third, COC should reflect the total number  
40  
41 168 of visits for care. Finally, appropriate referral patterns should also be considered (21). South  
42  
43 169 Korea has a fee-for-service system without a proper referral system (21).  
44  
45  
46

47 170 COC measures continuity of care on a scale of 0 to 1, based on all visits to medical  
48  
49 171 institutions. It weighs both the frequency of visits to each provider and the dispersion of visits  
50  
51 172 between providers. If every visit for medical services to one provider, the COC index will be  
52  
53 173 1. The formula is:

$$54  
55  
56  
57 174 \text{COC} = \frac{\sum_{j=1}^M n_j^2 - N}{N(N-1)}$$

1  
2  
3 175 N=total number of ambulatory care  
4

5  
6 176  $n_j$ =number of visits to provider  
7

8  
9 177 M=total number of provider  
10

11  
12 178  
13

14 179 The major drawback of this method is that it is not applicable if there are fewer than four  
15 visits (22). This is not an ultimate threshold of COC, but is used in practice.  
16

17 180 Medication adherence refers to the degree of compliance with medications prescribed by  
18 a physician. Accurate tracking of prescription data is essential for analysing medication  
19 adherence as well as effectively predicting healthcare costs and utilisation (22). To measure  
20 medication adherence, the MPR and proportion of days covered are usually used for analysis  
21 (12). The formula for MPR is:  
22  
23  
24  
25  
26  
27  
28  
29

30 186 
$$MPR = \frac{\text{Sum of days' supply for all fills in a period}}{\text{\# of days in period}}$$
  
31  
32  
33  
34  
35

36 188 The MPR is usually estimated using prescription data. For example, prescription data  
37 were provided with the defined daily dose. A MPR value of 100% means complete  
38 medication adherence.  
39  
40  
41

42 191 The major limitation of MPR estimation is that it is based on retrospective data review,  
43 and patients may have received unrecorded medication. However, owing to the Korean  
44 pharmaceutical information system, unrecorded prescriptions cannot occur in NHIS data (12).  
45  
46  
47  
48  
49 194 Another limitation of the MPR method is sharing medicine between family members.  
50  
51  
52 195 However, sharing of medication is likely to be minimal, because each medical appointment is  
53 scheduled according to the number of days of medication prescribed in South Korea. The  
54 major strength of the MPR method is that by researching diseases containing data on  
55  
56  
57 197 changeable parameters, such as blood pressure, HbA1c, fasting blood glucose, researchers  
58  
59  
60

1  
2  
3 199 can closely estimate patient health status based on the drugs that they are prescribed. We  
4  
5 200 received professional advice from specialists in internal medicine and cardiology for the  
6  
7 201 selection of antihypertensive drugs and its list (Supplementary Table 1).  
8  
9

10 202 Medical complications of hypertension—coronary artery disease, vascular complications,  
11  
12 203 cerebrovascular disease, heart disease, and hypertensive nephropathy—were selected based  
13  
14 204 on WHO documentation (1). The WHO documentation also includes cognitive impairment as  
15  
16 205 a type of hypertensive complication (1), but as data on mental examination were unavailable,  
17  
18 206 we were unable to include cognitive impairment as a complication in our study.  
19  
20  
21  
22  
23

## 24 208 **Statistical analysis**

25  
26 209 Explanatory variables influencing COC, MPR, and the occurrence of complications in  
27  
28 210 patients with hypertension included sex, age, insurance type, income, outpatient status, COC,  
29  
30 211 MPR level of the patient, number of visits, number of providers, main medical institution, and  
31  
32 212 comorbidities. Patients without values for any of these variables were excluded. Subgroup  
33  
34 213 analysis was performed for primary care visits to assess the efficiency of the healthcare  
35  
36 214 system in South Korea. The statistical significance of differences between the groups was  
37  
38 215 assessed using Student's t-test and analysis of variance. P-values <0.05 were regarded as  
39  
40 216 statistically significant. The Kruskal–Wallis test and Wilcoxon rank-sum test were used to  
41  
42 217 compare continuous variables that were not normally distributed, and Fisher's exact test was  
43  
44 218 used to compare categorical variables between the groups.  
45  
46  
47  
48

49 219 Insurance type is divided into two categories: health insurance beneficiaries and medical  
50  
51 220 aid recipients. The national health insurance system in South Korea enables medical aid  
52  
53 221 recipients to obtain free health services because it is based on the lowest level of household  
54  
55 222 income. Income was divided into 10 categories as described in Supplementary Table 2.  
56  
57

58 223 COC was divided into two categories: high (COC index=1) and low (COC index <1).  
59  
60

1  
2  
3 224 Most COC-related research in South Korea uses this standard because the overall levels of  
4  
5 225 COC in South Korea are high compared with those in other countries. According to  
6  
7 226 Organization for Economic Cooperation and Development (OECD) statistics on healthcare  
8  
9 227 utilisation, South Korea has a three-fold higher outpatient and inpatient medical care use than  
10  
11 228 the OECD average (23). In this study, the mean COC index was 0.8112, confirming the high  
12  
13 229 level of COC in South Korea. In previous studies, the MPR has generally been divided into  
14  
15 230 three categories (>80%, 50–80%, and <50% of MPR) or two categories (>60% and <60% of  
16  
17 231 MPR) (24, 25). However, we decided to use five categories (excellent: 80–100%, good: 60–  
18  
19 232 80%, normal: 40–60%, bad: 20–40%, and very bad: 0–20%) to enable more detailed analysis  
20  
21 233 of the MPR. Outpatient status, number of visits, number of providers, and main medical  
22  
23 234 institution are required factors for calculating the COC level.

24  
25  
26  
27  
28 235 The term ‘comorbidity’ indicates that patients or participants have different diseases that  
29  
30 236 can affect the results of the study. Comorbidities are sometimes confused with complications,  
31  
32 237 but comorbidities differ from complications because they do not occur as a result of the target  
33  
34 238 disease. Defining comorbidities plays a pivotal role in risk adjustment because confounding  
35  
36 239 can occur if the results are not adjusted for comorbidities.

37  
38  
39  
40 240 In this study, we selected diabetes and dyslipidaemia as comorbidities, which are co-  
41  
42 241 factors of cardiovascular disease, cerebrovascular disease, and hypertensive nephropathy (26-  
43  
44 242 28). These two types of disease could affect the incidence of hypertensive complications.

45  
46  
47 243 Categorical variables associated with the level of COC (low vs high), were compared  
48  
49 244 using the chi-square test. A comparison of complications according to the COC and MPR was  
50  
51 245 performed using Kaplan–Meier survival curves and log-rank tests. The differences in medical  
52  
53 246 complications according to COC and MPR were examined. The Cox proportional hazards  
54  
55 247 model was used to compare the risk. Hazard ratios (HRs) and 95% confidence intervals (CIs)  
56  
57 248 were estimated using multivariable Cox proportional hazards regression.

1  
2  
3 249  
45 **Ethical issues**  
6

7  
8 251 Ethics approval for the study was obtained from the Institutional Review Board at Korea  
9  
10 252 University (IRB document no. KUIRB-2021-0333-01). Informed consent was not required  
11  
12 253 owing to the retrospective nature of the study. The study has been prepared in accordance  
13  
14 254 with the STROBE guidelines. This study was conducted in accordance with the Declaration  
15  
16  
17 255 of Helsinki.

18  
19 256  
2021 **Patient and public involvement**  
22

23  
24 258 We did not involve patients and public in this study because it was a retrospective study  
25  
26 259 using data from the NHIS database.

27  
28 260  
2930 **RESULTS**  
31

32  
33 262 The average COC level in the hypertension group was 0.8112. The average MPR in the  
34  
35 263 hypertension group was 73.3%.

36  
37 264  
3839 **General characteristics of patients with hypertension**  
40

41  
42 266 The patient characteristics are shown in Supplementary Table 1. Of the patients, 51,522  
43  
44 267 (50.3%) were male and 50,997 (49.7%) were female. The over 80year age group was the  
45  
46 268 largest age group (27.0%), followed by the 70–79 year (21.5%) and 60–69-year (18.1%) age  
47  
48 269 groups. The vast majority of patients (94.0%) were covered by national health insurance. The  
49  
50 270 largest income categories were the 9th–10th decile (27.0%), followed by the 7th–8th decile  
51  
52 271 (21.5%) and the 5th–6th decile (18.1%). The most common outpatient visit categories were  
53  
54 272 7–9 visits (29.7%), followed by 10–12 visits (29.5%), and  $\geq 13$  visits (25.0%). Of the patients,  
55  
56 273 50.9% visited only one provider and 31.0% visited two providers. The majority of patients  
57  
58  
59  
60

274 visited clinics (70.8%). The most common comorbidities were dyslipidaemia (49.8%) and  
 275 diabetes (28.7%). Approximately half the patients (50.9%) had a high level of COC. The  
 276 majority of patients (55.5%) had an excellent MPR. The most frequent years of diagnosis  
 277 were 2004 (10.1%), 2005 (12.1%), and 2006 (10.1%).

278

### 279 **Risk of complications of hypertension according to the COC and MPR level**

280 Compared with the high COC group, participants in the low COC group had a  
 281 significantly higher risk of complications (HR: 1.14, 95% CI: 1.10–1.17) (Table 1).

282

283 **Table 1. Risk of complications of hypertension according to the COC level**

| COC level | No. of patients | No. of events | IR per 1,000 PYR | HR <sup>a</sup> (95% CI)   | <i>p</i>         |
|-----------|-----------------|---------------|------------------|----------------------------|------------------|
| High      | 52,179          | 7,143         | 15.4             | Ref                        |                  |
| Low       | 50,340          | 8,142         | 17.7             | <b>1.14 (1.10–1.17)***</b> | <b>&lt;0.001</b> |

284 CI, confidence interval; COC, continuity of care; HR, hazard ratio; IR, incidence rate; PYR,  
 285 person-years at risk

286 <sup>a</sup> Adjusted for sex, age, insurance type, income, number of visits, number of providers, level of  
 287 hospital, and Comorbidities

288 \*\*\*, *p*<0.001

289

290 Compared with the excellent MPR group, the risk of developing hypertensive  
 291 complications was significantly higher in the good, normal, bad, and very bad MPR groups  
 292 (Table 2).

293

294 **Table 2. Risk of hypertensive complications according to the MPR level**

| MPR level | No. of patients | No. of events | IR per 1,000<br>PYR | HR <sup>a</sup> (95% CI)   | <i>p</i>         |
|-----------|-----------------|---------------|---------------------|----------------------------|------------------|
| Excellent | 56,939          | 7,143         | 14.1                | Ref                        |                  |
| Good      | 16,012          | 2,695         | 17.9                | <b>1.24 (1.18–1.29)***</b> | <b>&lt;0.001</b> |
| Normal    | 11,808          | 2,146         | 19.5                | <b>1.36 (1.29–1.42)***</b> | <b>&lt;0.001</b> |
| Bad       | 9,996           | 1,834         | 20.3                | <b>1.42 (1.35–1.50)***</b> | <b>&lt;0.001</b> |
| Very bad  | 7,764           | 1,467         | 21.4                | <b>1.50 (1.42–1.59)***</b> | <b>&lt;0.001</b> |

295 HR, hazard ratio; IR, incidence rate; MPR, medication possession ratio; PYR, person-years at  
 296 risk

297 <sup>a</sup> Adjusted for sex, age, insurance type, income, number of visits, number of providers, level  
 298 of hospital, and Comorbidities

299 \*\*\*, *p*<0.001

### 301 **Risk of specific types of hypertension complication according to the COC and MPR** 302 **levels**

303 Kaplan–Meier survival curves showing the time until complications occurred according to  
 304 the COC and MPR are shown in Supplementary Figures 1 and 2, respectively. The risks of  
 305 developing coronary artery disease, vascular complications, cerebrovascular disease, heart  
 306 disease, and hypertensive nephropathy according to each COC and MPR level are shown in  
 307 Tables 3 and 4, respectively. Patients with diabetes and high cholesterol had a higher  
 308 incidence of hypertensive complications than patients without diabetes and high cholesterol,  
 309 respectively.

310



311 **Table 3. Risk of medical complications of hypertension according to the COC level**

| Complication             | Parameter                | COC level |                            |
|--------------------------|--------------------------|-----------|----------------------------|
|                          |                          | High      | Low                        |
| CAD                      | Events (N)               | 2,117     | 2,350                      |
|                          | IR per 1,000 PYR         | 4.4       | 4.9                        |
|                          | HR <sup>a</sup> (95% CI) | Ref       | <b>1.10 (1.03–1.16)**</b>  |
|                          | <i>p</i>                 | -         | <b>0.002</b>               |
| Vascular complications   | Events (N)               | 412       | 451                        |
|                          | IR per 1,000 PYR         | 0.8       | 0.9                        |
|                          | HR <sup>a</sup> (95% CI) | Ref       | 1.07 (0.94–1.23)           |
|                          | <i>p</i>                 | -         | 0.302                      |
| Cerebrovascular disease  | Events (N)               | 3,639     | 4,178                      |
|                          | IR per 1,000 PYR         | 7.6       | 8.7                        |
|                          | HR <sup>a</sup> (95% CI) | Ref       | <b>1.14 (1.09–1.19)***</b> |
|                          | <i>p</i>                 | -         | <b>&lt;0.001</b>           |
| Heart disease            | Events (N)               | 2,602     | 2,951                      |
|                          | IR per 1,000 PYR         | 5.4       | 6.1                        |
|                          | HR <sup>a</sup> (95% CI) | Ref       | <b>1.11 (1.06–1.17)***</b> |
|                          | <i>p</i>                 | -         | <b>&lt;0.001</b>           |
| Hypertensive nephropathy | Events (N)               | 716       | 768                        |
|                          | IR per 1,000 PYR         | 1.5       | 1.6                        |
|                          | HR <sup>a</sup> (95% CI) | Ref       | 1.05 (0.95–1.16)           |
|                          | <i>p</i>                 | -         | 0.367                      |

312 CAD, coronary artery disease; CI, confidence interval; COC, continuity of care; HR, hazard

313 ratio; IR, incidence rate; N, Number; PYR, person-years at risk

1  
2  
3 314 <sup>a</sup> Adjusted for sex, age, insurance type, income, number of visits, number of providers, level  
4  
5 315 of hospital, and Comorbidities  
6  
7  
8 316 \*\*,  $p < .01$  \*\*\*,  $p < 0.001$   
9  
10  
11  
12  
13  
14  
15  
16  
17  
18  
19  
20  
21  
22  
23  
24  
25  
26  
27  
28  
29  
30  
31  
32  
33  
34  
35  
36  
37  
38  
39  
40  
41  
42  
43  
44  
45  
46  
47  
48  
49  
50  
51  
52  
53  
54  
55  
56  
57  
58  
59  
60

For peer review only

317 **Table 4. Risk of medical complications of hypertension according to the MPR level**

| Complication            | Parameter                | MPR level |                            |                            |                            |                            |
|-------------------------|--------------------------|-----------|----------------------------|----------------------------|----------------------------|----------------------------|
|                         |                          | Excellent | Good                       | Normal                     | Bad                        | Very bad                   |
| CAD                     | Events (N)               | 2,081     | 811                        | 635                        | 535                        | 405                        |
|                         | IR per 1,000 PYR         | 4         | 5.1                        | 5.5                        | 5.6                        | 5.5                        |
|                         | HR <sup>a</sup> (95% CI) | Ref       | <b>1.26 (1.16–1.37)***</b> | <b>1.35 (1.23–1.47)***</b> | <b>1.38 (1.26–1.52)***</b> | <b>1.38 (1.24–1.53)***</b> |
|                         | <i>p</i>                 | -         | <b>&lt;0.001</b>           | <b>&lt;0.001</b>           | <b>&lt;0.001</b>           | <b>&lt;0.001</b>           |
| Vascular complications  | Events (N)               | 393       | 154                        | 120                        | 107                        | 89                         |
|                         | IR per 1,000 PYR         | 0.7       | 1                          | 1                          | 1.1                        | 1.2                        |
|                         | HR <sup>a</sup> (95% CI) | Ref       | <b>1.25 (1.04–1.51)*</b>   | <b>1.33 (1.08–1.63)**</b>  | <b>1.45 (1.17–1.79)***</b> | <b>1.59 (1.26–2.00)***</b> |
|                         | <i>p</i>                 | -         | <b>0.018</b>               | <b>0.007</b>               | <b>0.001</b>               | <b>&lt;0.001</b>           |
| Cerebrovascular disease | Events (N)               | 3,613     | 1,312                      | 1,120                      | 997                        | 775                        |
|                         | IR per 1,000 PYR         | 6.9       | 8.4                        | 9.8                        | 10.6                       | 10.8                       |

| Complication             | Parameter                | MPR level |                                 |                                 |                                 |                                 |
|--------------------------|--------------------------|-----------|---------------------------------|---------------------------------|---------------------------------|---------------------------------|
|                          |                          | Excellent | Good                            | Normal                          | Bad                             | Very bad                        |
|                          | HR <sup>a</sup> (95% CI) | Ref       | <b>1.18 (1.11–<br/>1.26)***</b> | <b>1.38 (1.29–<br/>1.47)***</b> | <b>1.51 (1.41–<br/>1.62)***</b> | <b>1.54 (1.43–<br/>1.67)***</b> |
|                          | <i>p</i>                 | -         | <b>&lt;0.001</b>                | <b>&lt;0.001</b>                | <b>&lt;0.001</b>                | <b>&lt;0.001</b>                |
| Heart disease            | Events (N)               | 2,585     | 981                             | 788                             | 659                             | 540                             |
|                          | IR per 1,000 PYR         | 4.9       | 6.2                             | 6.8                             | 6.9                             | 7.4                             |
|                          | HR <sup>a</sup> (95% CI) | Ref       | <b>1.21 (1.13–<br/>1.30)***</b> | <b>1.33 (1.23–<br/>1.44)***</b> | <b>1.36 (1.25–<br/>1.48)***</b> | <b>1.47 (1.34–<br/>1.62)***</b> |
|                          | <i>p</i>                 | -         | <b>&lt;0.001</b>                | <b>&lt;0.001</b>                | <b>&lt;0.001</b>                | <b>&lt;0.001</b>                |
| Hypertensive nephropathy | Events (N)               | 633       | 278                             | 232                             | 194                             | 147                             |
|                          | IR per 1,000 PYR         | 1.2       | 1.7                             | 2                               | 2                               | 2                               |
|                          | HR <sup>a</sup> (95% CI) | Ref       | <b>1.39 (1.21–<br/>1.60)***</b> | <b>1.58 (1.36–<br/>1.84)***</b> | <b>1.62 (1.38–<br/>1.90)***</b> | <b>1.62 (1.35–<br/>1.94)***</b> |
|                          | <i>p</i>                 | -         | <b>&lt;0.001</b>                | <b>&lt;0.001</b>                | <b>&lt;0.001</b>                | <b>&lt;0.001</b>                |

318 CAD, coronary artery disease; CI, confidence interval; HR, hazard ratio; MPR, medication possession ratio; N, Number; PYR, person-years at  
 319 risk

1  
2  
3  
4  
5  
6  
7  
8  
9  
10  
11  
12  
13  
14  
15  
16  
17  
18  
19  
20  
21  
22  
23  
24  
25  
26  
27  
28  
29  
30  
31  
32  
33  
34  
35  
36  
37  
38  
39  
40  
41  
42  
43  
44  
45  
46

320 <sup>a</sup> Adjusted for sex, age, insurance type, income, number of visits, number of providers, level of hospital, and Comorbidities

321 \*,  $p < .05$ ; \*\*,  $p < .01$  \*\*\*,  $p < 0.001$

For peer review only

1  
2  
3 322 The risk of coronary artery disease was significantly higher in the low than in the high COC  
4  
5 323 group (HR: 1.10, 95% CI: 1.03–1.16) (Table 3). Compared with the excellent MPR group, the  
6  
7  
8 324 risk of coronary artery disease was significantly higher in the good, normal, bad, and very bad  
9  
10 325 MPR groups (Table 4).

11  
12 326 The risk of vascular complications did not differ significantly according to the COC level  
13  
14 327 (Table 3). Compared with the excellent MPR group, the risk of vascular complications was  
15  
16  
17 328 significantly higher in the good, normal, bad, and very bad MPR groups (Table 4).

18  
19 329 The risk of cerebrovascular disease was significantly higher in the low continuity group  
20  
21 330 than the high COC group (HR: 1.14, 95% CI: 1.09–1.19) (Table 3). Compared with the  
22  
23  
24 331 excellent MPR group, the risk of cerebrovascular disease was significantly higher in the good,  
25  
26 332 normal, bad, and very bad MPR groups (Table 4).

27  
28 333 The risk of heart disease was significantly higher in the low COC than in the high COC  
29  
30 334 group (HR: 1.11, 95% CI: 1.06–1.17) (Table 3). Compared with the excellent MPR group, the  
31  
32  
33 335 risk of heart disease was significantly higher in the good, normal, bad, and very bad MPR  
34  
35 336 groups (Table 4).

36  
37 337 The risk of hypertensive nephropathy did not differ significantly according to the COC  
38  
39 338 level (Table 3). Compared with the excellent MPR group, the risk of hypertensive nephropathy  
40  
41  
42 339 was significantly higher in the good, normal, bad, and very bad MPR groups (Table 4).  
43  
44  
45 340

#### 46 47 341 **Subgroup analysis of risk of medical complications according to the COC and MPR** 48 49 342 **levels in primary care clinics**

50  
51 343 A subgroup analysis of the risk of medical complications according to the COC level and  
52  
53 344 MPR in patients with hypertension attending primary care clinics showed that the risk of  
54  
55  
56 345 developing complications was significantly higher in the low than in the high COC group  
57  
58 346 (HR: 1.16, 95% CI: 1.12–1.21). Compared with the excellent MPR group, the risk of  
59  
60

1  
2  
3 347 developing hypertensive complications was significantly higher in the good, normal, bad, and  
4  
5 348 very bad MPR groups. Compared with patients who had 4–6 visits, the risk of developing  
6  
7 349 medical complications was significantly lower in patients with 7–9, 10–12, or  $\geq 13$  visits  
8  
9  
10 350 (Supplementary Table 3).

11 351

## 12 352 **DISCUSSION**

13  
14  
15  
16  
17 353 In this study, we analysed the differences in hypertensive complications according to  
18  
19 354 continuity of care and medication adherence in patients with hypertension. The study  
20  
21 355 highlights the fact that COC and MPR were associated with the occurrence of complications  
22  
23 356 caused by hypertension. Overall, for patients with hypertension in the low as compared to the  
24  
25 357 high COC group, the risk of complications was significantly higher. In this study, the order of  
26  
27 358 establishing health policies related to COC, MPR can increase the response and lower the risk  
28  
29 359 of long-term complications within the first 2 years of diagnosis of hypertension. Similarly,  
30  
31 360 the risk of developing coronary artery disease, cerebrovascular disease, and heart disease was  
32  
33 361 greater in the low as compared to the high COC group. Regarding overall medication  
34  
35 362 adherence, in comparison to the excellent MPR group (80–100%), the good (60–79%),  
36  
37 363 normal (40–59%), bad (20–39%), and very bad groups (0–19%) were at significantly higher  
38  
39 364 risk of developing hypertensive complications, such as coronary artery disease, vascular  
40  
41 365 complications, cerebrovascular disease, heart disease, and hypertensive nephropathy.

42  
43  
44  
45  
46 366 Other COC and MPR studies have found that patients with low medication adherence are  
47  
48 367 more likely to result in progress to inpatient or mortality (HR: 1.24, 95% CI: 1.18–1.29). The  
49  
50 368 differences were attributed to the type of antihypertensive medication, follow-up period, and  
51  
52 369 the differences in the definition of medication adherence. We overcame these limitations  
53  
54 370 because of the 18-year follow-up period.

55  
56  
57 371 Another MPR study showed that low medication adherence is more likely to result in

1  
2  
3 372 progress to inpatient or mortality (HR: 1.57, 95% CI: 1.40–1.76). This result is similar to that  
4  
5 373 of our study (29).

6  
7  
8 374 Other COC and MPR studies focused on hypertension and diabetes, and found that for  
9  
10 375 hypertension, low COC medication adherence is more likely to result in progress to death in  
11  
12 376 hospitalised patients (HR: 1.66, 95% CI: 1.55–1.77; HR: 1.14, 95% CI: 1.08–1.20,  
13  
14 377 respectively). Low COC and medication adherence are more likely to result in progress to  
15  
16 378 hospitalisation or death among outpatients (HR: 1.67, 95% CI: 1.47–1.90). The differences  
17  
18 379 were attributed to the fact that the incidence of hypertensive complications was not among  
19  
20 380 their outcomes, and the reason for hospitalisation varied, potentially causing the  
21  
22 381 overestimation of the results.

23  
24  
25 382 This study had several strengths. First, the study obtained population representativeness  
26  
27 383 because we utilised NHIS data and the subscription of national health insurance is legally  
28  
29 384 mandatory (covering approximately 99.7%) in South Korea. Second, the disease was selected  
30  
31 385 from AHRQ standards of ACSCs and hypertensive complications were selected according to  
32  
33 386 the definitions from WHO (1). Third, there is a standard in ACSCs related to hypertension (no  
34  
35 387 cardiac procedures included), which is often omitted in previous studies, and this is the first  
36  
37 388 attempt at a long-term (18-year) analysis of ACSCs (hypertension) with a clearer definition of  
38  
39 389 patients and its incidence rate of complications.

40  
41  
42 390 However, this study also had several limitations. First, as only the continuity of care and  
43  
44 391 medication adherence in the initial 2 years were measured, follow-up after 2 years was not  
45  
46 392 reflected in the effects of changes in care. Second, the risk of complications or blood pressure  
47  
48 393 level was not analysed in this study. Third, whether other underlying diseases or external  
49  
50 394 factors may affect the results, such as familial aggregation, the levels of blood pressure, and  
51  
52 395 over-prescription of drugs, of this study could not be fully excluded. Fourth, owing to the  
53  
54 396 retrospective nature of this observational study, misclassification or recall bias may impact the  
55  
56  
57  
58  
59  
60



1  
2  
3 397 validity of this study. Finally, this study can be elevated to mortality or factor study. The  
4  
5 398 case-control or prospective cohort study to elucidate the association between COC, MPR  
6  
7  
8 399 levels, and the mortality of patients with hypertensive complications with its characteristics.  
9

10 400 There are several policies for the management of ACSCs worldwide. For example, there  
11  
12 401 are policies for diabetes, cervical cancer, and asthma in Australia and policies for depression,  
13  
14 402 cancer, and asthma in the UK and USA; it is possible to provide primary care in a timely  
15  
16 403 manner and manage chronic diseases more efficiently by including more diseases subject to  
17  
18 404 chronic disease management in the ACSCs (30). Therefore, a follow-up study on the  
19  
20 405 differences in the risk of complications according to changes in care should be conducted in  
21  
22 406 the future.  
23  
24  
25

26 407 This study sheds light on the association between continuity of care and medication  
27  
28 408 adherence and the incidence of hypertensive complications, such as coronary artery disease  
29  
30 409 and heart disease. The continuous management of blood pressure can be beneficial to prevent  
31  
32 410 hypertensive complications among patients with hypertension. The implication should be  
33  
34 411 based on subgroup analysis (Supplementary file).; visiting primary care facilities is  
35  
36 412 adequately beneficial to patients with hypertension. Therefore, the Korean government  
37  
38 413 should establish health policies related to chronic diseases that need management with a view  
39  
40 414 to long-term care. Moreover, because of its unique structure (lack of a gatekeeper system  
41  
42 415 [referral system]), the healthcare system of South Korea is facing a financial shortage. Future  
43  
44 416 studies should compare the cost-effectiveness of care provided by different types of medical  
45  
46 417 institutions, such as general hospitals and clinics.  
47  
48  
49  
50

51 418

#### 52 419 **Authors' contributions**

53  
54 420 Conceptualisation: Dayea Kim, Methodology: Dayea Kim, Software: Dayea Kim, Data  
55  
56 421 curation: Dayea Kim, Writing – Original draft preparation: Jaewoo Cha, Visualisation: Jaewoo  
57  
58  
59  
60

1  
2  
3 422 Cha, Investigation: Dayea Kim, Jaewoo Cha, Supervision: Jaewoo Cha, Validation: Jaewoo

4  
5 423 Cha, Writing – Reviewing and editing: Dayea Kim, Jaewoo Cha

6  
7  
8 424

9  
10 425 **Competing interests**

11  
12 426 None declared.

13  
14  
15 427

16  
17 428 **Funding**

18  
19 429 This research received no specific grant from any funding agency in the public, commercial or

20  
21 430 not-for-profit sectors.

22  
23  
24 431

25  
26 432 **Data sharing statement**

27  
28 433 Raw data were generated by the National Health Insurance Service. Derived data supporting

29  
30 434 the findings of this study are available from the corresponding author, Jaewoo Cha, on request.

31  
32  
33 435

34  
35 436 **Ethics statements**

36  
37 437 Ethics approval for the study was obtained from the Institutional Review Board at Korea

38 438 University (IRB document no. KUIRB-2021-0333-01). Informed consent was not required due

39 439 to the retrospective nature of the study.

40  
41  
42 440

43  
44 441 **Patient consent for publication**

45  
46 442 Not applicable.

47  
48  
49 443

50  
51 444 **Acknowledgements**

52  
53 445 We thank Editage ([www.editage.co.kr](http://www.editage.co.kr)) for English language editing.

54  
55  
56 446

57  
58 447

59  
60

448

449

**REFERENCES**

1. World Health Organisation. Hypertension. [https://www.who.int/health-topics/hypertension#tab=tab\\_1](https://www.who.int/health-topics/hypertension#tab=tab_1) (accessed 27 Nov 2022).

2. World Health Organisation. More than 700 million people with untreated hypertension. <https://www.who.int/news/item/25-08-2021-more-than-700-million-people-with-untreated-hypertension> (accessed 27 Nov 2022).

3. Forouzanfar MH, Liu P, Roth GA, et al. Global burden of hypertension and systolic blood pressure of at least 110 to 115 mm Hg, 1990–2015. *JAMA* 2017;317:165–82.

4. Liu J, Bu X, Wei L, et al. Global burden of cardiovascular diseases attributable to hypertension in young adults from 1990 to 2019. *J Hypertens* 2021;39:2488–96.

5. Ansari Z. The Concept and usefulness of ambulatory care sensitive conditions as indicators of quality and access to primary health care. *Aust J Prim Health* 2007;13:91.

6. Lin W, Huang I, Wang S, Yang M, Yaung C. Continuity of diabetes care is associated with avoidable hospitalizations: evidence from Taiwan's National Health Insurance scheme. *Int J Qual Health Care* 2009;22:3–8.

7. Billings J, Zeitel L, Lukomnik J, et al. Impact Of socioeconomic status on hospital use in New York City. *Health Aff (Millwood)* 1993;12:162–73.

8. Gao J, Moran E, Li Y, Almenoff P. Predicting potentially avoidable hospitalizations. *Med Care* 2014;52:164–71.

9. Laditka J, Laditka S, Mastanduno M. Hospital utilization for ambulatory care sensitive conditions: health outcome disparities associated with race and ethnicity. *Soc Sci Med* 2003;57:1429–41.

- 1  
2  
3 472 10. Shin S, Song H, Oh SK, Choi KE, Kim H, Jang S. Effect of antihypertension medication  
4  
5 473 adherence on hospitalization for cardiovascular disease and mortality in hypertension  
6  
7 474 patients. *Hypertens Res*. 2013;36:1000–5.
- 8  
9  
10 475 11. Nam Y, Cho K, Kang H, et al. Greater continuity of care reduces hospital admissions in  
11  
12 476 patients with hypertension: an analysis of nationwide health insurance data in Korea, 2011–  
13  
14 477 2013. *Health Policy* 2016;120:604–11.
- 15  
16  
17 478 12. Gygli N, Zúñiga F, Simon M. Regional variation of potentially avoidable hospitalisation  
18  
19 479 in Switzerland: an observational study. *BMC Health Serv Res* 2021;21:849.
- 20  
21  
22 480 13. National Health Insurance Service. National Health Insurance Data Sharing Service.  
23  
24 481 <https://nhiss.nhis.or.kr/bd/ab/bdaba012eng.do> (accessed 27 Nov 2022).
- 25  
26 482 14. Christakis DA, Wright JA, Koepsell TD, et al. Is greater continuity of care associated  
27  
28 483 with less emergency department utilization? *Pediatrics* 1999;103:738–42.
- 29  
30  
31 484 15. Statistics Korea. Statistics Korea – Cause of death.  
32  
33 485 <https://kostat.go.kr/portal/eng/index.action> (accessed 2 Dec 2022).
- 34  
35 486 16. KOSIS. KOSIS: Life table. KOSIS.  
36  
37  
38 487 [https://kosis.kr/statHtml/statHtml.do?orgId=101&tblId=DT\\_1B42&conn\\_path=I2](https://kosis.kr/statHtml/statHtml.do?orgId=101&tblId=DT_1B42&conn_path=I2). Published  
39  
40  
41 488 December 6, 2022. Accessed April 25, 2023.
- 42  
43  
44 489 17. Citro R, Ghosh S, Churgin PG. A fundamental metric for continuity of care: modeling  
45  
46 490 and performance evaluation. *IEEE Trans Inf Technol Biomed* 1997;1:189–204.
- 47  
48  
49 491 18. Tom J, Tseng C, Davis J, et al. Missed well-child care visits, low continuity of care, and  
50  
51 492 risk of ambulatory care-sensitive hospitalizations in young children. *Arch Pediatr Adolesc*  
52  
53 493 *Med* 2010;164:1052–8.
- 54  
55  
56  
57  
58  
59  
60

- 1  
2  
3 494 19. Hong JS, Kim JY, Kang HC. Continuity of ambulatory care among adult patients for type  
4  
5 495 2 diabetes and its associated factors in Korea. *Korean J Health Policy and Adm.* 2009;19:51–  
6  
7 496 70.  
8  
9  
10 497 20. Shortell SM. Continuity of medical care: conceptualization and measurement. *Med Care*  
11  
12 498 1976;14:377–91.  
13  
14 499 21. Bice TW, Boxerman SB. A quantitative measure of continuity of care. *Med Care*  
15  
16 500 1977;15:347–9.  
17  
18  
19 501 22. Christakis DA, Wright JA, Koepsell TD, et al. Is greater continuity of care associated  
20  
21 502 with less emergency department utilization? *Pediatrics* 1999;103:738–42.  
22  
23  
24 503 23. Statistics Office, Korea. The number of outpatient visit in Korea.  
25  
26 504 <https://www.index.go.kr/unify/idx-info.do?idxCd=4240> (accessed 10 Apr 2023).  
27  
28  
29 505 24. Pittman DG, Chen W, Bowlin SJ, et al. Adherence to statins, subsequent healthcare costs,  
30  
31 506 and cardiovascular hospitalizations. *Am J Cardiol* 2011;107:1662–6.  
32  
33 507 25. Han E, Suh DC, Lee SM, et al. The impact of medication adherence on health outcomes  
34  
35 508 for chronic metabolic diseases: A retrospective cohort study. *Res Social Adm Pharm*  
36  
37 509 2014;10:e87–98.  
38  
39  
40 510 26. World Health Organization. Cardiovascular diseases (cvds). World Health Organization.  
41  
42 511 Accessed May 27, 2023. [https://www.who.int/news-room/fact-sheets/detail/cardiovascular-](https://www.who.int/news-room/fact-sheets/detail/cardiovascular-diseases-(cvds))  
43  
44 512 [diseases-\(cvds\).](https://www.who.int/news-room/fact-sheets/detail/cardiovascular-diseases-(cvds))  
45  
46  
47 513 27. Lee HY, Shin J, Kim GH, et al. 2018 Korean Society of Hypertension Guidelines for the  
48  
49 514 management of hypertension: Part II-diagnosis and treatment of hypertension. *Clin Hypertens*  
50  
51 515 2019;25:20.  
52  
53  
54 516 28. Burnier M, Damianaki A. Hypertension as cardiovascular risk factor in chronic kidney  
55  
56 517 disease. *Circ Res* 2023;132:1050–63.  
57  
58  
59 518 29. Shin S, Song H, Oh SK, et al. Effect of antihypertensive medication  
60

- 1  
2  
3 519 adherence on hospitalization for cardiovascular disease and mortality in hypertensive  
4  
5 520 patients. *Hypertens Res* 2013;36:1000–5.  
6  
7 521 30. Santos R, Rice N, Gravelle H. Patterns of emergency admissions for ambulatory care  
8  
9 522 sensitive conditions: A spatial cross-sectional analysis of observational data. *BMJ Open*  
10  
11 523 2020;10:e039910.  
12  
13  
14  
15  
16  
17  
18  
19  
20  
21  
22  
23  
24  
25  
26  
27  
28  
29  
30  
31  
32  
33  
34  
35  
36  
37  
38  
39  
40  
41  
42  
43  
44  
45  
46  
47  
48  
49  
50  
51  
52  
53  
54  
55  
56  
57  
58  
59  
60

For peer review only

1  
2  
3  
4  
5  
6  
7  
8  
9  
10  
11  
12  
13  
14  
15  
16  
17  
18  
19  
20  
21  
22  
23  
24  
25  
26  
27  
28  
29  
30  
31  
32  
33  
34  
35  
36  
37  
38  
39  
40  
41  
42  
43  
44  
45  
46  
47  
48  
49  
50  
51  
52  
53  
54  
55  
56  
57  
58  
59  
60

524 **Figure legend**

525 **Figure 1.** Flow diagram of the study population  
526

For peer review only

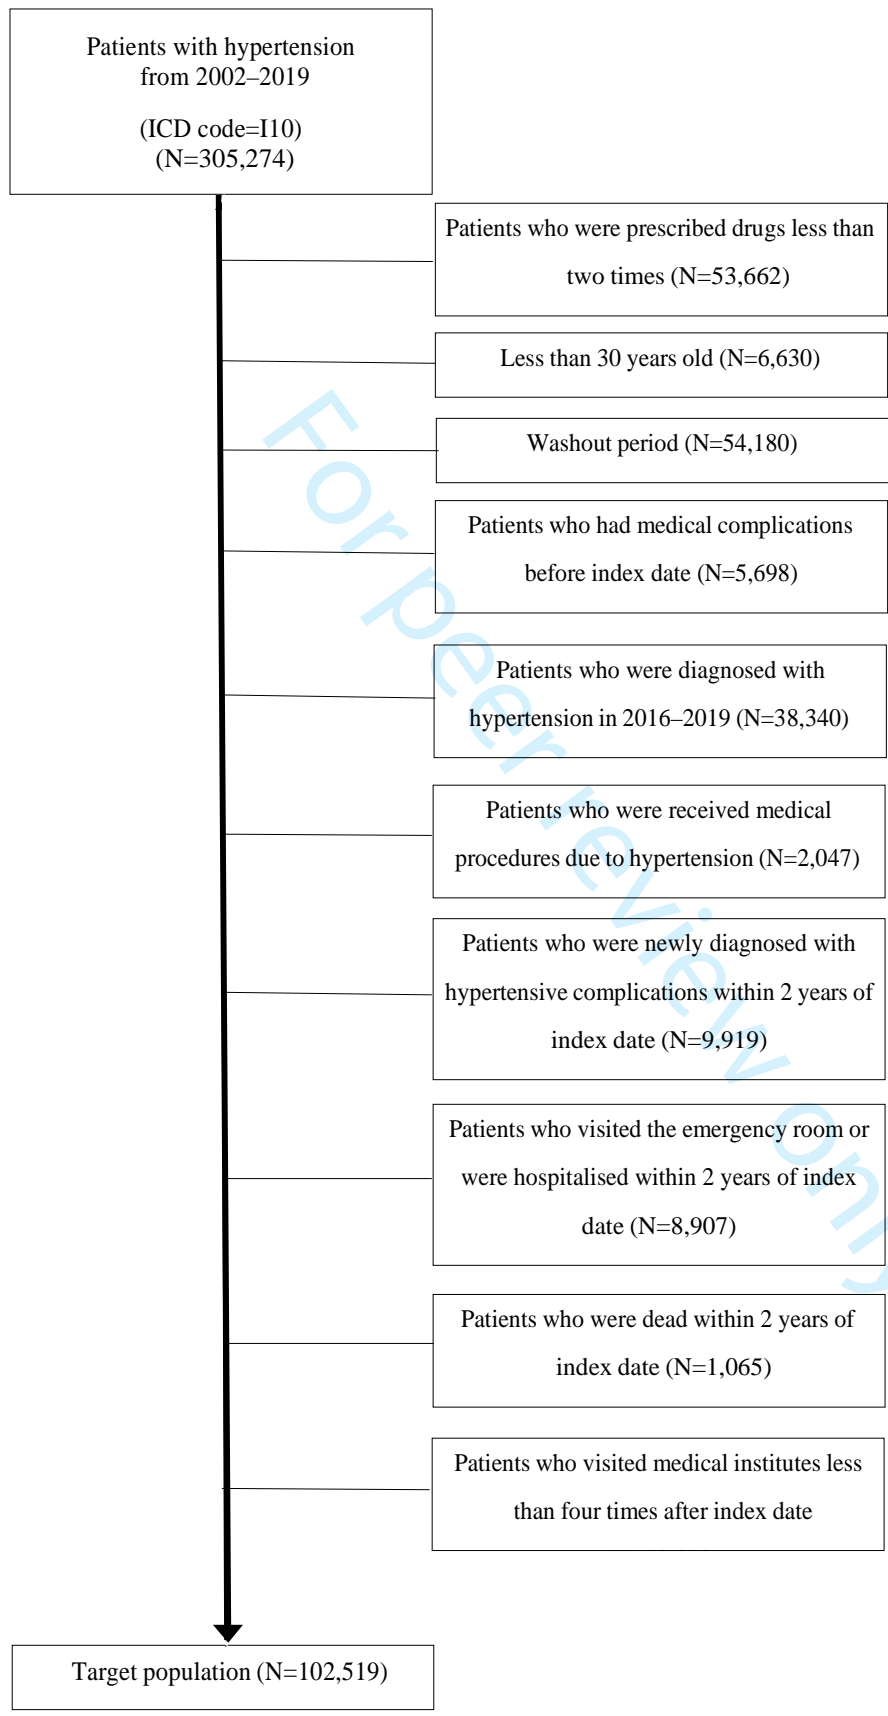



1  
2  
3  
4  
5  
6  
7  
8  
9  
10  
11  
12  
13  
14  
15  
16  
17  
18  
19  
20  
21  
22  
23  
24  
25  
26  
27  
28  
29  
30  
31  
32  
33  
34  
35  
36  
37  
38  
39  
40  
41  
42  
43  
44  
45  
46  
47  
48  
49  
50  
51  
52  
53  
54  
55  
56  
57  
58  
59  
60

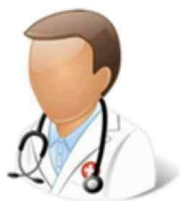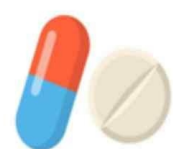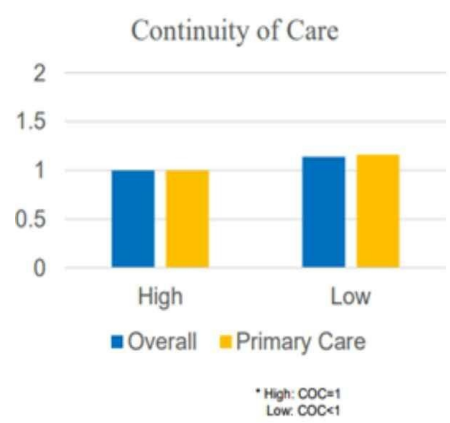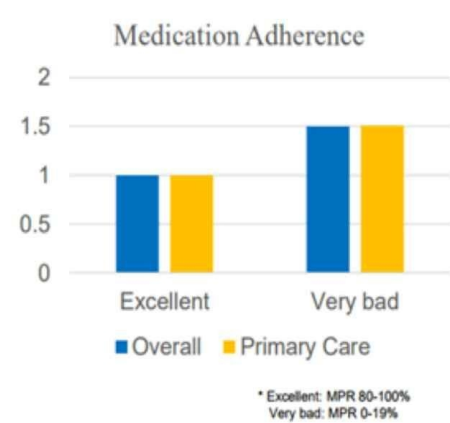

294x227mm (120 x 120 DPI)

**Supplementary Materials****Supplementary Table 1. Antihypertensive drugs included**

| Drugs included                                                                                                                                                                                                                                                                                                                                                                                                                                              |
|-------------------------------------------------------------------------------------------------------------------------------------------------------------------------------------------------------------------------------------------------------------------------------------------------------------------------------------------------------------------------------------------------------------------------------------------------------------|
| Captopril, enalapril, ramipril, candesartan, fimasartan, losartan, olmesartan, telmisartan, valsartan, carteolol, nadolol, propranolol, nifedipine, felodipine, amlodipine, lercanidipine, CCB, diltiazem, verapamil, atenolol, bisoprolol, celiprolol, metoprolol, amosulalol, carvedilol, bevantolol, doxazosin, terazosin, hydrochlorothiazide, indapamide, furosemide, torsemide, spironolactone, amiloride, hydralazine, minoxidil, and nitroprusside. |

peer review only

**Supplementary Table 2. General characteristics of the study population**

| Variable            |                                         | N       | %     |
|---------------------|-----------------------------------------|---------|-------|
| Total               |                                         | 102,519 | 100.0 |
| Sex                 | Male                                    | 51,522  | 50.3  |
|                     | Female                                  | 50,997  | 49.7  |
| Age                 | 30–39                                   | 2,084   | 2.0   |
|                     | 40–49                                   | 16,943  | 16.5  |
|                     | 50–59                                   | 15,266  | 14.9  |
|                     | 60–69                                   | 18,532  | 18.1  |
|                     | 70–79                                   | 22,056  | 21.5  |
|                     | >80                                     | 27,638  | 27.0  |
| Insurance type      | National Health Insurance               | 96,325  | 94.0  |
|                     | Others                                  | 6,194   | 6.0   |
| Income              | 0 decile (0 USD)                        | 284     | 2.0   |
|                     | 1st and 2nd deciles (857–1,781 USD)     | 16,943  | 16.5  |
|                     | 3rd and 4th deciles (2,609–3,273 USD)   | 15,266  | 14.9  |
|                     | 5th and 6th deciles (3,963–4,620 USD)   | 18,532  | 18.1  |
|                     | 7th and 8th deciles (5,357–6,323 USD)   | 22,056  | 21.5  |
|                     | 9th and 10th deciles (7,925–11,288 USD) | 27,638  | 27.0  |
| Number of visits    | 4–6                                     | 16,175  | 15.8  |
|                     | 7–9                                     | 30,475  | 29.7  |
|                     | 10–12                                   | 30,236  | 29.5  |
|                     | ≥13                                     | 25,633  | 25.0  |
| Number of providers | 1                                       | 52,197  | 50.9  |
|                     | 2                                       | 31,825  | 31.0  |
|                     | 3                                       | 12,462  | 12.2  |
|                     | ≥4                                      | 6,053   | 5.9   |

| Variable                   |                           | N      | %    |
|----------------------------|---------------------------|--------|------|
| Level of hospital          | Tertiary general hospital | 4,857  | 4.7  |
|                            | General hospital          | 9,292  | 9.1  |
|                            | Hospital                  | 6,270  | 6.1  |
|                            | Clinic                    | 72,612 | 70.8 |
|                            | Others                    | 9,488  | 9.3  |
| Comorbidity: Diabetes      | Yes                       | 29,391 | 28.7 |
|                            | No                        | 73,128 | 71.3 |
| Comorbidity: Dyslipidaemia | Yes                       | 51,048 | 49.8 |
|                            | No                        | 51,471 | 50.2 |
| COC                        | High (COC index=1)        | 52,179 | 50.9 |
|                            | Low (COC index <1)        | 50,340 | 49.1 |
| MPR                        | Excellent (80–100%)       | 56,939 | 55.5 |
|                            | Good (60–79%)             | 16,012 | 15.6 |
|                            | Normal (40–59%)           | 11,808 | 11.5 |
|                            | Bad (20–39%)              | 9,996  | 9.8  |
|                            | Very bad (0–19%)          | 7,764  | 7.6  |
| Year of diagnosis          | 2004                      | 10,357 | 10.1 |
|                            | 2005                      | 12,362 | 12.1 |
|                            | 2006                      | 10,321 | 10.1 |
|                            | 2007                      | 9,017  | 8.8  |
|                            | 2008                      | 9,101  | 8.9  |
|                            | 2009                      | 8,906  | 8.7  |
|                            | 2010                      | 8,082  | 7.9  |
|                            | 2011                      | 7,807  | 7.6  |
|                            | 2012                      | 7,623  | 7.4  |
|                            | 2013                      | 6,699  | 6.5  |
|                            | 2014                      | 5,772  | 5.6  |
|                            | 2015                      | 6,472  | 6.3  |

1  
2  
3  
4  
5  
6  
7  
8  
9  
10  
11  
12  
13  
14  
15  
16  
17  
18  
19  
20  
21  
22  
23  
24  
25  
26  
27  
28  
29  
30  
31  
32  
33  
34  
35  
36  
37  
38  
39  
40  
41  
42  
43  
44  
45  
46  
47  
48  
49  
50  
51  
52  
53  
54  
55  
56  
57  
58  
59  
60

COC, continuity of care; N, number; MPR, medication possession ratio

For peer review only

**Supplementary Table 3. Subgroup analysis of the hazard ratio of medical complications according to the COC and MPR levels in clinics (primary care)**

|                  | Hazard Ratio |            |                |                            |                  |
|------------------|--------------|------------|----------------|----------------------------|------------------|
|                  | Patients     | Events (N) | IR per 1000PYR | HR (95% CI)                | <i>p</i> -value  |
| COC level        |              |            |                |                            |                  |
| High             | 36,273       | 4,437      | 13.8           | Ref                        |                  |
| Low              | 36,339       | 5,405      | 16.2           | <b>1.16 (1.12–1.21)***</b> | <b>&lt;0.001</b> |
| MPR Level        |              |            |                |                            |                  |
| Excellent        | 41,414       | 4,674      | 12.8           | Ref                        |                  |
| Good             | 11,326       | 1,738      | 16.1           | <b>1.21 (1.15–1.28)***</b> | <b>&lt;0.001</b> |
| Normal           | 7,953        | 1,362      | 18.1           | <b>1.37 (1.29–1.45)***</b> | <b>&lt;0.001</b> |
| Bad              | 6,518        | 1,118      | 18.7           | <b>1.43 (1.34–1.52)***</b> | <b>&lt;0.001</b> |
| Very bad         | 5,401        | 950        | 19.6           | <b>1.51 (1.40–1.61)***</b> | <b>&lt;0.001</b> |
| Number of visits |              |            |                |                            |                  |
| 4–6 times        | 8,770        | 1,388      | 17.8           | Ref                        |                  |
| 7–9 times        | 18,484       | 2,490      | 15.1           | <b>0.86 (0.80–0.91)***</b> | <b>&lt;0.001</b> |
| 10–12 times      | 23,493       | 3,112      | 14.1           | <b>0.78 (0.73–0.83)***</b> | <b>&lt;0.001</b> |
| Over 13 times    | 21,865       | 2,852      | 14.9           | <b>0.85 (0.80–0.91)***</b> | <b>&lt;0.001</b> |

CI, confidence interval; COC, continuity of care; ; HR, hazards ratio; IR, Incidence rate; MPR, medication possession

ratio; N, number; PYR, person years at risk

\*\*\*Significance at  $p < 0.001$ .

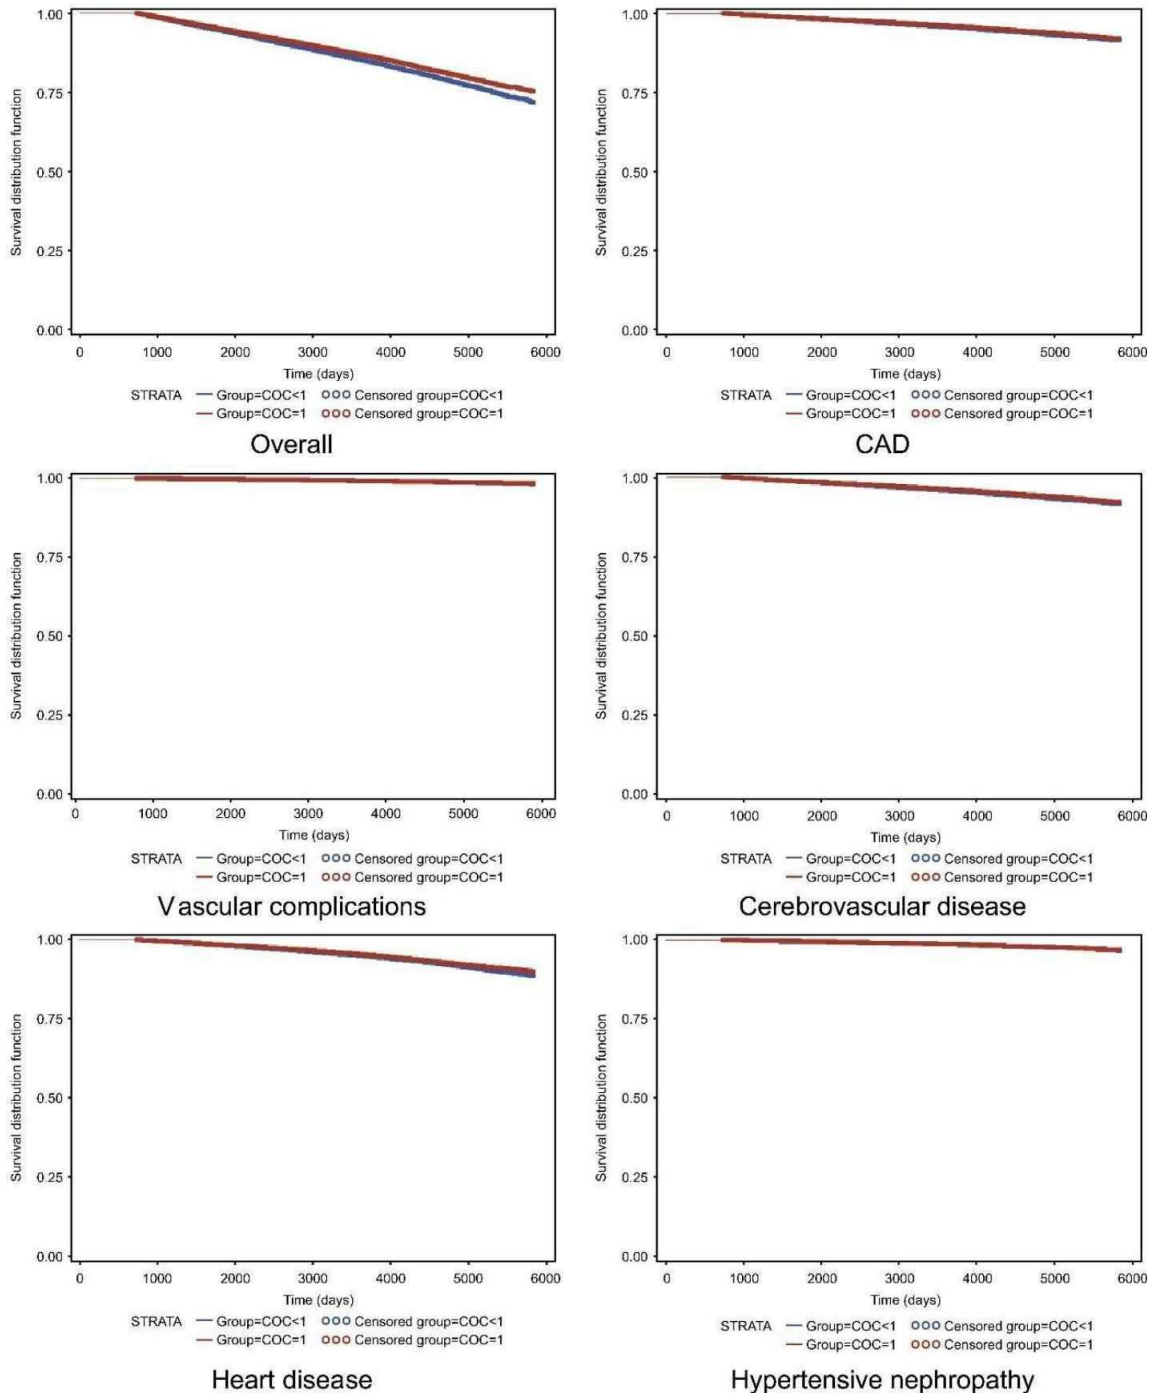

Supplementary Figure 1. Kaplan–Meier Curve of medical complications according to the Continuity of Care (COC) level

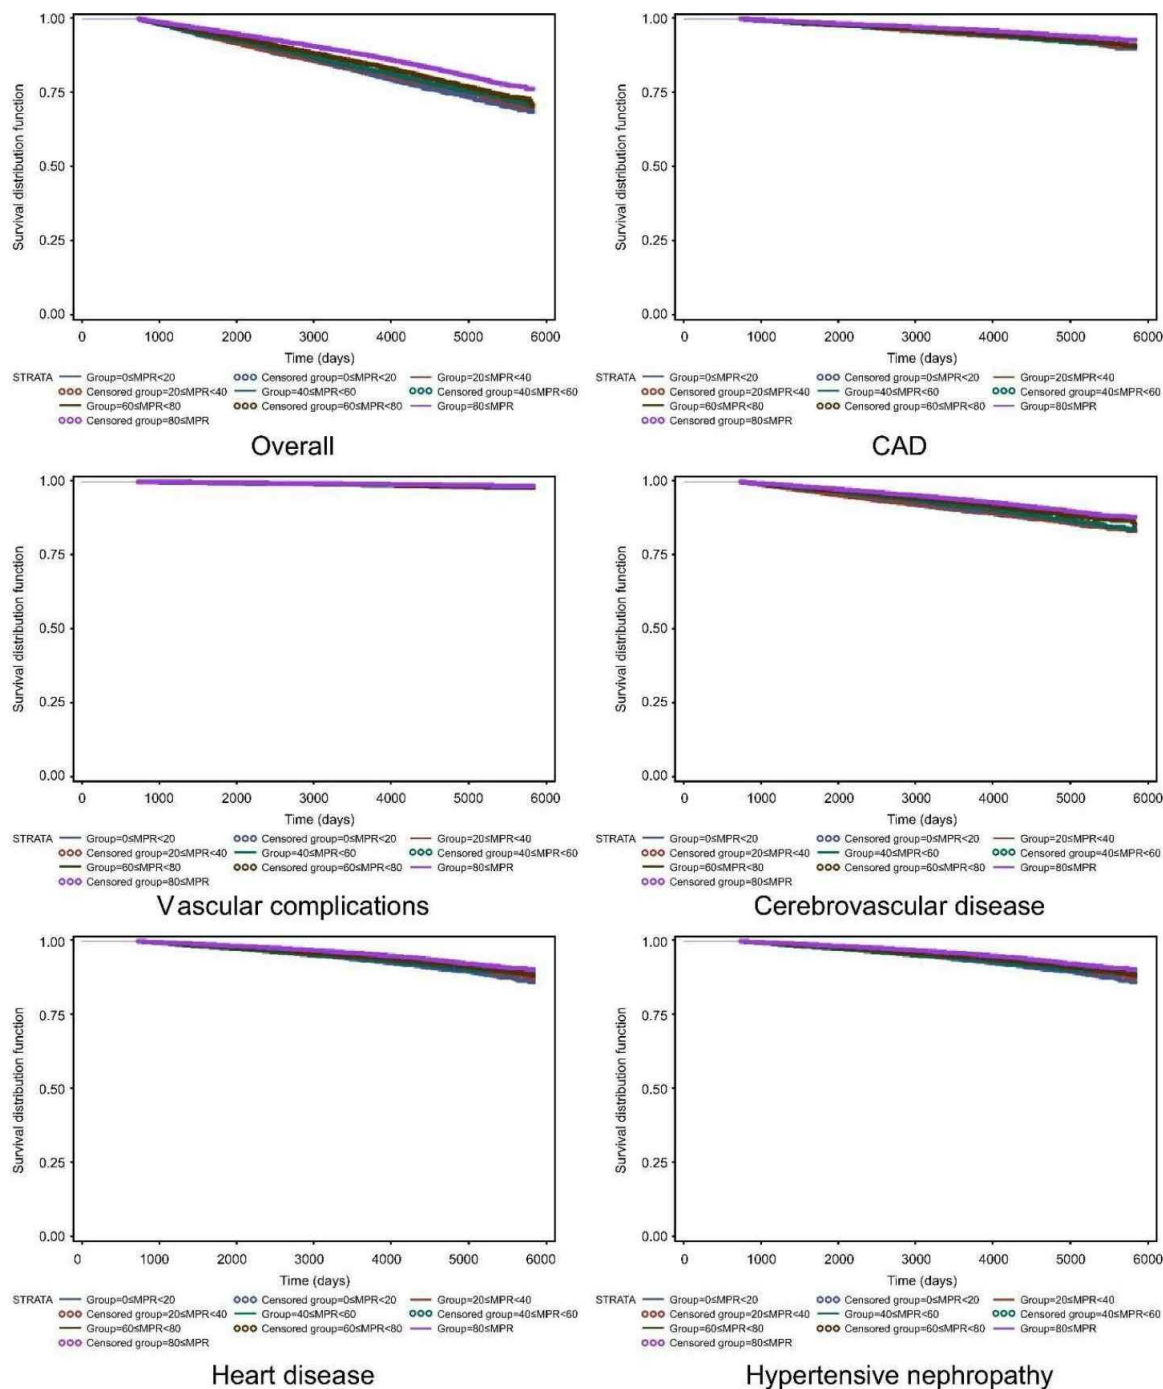

**Supplementary Figure 2.** Kaplan–Meier Curve of medical complications according to the medicine possession ratio (MPR) level



## STROBE Statement—checklist of items that should be included in reports of observational studies

|                           | Item No | Recommendation                                                                                                                                                                                                                                                                                                                                                                                                                                                         | Page No |
|---------------------------|---------|------------------------------------------------------------------------------------------------------------------------------------------------------------------------------------------------------------------------------------------------------------------------------------------------------------------------------------------------------------------------------------------------------------------------------------------------------------------------|---------|
| <b>Title and abstract</b> | 1       | (a) Indicate the study's design with a commonly used term in the title or the abstract                                                                                                                                                                                                                                                                                                                                                                                 | 1       |
|                           |         | (b) Provide in the abstract an informative and balanced summary of what was done and what was found                                                                                                                                                                                                                                                                                                                                                                    | 2       |
| <b>Introduction</b>       |         |                                                                                                                                                                                                                                                                                                                                                                                                                                                                        |         |
| Background/rationale      | 2       | Explain the scientific background and rationale for the investigation being reported                                                                                                                                                                                                                                                                                                                                                                                   | 4–5     |
| Objectives                | 3       | State specific objectives, including any prespecified hypotheses                                                                                                                                                                                                                                                                                                                                                                                                       | 5       |
| <b>Methods</b>            |         |                                                                                                                                                                                                                                                                                                                                                                                                                                                                        |         |
| Study design              | 4       | Present key elements of study design early in the paper                                                                                                                                                                                                                                                                                                                                                                                                                | 5       |
| Setting                   | 5       | Describe the setting, locations, and relevant dates, including periods of recruitment, exposure, follow-up, and data collection                                                                                                                                                                                                                                                                                                                                        | 6–10    |
| Participants              | 6       | (a) <i>Cohort study</i> —Give the eligibility criteria, and the sources and methods of selection of participants. Describe methods of follow-up<br><i>Case-control study</i> —Give the eligibility criteria, and the sources and methods of case ascertainment and control selection. Give the rationale for the choice of cases and controls<br><i>Cross-sectional study</i> —Give the eligibility criteria, and the sources and methods of selection of participants | 6       |
|                           |         | (b) <i>Cohort study</i> —For matched studies, give matching criteria and number of exposed and unexposed<br><i>Case-control study</i> —For matched studies, give matching criteria and the number of controls per case                                                                                                                                                                                                                                                 | N/A     |
| Variables                 | 7       | Clearly define all outcomes, exposures, predictors, potential confounders, and effect modifiers. Give diagnostic criteria, if applicable                                                                                                                                                                                                                                                                                                                               | 7–10    |
| Data sources/measurement  | 8*      | For each variable of interest, give sources of data and details of methods of assessment (measurement). Describe comparability of assessment methods if there is more than one group                                                                                                                                                                                                                                                                                   | 5–9     |
| Bias                      | 9       | Describe any efforts to address potential sources of bias                                                                                                                                                                                                                                                                                                                                                                                                              | 6       |
| Study size                | 10      | Explain how the study size was arrived at                                                                                                                                                                                                                                                                                                                                                                                                                              | 7       |
| Quantitative variables    | 11      | Explain how quantitative variables were handled in the analyses. If applicable, describe which groupings were chosen and why                                                                                                                                                                                                                                                                                                                                           | 6–9     |
| Statistical methods       | 12      | (a) Describe all statistical methods, including those used to control for confounding                                                                                                                                                                                                                                                                                                                                                                                  | 9–10    |
|                           |         | (b) Describe any methods used to examine subgroups and interactions                                                                                                                                                                                                                                                                                                                                                                                                    | 9–10    |
|                           |         | (c) Explain how missing data were addressed                                                                                                                                                                                                                                                                                                                                                                                                                            | 6       |
|                           |         | (d) <i>Cohort study</i> —If applicable, explain how loss to follow-up was addressed<br><i>Case-control study</i> —If applicable, explain how matching of cases and controls was addressed<br><i>Cross-sectional study</i> —If applicable, describe analytical methods taking account of sampling strategy                                                                                                                                                              | 7       |
|                           |         | (e) Describe any sensitivity analyses                                                                                                                                                                                                                                                                                                                                                                                                                                  | N/A     |

Continued on next page

| <b>Results</b>           |     |                                                                                                                                                                                                              |          |
|--------------------------|-----|--------------------------------------------------------------------------------------------------------------------------------------------------------------------------------------------------------------|----------|
| Participants             | 13* | (a) Report numbers of individuals at each stage of study—eg numbers potentially eligible, examined for eligibility, confirmed eligible, included in the study, completing follow-up, and analysed            | 6–7      |
|                          |     | (b) Give reasons for non-participation at each stage                                                                                                                                                         | 6        |
|                          |     | (c) Consider use of a flow diagram                                                                                                                                                                           | Figure 1 |
| Descriptive data         | 14* | (a) Give characteristics of study participants (eg demographic, clinical, social) and information on exposures and potential confounders                                                                     | 11–13    |
|                          |     | (b) Indicate number of participants with missing data for each variable of interest                                                                                                                          | N/A      |
|                          |     | (c) <i>Cohort study</i> —Summarise follow-up time (eg, average and total amount)                                                                                                                             | 7        |
| Outcome data             | 15* | <i>Cohort study</i> —Report numbers of outcome events or summary measures over time                                                                                                                          | 11–18    |
|                          |     | <i>Case-control study</i> —Report numbers in each exposure category, or summary measures of exposure                                                                                                         |          |
|                          |     | <i>Cross-sectional study</i> —Report numbers of outcome events or summary measures                                                                                                                           |          |
| Main results             | 16  | (a) Give unadjusted estimates and, if applicable, confounder-adjusted estimates and their precision (eg, 95% confidence interval). Make clear which confounders were adjusted for and why they were included | 11–19    |
|                          |     | (b) Report category boundaries when continuous variables were categorized                                                                                                                                    | 11–19    |
|                          |     | (c) If relevant, consider translating estimates of relative risk into absolute risk for a meaningful time period                                                                                             | 11–19    |
| Other analyses           | 17  | Report other analyses done—eg analyses of subgroups and interactions, and sensitivity analyses                                                                                                               | 19–20    |
| <b>Discussion</b>        |     |                                                                                                                                                                                                              |          |
| Key results              | 18  | Summarise key results with reference to study objectives                                                                                                                                                     | 20–21    |
| Limitations              | 19  | Discuss limitations of the study, taking into account sources of potential bias or imprecision. Discuss both direction and magnitude of any potential bias                                                   | 21–22    |
| Interpretation           | 20  | Give a cautious overall interpretation of results considering objectives, limitations, multiplicity of analyses, results from similar studies, and other relevant evidence                                   | 20–22    |
| Generalisability         | 21  | Discuss the generalisability (external validity) of the study results                                                                                                                                        | 20–22    |
| <b>Other information</b> |     |                                                                                                                                                                                                              |          |
| Funding                  | 22  | Give the source of funding and the role of the funders for the present study and, if applicable, for the original study on which the present article is based                                                | 23       |

\*Give information separately for cases and controls in case-control studies and, if applicable, for exposed and unexposed groups in cohort and cross-sectional studies.

**Note:** An Explanation and Elaboration article discusses each checklist item and gives methodological background and published examples of transparent reporting. The STROBE checklist is best used in conjunction with this article (freely available on the Web sites of PLoS Medicine at <http://www.plosmedicine.org/>, Annals of Internal Medicine at <http://www.annals.org/>, and Epidemiology at <http://www.epidem.com/>). Information on the STROBE Initiative is available at [www.strobe-statement.org](http://www.strobe-statement.org).
