# Supplementary material for: Association between medical complications according to continuity of care and medication adherence in patients with hypertension in Korea: a national population-based cohort study
Source: PubMed Central journal article supplement — BMJ Open. 2023 Jun 29;13(6):e073404. doi: 10.1136/bmjopen-2023-073404 (PMC10314624; doi:10.1136/bmjopen-2023-073404), 2023-06-29
Supplement: bmjopen-2023-073404supp001.pdf [file bmjopen-2023-073404supp001.pdf]

**Supplementary Materials****Supplementary Table 1. Antihypertensive drugs included**

| Drugs included                                                                                                                                                                                                                                                                                                                                                                                                                                              |
|-------------------------------------------------------------------------------------------------------------------------------------------------------------------------------------------------------------------------------------------------------------------------------------------------------------------------------------------------------------------------------------------------------------------------------------------------------------|
| Captopril, enalapril, ramipril, candesartan, fimasartan, losartan, olmesartan, telmisartan, valsartan, carteolol, nadolol, propranolol, nifedipine, felodipine, amlodipine, lercanidipine, CCB, diltiazem, verapamil, atenolol, bisoprolol, celiprolol, metoprolol, amosulalol, carvedilol, bevantolol, doxazosin, terazosin, hydrochlorothiazide, indapamide, furosemide, torsemide, spironolactone, amiloride, hydralazine, minoxidil, and nitroprusside. |

**Supplementary Table 2. General characteristics of the study population**

| Variable            |                                         | N       | %     |
|---------------------|-----------------------------------------|---------|-------|
| Total               |                                         | 102,519 | 100.0 |
| Sex                 | Male                                    | 51,522  | 50.3  |
|                     | Female                                  | 50,997  | 49.7  |
| Age                 | 30–39                                   | 2,084   | 2.0   |
|                     | 40–49                                   | 16,943  | 16.5  |
|                     | 50–59                                   | 15,266  | 14.9  |
|                     | 60–69                                   | 18,532  | 18.1  |
|                     | 70–79                                   | 22,056  | 21.5  |
|                     | >80                                     | 27,638  | 27.0  |
| Insurance type      | National Health Insurance               | 96,325  | 94.0  |
|                     | Others                                  | 6,194   | 6.0   |
| Income              | 0 decile (0 USD)                        | 284     | 2.0   |
|                     | 1st and 2nd deciles (857–1,781 USD)     | 16,943  | 16.5  |
|                     | 3rd and 4th deciles (2,609–3,273 USD)   | 15,266  | 14.9  |
|                     | 5th and 6th deciles (3,963–4,620 USD)   | 18,532  | 18.1  |
|                     | 7th and 8th deciles (5,357–6,323 USD)   | 22,056  | 21.5  |
|                     | 9th and 10th deciles (7,925–11,288 USD) | 27,638  | 27.0  |
| Number of visits    | 4–6                                     | 16,175  | 15.8  |
|                     | 7–9                                     | 30,475  | 29.7  |
|                     | 10–12                                   | 30,236  | 29.5  |
|                     | ≥13                                     | 25,633  | 25.0  |
| Number of providers | 1                                       | 52,197  | 50.9  |
|                     | 2                                       | 31,825  | 31.0  |
|                     | 3                                       | 12,462  | 12.2  |
|                     | ≥4                                      | 6,053   | 5.9   |

| Variable                   |                           | N      | %    |
|----------------------------|---------------------------|--------|------|
| Level of hospital          | Tertiary general hospital | 4,857  | 4.7  |
|                            | General hospital          | 9,292  | 9.1  |
|                            | Hospital                  | 6,270  | 6.1  |
|                            | Clinic                    | 72,612 | 70.8 |
|                            | Others                    | 9,488  | 9.3  |
| Comorbidity: Diabetes      | Yes                       | 29,391 | 28.7 |
|                            | No                        | 73,128 | 71.3 |
| Comorbidity: Dyslipidaemia | Yes                       | 51,048 | 49.8 |
|                            | No                        | 51,471 | 50.2 |
| COC                        | High (COC index=1)        | 52,179 | 50.9 |
|                            | Low (COC index <1)        | 50,340 | 49.1 |
| MPR                        | Excellent (80–100%)       | 56,939 | 55.5 |
|                            | Good (60–79%)             | 16,012 | 15.6 |
|                            | Normal (40–59%)           | 11,808 | 11.5 |
|                            | Bad (20–39%)              | 9,996  | 9.8  |
|                            | Very bad (0–19%)          | 7,764  | 7.6  |
| Year of diagnosis          | 2004                      | 10,357 | 10.1 |
|                            | 2005                      | 12,362 | 12.1 |
|                            | 2006                      | 10,321 | 10.1 |
|                            | 2007                      | 9,017  | 8.8  |
|                            | 2008                      | 9,101  | 8.9  |
|                            | 2009                      | 8,906  | 8.7  |
|                            | 2010                      | 8,082  | 7.9  |
|                            | 2011                      | 7,807  | 7.6  |
|                            | 2012                      | 7,623  | 7.4  |
|                            | 2013                      | 6,699  | 6.5  |
|                            | 2014                      | 5,772  | 5.6  |
|                            | 2015                      | 6,472  | 6.3  |

COC, continuity of care; N, number; MPR, medication possession ratio

**Supplementary Table 3. Subgroup analysis of the hazard ratio of medical complications according to the COC and MPR levels in clinics (primary care)**

|                  | Hazard Ratio |            |                |                            |                  |
|------------------|--------------|------------|----------------|----------------------------|------------------|
|                  | Patients     | Events (N) | IR per 1000PYR | HR (95% CI)                | <i>p</i> -value  |
| COC level        |              |            |                |                            |                  |
| High             | 36,273       | 4,437      | 13.8           | Ref                        |                  |
| Low              | 36,339       | 5,405      | 16.2           | <b>1.16 (1.12–1.21)***</b> | <b>&lt;0.001</b> |
| MPR Level        |              |            |                |                            |                  |
| Excellent        | 41,414       | 4,674      | 12.8           | Ref                        |                  |
| Good             | 11,326       | 1,738      | 16.1           | <b>1.21 (1.15–1.28)***</b> | <b>&lt;0.001</b> |
| Normal           | 7,953        | 1,362      | 18.1           | <b>1.37 (1.29–1.45)***</b> | <b>&lt;0.001</b> |
| Bad              | 6,518        | 1,118      | 18.7           | <b>1.43 (1.34–1.52)***</b> | <b>&lt;0.001</b> |
| Very bad         | 5,401        | 950        | 19.6           | <b>1.51 (1.40–1.61)***</b> | <b>&lt;0.001</b> |
| Number of visits |              |            |                |                            |                  |
| 4–6 times        | 8,770        | 1,388      | 17.8           | Ref                        |                  |
| 7–9 times        | 18,484       | 2,490      | 15.1           | <b>0.86 (0.80–0.91)***</b> | <b>&lt;0.001</b> |
| 10–12 times      | 23,493       | 3,112      | 14.1           | <b>0.78 (0.73–0.83)***</b> | <b>&lt;0.001</b> |
| Over 13 times    | 21,865       | 2,852      | 14.9           | <b>0.85 (0.80–0.91)***</b> | <b>&lt;0.001</b> |

CI, confidence interval; COC, continuity of care; ; HR, hazards ratio; IR, Incidence rate; MPR, medication possession ratio; N, number; PYR, person years at risk

\*\*\*Significance at  $p < 0.001$ .

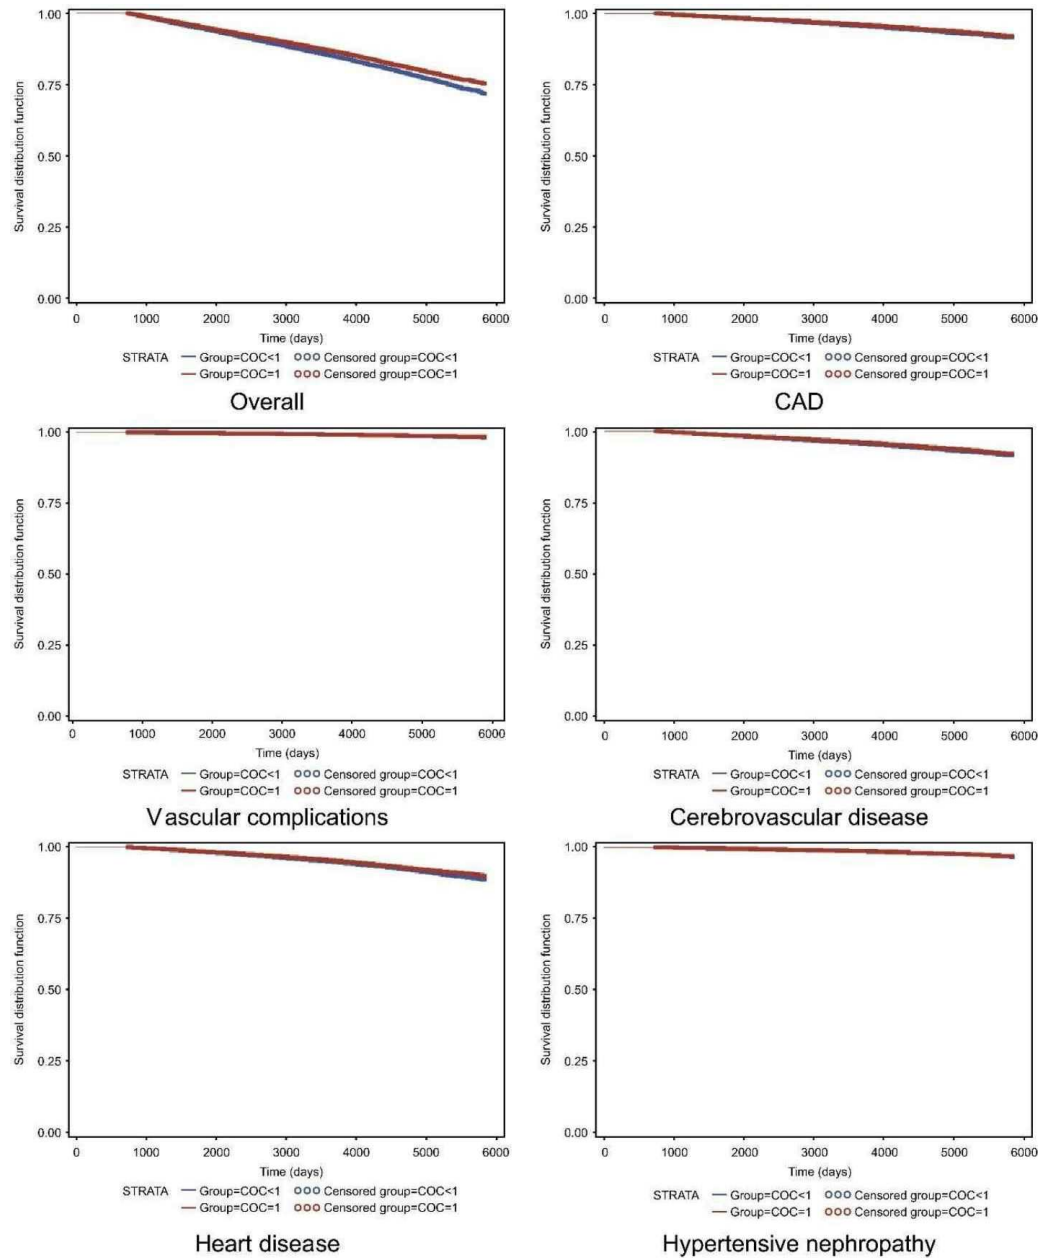

**Supplementary Figure 1.** Kaplan–Meier Curve of medical complications according to the Continuity of Care (COC) level

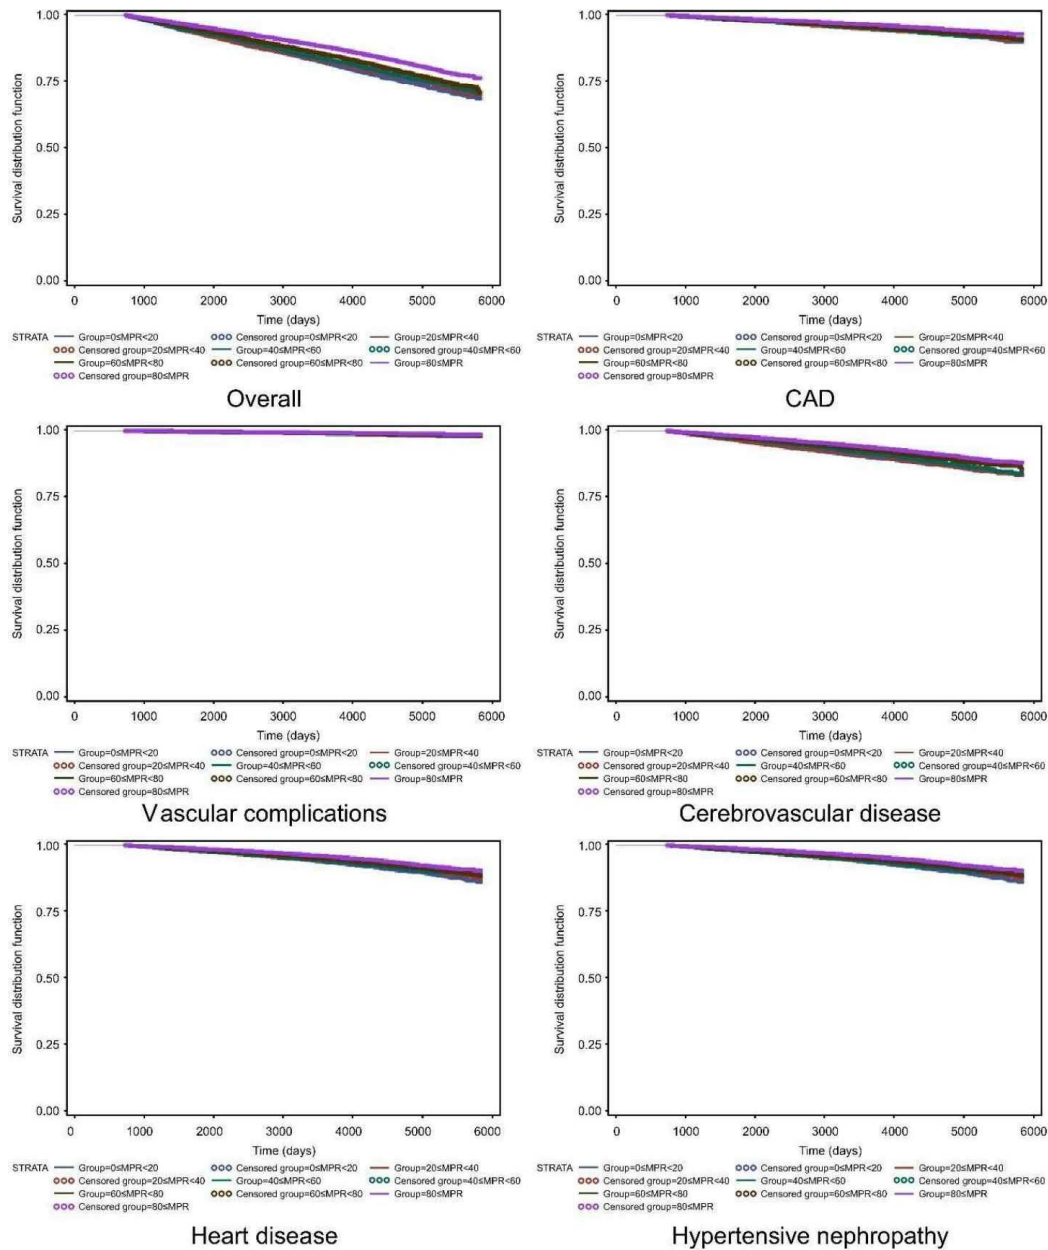

**Supplementary Figure 2.** Kaplan–Meier Curve of medical complications according to the medicine possession ratio (MPR) level
