# Supplementary figures and images for: Association between medical complications according to continuity of care and medication adherence in patients with hypertension in Korea: a national population-based cohort study
Source: PubMed Central journal article supplement — BMJ Open. 2023 Jun 29;13(6):e073404. doi: 10.1136/bmjopen-2023-073404 (PMC10314624; doi:10.1136/bmjopen-2023-073404), 2023-06-29

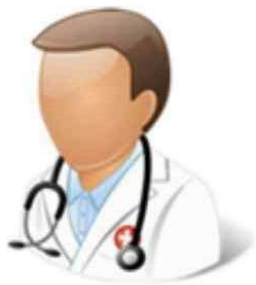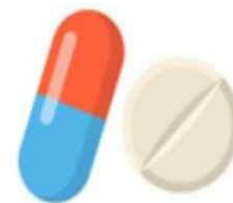

### Continuity of Care

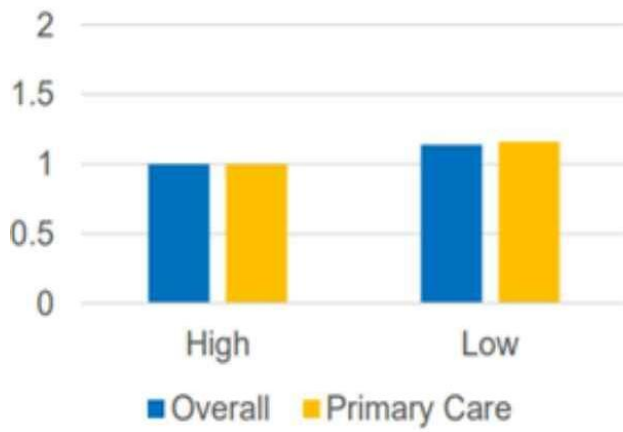

\* High: COC=1  
Low: COC<1

### Medication Adherence

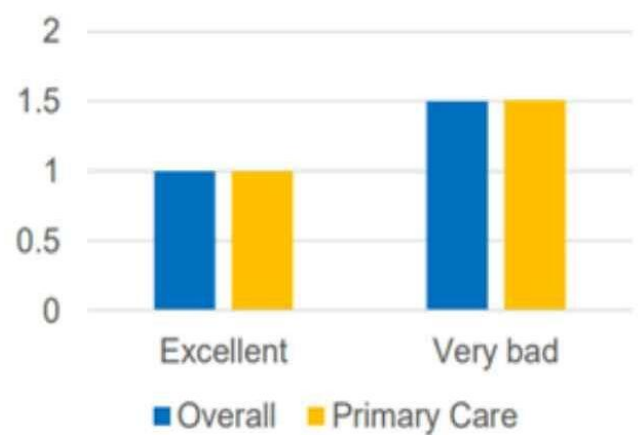

\* Excellent: MPR 80-100%  
Very bad: MPR 0-19%

Supplement: bmjopen-2023-073404supp002.pdf [file bmjopen-2023-073404supp002.pdf]
